# Supplementary material for: Metabolomic biomarkers in autism: identification of complex dysregulations of cellular bioenergetics
Source: Front Psychiatry. 2023 Oct 2;14:1249578. doi: 10.3389/fpsyt.2023.1249578 (PMC10622772; doi:10.3389/fpsyt.2023.1249578)
Supplement: Supplementary file 1 [file Table_1.xlsx]

## Sheet: S.Table1
Supplementary Table 1. Metabolites, Chemical Reference Compounds, and Ions Measured by Mass Spectrometry Methods.
