# Supplementary material for: Metabolomic biomarkers in autism: identification of complex dysregulations of cellular bioenergetics
Source: Front Psychiatry. 2023 Oct 2;14:1249578. doi: 10.3389/fpsyt.2023.1249578 (PMC10622772; doi:10.3389/fpsyt.2023.1249578)
Supplement: Supplementary file 11 [file Table_11.xlsx]

## Sheet: S.Table11
Supplementary Table 11. Welch T-Tests Between Numerical CAMP Behavioral and Phenotypic Data and Biomarker Positive and Negative Populations
Biomarker	Variable	Description	Pos.mean	Neg.mean	Fold	effsize	p	p.adj
Methionine/Carnitine	MSEL RL	MSEL Receptive Language T-score	21.68	27.2542	0.795473	-0.645505	3.57553e-07	0.000654323
Taurine/Malate	BMI	Participants body mass index	15.7693	16.7551	0.941167	-0.612998	7.93565e-07	0.000726112
Alanine/Tyrosine	MSEL DQ	MSEL Developmental Quotient (DQ)	54.8	63.1329	0.86801	-0.631241	1.43825e-06	0.000877333
Ornithine/Carnitine	MSEL FM	MSEL Fine Motor T-score	23.1212	28.7457	0.804337	-0.642835	1.16853e-05	0.00534603
Ornithine/Carnitine	MSEL DQ	MSEL Developmental Quotient (DQ)	54.3636	63.2629	0.859328	-0.630425	1.50941e-05	0.00552445
Methionine/Carnitine	MSEL DQ	MSEL Developmental Quotient (DQ)	54.88	63.0847	0.869941	-0.603283	4.59738e-05	0.014022
Alanine/Phenylalanine	MSEL RL	MSEL Receptive Language T-score	22.6071	27.2739	0.828893	-0.520239	0.000118363	0.0270756
Ornithine/Carnitine	MSEL RL	MSEL Receptive Language T-score	21.9394	27.3319	0.802703	-0.572713	0.000104772	0.0270756
Methionine/Carnitine	MSEL EL	MSEL Expressive Language T-score	22.88	28.3305	0.80761	-0.637481	0.000151542	0.0308136
Alanine/Phenylalanine	MSEL DQ	MSEL Developmental Quotient (DQ)	56.6786	63.0743	0.8986	-0.473805	0.00024369	0.041929
Ethanolamine/4-hydroxyproline	MSEL VR	MSEL Visual Reception T-score	24.1923	31.8432	0.759732	-0.660285	0.000252032	0.041929
↑Malate	MSEL RL	MSEL Receptive Language T-score	22.9	27.4295	0.834867	-0.459988	0.000373407	0.0569446
Alanine/Tyrosine	MSEL FM	MSEL Fine Motor T-score	23.44	28.673	0.817494	-0.592788	0.000479803	0.0627171
Ornithine/Carnitine	MSEL EL	MSEL Expressive Language T-score	23.3636	28.3901	0.822951	-0.55902	0.000460279	0.0627171
Alanine/Kynurenine	MSEL FM	MSEL Fine Motor T-score	23.7143	28.69	0.826569	-0.558052	0.000587172	0.0632074
Alanine/Tyrosine	MSEL RL	MSEL Receptive Language T-score	22.8	27.2342	0.837183	-0.493527	0.000548758	0.0632074
Alanine/Tyrosine	MSEL VR	MSEL Visual Reception T-score	25.64	31.7468	0.80764	-0.551318	0.000574557	0.0632074
↑LacPyr	MSEL RL	MSEL Receptive Language T-score	24.3723	27.9639	0.871562	-0.332248	0.000622108	0.0632477
Leucine	MSEL RL	MSEL Receptive Language T-score	23.0323	27.2756	0.844426	-0.4589	0.000999034	0.0962227
Ethanolamine/4-hydroxyproline	MSEL DQ	MSEL Developmental Quotient (DQ)	54.7308	63.1695	0.866411	-0.574981	0.00107879	0.0987092
Arginine/Carnitine	MSEL RL	MSEL Receptive Language T-score	23.1071	27.2115	0.849167	-0.448595	0.00157966	0.137656
Ethanolamine/4-hydroxyproline	MSEL RL	MSEL Receptive Language T-score	22.4231	27.2712	0.822226	-0.511583	0.00188376	0.146208
Lactate/Hexanoylcarnitine	ADOS-2 Comparison Score	ADOS-2 Module-1 or Module-2 Comparison Severity Score	8.31579	7.04321	1.18068	0.759222	0.00219344	0.146208
Leucine/Glutarylcarnitine	MSEL EL	MSEL Expressive Language T-score	23.7778	28.306	0.840025	-0.515741	0.00178252	0.146208
Leucine/Glutarylcarnitine	MSEL FM	MSEL Fine Motor T-score	23.8519	28.5431	0.835643	-0.522393	0.00201935	0.146208
Malate/Carnitine	MSEL RL	MSEL Receptive Language T-score	23.32	27.3826	0.851637	-0.405473	0.00210633	0.146208
Ornithine/Carnitine	MSEL VR	MSEL Visual Reception T-score	26.3636	31.7974	0.829113	-0.466965	0.00221932	0.146208
Taurine/4-hydroxyproline	BMI	Participants body mass index	16.0649	16.7598	0.95854	-0.40035	0.00223706	0.146208
Ethanolamine/4-hydroxyproline	MSEL FM	MSEL Fine Motor T-score	23.3077	28.7097	0.811839	-0.570514	0.00256459	0.15653
Leucine/Glutarylcarnitine	MSEL DQ	MSEL Developmental Quotient (DQ)	55.6667	63.0172	0.883356	-0.505737	0.0026166	0.15653
Xanthine/Carnitine	ADOS-2 RRB CSS	ADOS-2 Module-1 or Module-2 Restrictive Repetitive Calibrated Severity Score	8.65	7.7767	1.1123	0.609858	0.00265161	0.15653
Leucine	MSEL DQ	MSEL Developmental Quotient (DQ)	56.4516	63.1303	0.894207	-0.459133	0.00275371	0.157478
↑LacPyr	MSEL DQ	MSEL Developmental Quotient (DQ)	59.1971	63.9944	0.925035	-0.289521	0.00304483	0.16885
Lactate/Ornithine	AgeMonths	Participants age in months	30.4375	35.3849	0.860182	-0.608015	0.00319495	0.171963
Lactate/Alanine	AgeMonths	Participants age in months	30.5455	35.3879	0.86316	-0.590591	0.00372504	0.191956
Lactate/Hexanoylcarnitine	MSEL FM	MSEL Fine Motor T-score	24.4848	28.559	0.857344	-0.447547	0.00377618	0.191956
Arginine/Carnitine	MSEL DQ	MSEL Developmental Quotient (DQ)	56.4643	63.0577	0.895439	-0.455967	0.00406627	0.195823
Leucine	MSEL FM	MSEL Fine Motor T-score	24.6129	28.6624	0.858718	-0.446809	0.00396677	0.195823
↑LacPyr	MSEL EL	MSEL Expressive Language T-score	26.0365	28.825	0.903261	-0.278176	0.00432574	0.197903
↓Glutamine	ADOS-2 Comparison Score	ADOS-2 Module-1 or Module-2 Comparison Severity Score	8	7.02524	1.13875	0.558139	0.00430758	0.197903
Alanine/Kynurenine	MSEL DQ	MSEL Developmental Quotient (DQ)	56.6786	63.0743	0.8986	-0.442451	0.00517111	0.200594
Lactate/Alanine	MSEL RL	MSEL Receptive Language T-score	23.1818	27.2435	0.850911	-0.421737	0.00467984	0.200594
Lactate/Hexanoylcarnitine	MSEL VR	MSEL Visual Reception T-score	26.697	31.7293	0.841399	-0.431638	0.00469442	0.200594
Lactate/Leucine	AgeMonths	Participants age in months	30.4	35.3662	0.859579	-0.602443	0.00497497	0.200594
Taurine/Ethanolamine	BMI	Participants body mass index	15.9212	16.7439	0.950863	-0.470875	0.00511867	0.200594
Xanthine/Histidine	ADOS-2 Comparison Score	ADOS-2 Module-1 or Module-2 Comparison Severity Score	8.1875	7.07372	1.15745	0.70568	0.00488404	0.200594
↑Malate	MSEL DQ	MSEL Developmental Quotient (DQ)	57.68	63.2304	0.912219	-0.364963	0.00526149	0.200594
↑Malate	MSEL EL	MSEL Expressive Language T-score	24.7	28.4318	0.868747	-0.391594	0.00480296	0.200594
Arginine/Carnitine	MSEL EL	MSEL Expressive Language T-score	24.2857	28.2842	0.858632	-0.449287	0.00620813	0.206562
Citrulline/Carnitine	MSEL DQ	MSEL Developmental Quotient (DQ)	56.44	63.0021	0.895843	-0.456013	0.00611185	0.206562
Ethanolamine/4-hydroxyproline	AgeMonths	Participants age in months	38.5769	34.8496	1.10696	0.529812	0.00595457	0.206562
Lactate/Homocitrulline	AgeMonths	Participants age in months	32.04	35.4049	0.904959	-0.431273	0.00566807	0.206562
Lactate/Valine	AgeMonths	Participants age in months	30.4667	35.3541	0.861758	-0.591163	0.00580951	0.206562
Malate/Carnitine	MSEL EL	MSEL Expressive Language T-score	24.62	28.4407	0.86566	-0.392696	0.00600664	0.206562
↓C5DC	MSEL FM	MSEL Fine Motor T-score	25.4286	28.7056	0.88584	-0.341007	0.00565098	0.206562
Homoserine/Carnitine	MSEL FM	MSEL Fine Motor T-score	24.6	28.6146	0.859702	-0.437119	0.00677407	0.221367
Glycine/Carnitine	MSEL DQ	MSEL Developmental Quotient (DQ)	57.9074	63.2528	0.915491	-0.346647	0.00715031	0.221781
Hypoxanthine/4-hydroxyproline	MSEL RL	MSEL Receptive Language T-score	22.8929	27.1913	0.841917	-0.443108	0.00704989	0.221781
Xanthine/Histidine	ADOS-2 SA CSS	ADOS-2 Module-1 or Module-2 Social Affect Calibrated Severity Score	7.75	6.84615	1.13202	0.612933	0.00691553	0.221781
Lactate/Arginine	MSEL RL	MSEL Receptive Language T-score	23.4634	27.2967	0.85957	-0.383562	0.0073494	0.224157
Lactate/Arginine	AgeMonths	Participants age in months	31.6585	35.3538	0.895476	-0.466266	0.00751034	0.22531
↑Gly↓BCAA	MSEL RL	MSEL Receptive Language T-score	24.4321	27.512	0.888054	-0.295327	0.00805772	0.231891
↑LacPyr	ADOS-2 Comparison Score	ADOS-2 Module-1 or Module-2 Comparison Severity Score	7.57647	6.96552	1.08771	0.338128	0.00798481	0.231891
↑Malate	AgeMonths	Participants age in months	32.22	35.3848	0.910561	-0.408376	0.00810984	0.231891
Glycine/Carnitine	MSEL FM	MSEL Fine Motor T-score	25.4259	28.7314	0.884953	-0.34372	0.00833247	0.234591
Alanine/Kynurenine	MSEL RL	MSEL Receptive Language T-score	23.25	27.2357	0.85366	-0.416351	0.00863608	0.239455
Lactate/Decanoylcarnitine	MSEL FM	MSEL Fine Motor T-score	24.7742	28.5217	0.868607	-0.412314	0.00882561	0.241058
Lactate/Phenylalanine	AgeMonths	Participants age in months	31.1515	35.3448	0.88136	-0.517187	0.00927226	0.249533
Pyruvate/Homocitrulline	AgeMonths	Participants age in months	31.7073	35.3684	0.896487	-0.455298	0.00975955	0.25884
Pyruvate/Palmitoylcarnitine	MSEL FM	MSEL Fine Motor T-score	24.5769	28.4925	0.862576	-0.435404	0.00991458	0.259196
↑LacPyr	ADOS-2 SA CSS	ADOS-2 Module-1 or Module-2 Social Affect Calibrated Severity Score	7.30588	6.7318	1.08528	0.329477	0.010064	0.259395
Alanine/Tyrosine	MSEL EL	MSEL Expressive Language T-score	24.84	28.2532	0.879194	-0.398196	0.0106725	0.268657
Lactate/Citrate	AgeMonths	Participants age in months	31.2903	35.3176	0.88597	-0.509187	0.0110079	0.268657
Ornithine/Phenylalanine	MSEL RL	MSEL Receptive Language T-score	23.0345	27.2574	0.845071	-0.425556	0.0113042	0.268657
↑Alanine	MSEL FM	MSEL Fine Motor T-score	25.6308	28.8272	0.889118	-0.320847	0.0108297	0.268657
↑Gly↓BCAA	MSEL DQ	MSEL Developmental Quotient (DQ)	58.8395	63.4665	0.927095	-0.288359	0.0112362	0.268657
↓Hydroxyproline	MSEL RL	MSEL Receptive Language T-score	24.1875	27.4276	0.881868	-0.311816	0.0111019	0.268657
Lactate/Hexanoylcarnitine	MSEL DQ	MSEL Developmental Quotient (DQ)	57.2121	63.0022	0.908097	-0.389794	0.0116966	0.274421
Ornithine/Phenylalanine	MSEL EL	MSEL Expressive Language T-score	24.2069	28.3213	0.854725	-0.439717	0.0123249	0.279217
Serine/Isoleucine	MSEL FM	MSEL Fine Motor T-score	23.8462	28.6617	0.831986	-0.489717	0.0123588	0.279217
↓Hydroxyproline	BMI	Participants body mass index	16.28	16.7667	0.970972	-0.272547	0.0121087	0.279217
Alanine/Lysine	MSEL VR	MSEL Visual Reception T-score	27.234	31.8537	0.854974	-0.364226	0.0125979	0.27936
↑Gly↓BCAA	MSEL VR	MSEL Visual Reception T-score	28.358	32.0383	0.88513	-0.28737	0.0126704	0.27936
Citrulline/Glutarylcarnitine	MSEL FM	MSEL Fine Motor T-score	25.3125	28.6072	0.884829	-0.344153	0.0129108	0.281271
Methionine/Carnitine	MSEL VR	MSEL Visual Reception T-score	26.6	31.6928	0.839307	-0.435057	0.0132168	0.284549
Alanine/Kynurenine	ADOS-2 SA CSS	ADOS-2 Module-1 or Module-2 Social Affect Calibrated Severity Score	7.7	6.81098	1.13053	0.559076	0.013388	0.284884
Lactate/Decanoylcarnitine	MSEL VR	MSEL Visual Reception T-score	27.2903	31.6674	0.86178	-0.377823	0.0137553	0.289335
Taurine/Malate	AgeMonths	Participants age in months	38.8929	34.838	1.11639	0.515124	0.0140326	0.290266
↑LacPyr	AgeMonths	Participants age in months	33.6131	35.6194	0.943674	-0.253338	0.0141168	0.290266
Lactate/Palmitoylcarnitine	AgeMonths	Participants age in months	32.3462	35.4465	0.912535	-0.384459	0.0144187	0.290719
Malate/Carnitine	MSEL DQ	MSEL Developmental Quotient (DQ)	57.78	63.2192	0.913962	-0.341862	0.0144565	0.290719
Alanine/Lysine	BMI	Participants body mass index	17.5675	16.6146	1.05735	0.42635	0.0154347	0.307016
↓Carnitine2	MSEL RL	MSEL Receptive Language T-score	24.6333	27.4914	0.896038	-0.266683	0.0161023	0.316853
↑LacPyr	MSEL VR	MSEL Visual Reception T-score	29.1679	32.3	0.90303	-0.236146	0.0164668	0.320577
Lactate/Hexanoylcarnitine	ADOS-2 SA CSS	ADOS-2 Module-1 or Module-2 Social Affect Calibrated Severity Score	7.73684	6.8179	1.13478	0.567079	0.0169041	0.325627
Glutamine	MSEL VR	MSEL Visual Reception T-score	27.0385	31.6829	0.853409	-0.399935	0.0175838	0.330308
Lactate/Octanoylcarnitine	MSEL FM	MSEL Fine Motor T-score	25.2121	28.5066	0.884433	-0.361436	0.0173528	0.330308
Lactate/Urate	AgeMonths	Participants age in months	31.5455	35.3168	0.893214	-0.466093	0.0176886	0.330308
Leucine/Glutarylcarnitine	MSEL VR	MSEL Visual Reception T-score	26.963	31.6487	0.851945	-0.399641	0.0180121	0.332952
↓Glutamine	ADOS-2 SA CSS	ADOS-2 Module-1 or Module-2 Social Affect Calibrated Severity Score	7.54839	6.79495	1.11088	0.44972	0.0182305	0.333619
Glutamine	MSEL DQ	MSEL Developmental Quotient (DQ)	57.6923	62.9915	0.915874	-0.368848	0.0201555	0.341525
Glycine/Carnitine	MSEL RL	MSEL Receptive Language T-score	24.2407	27.307	0.887712	-0.300912	0.0192971	0.341525
Glycine/Lysine	ADOS-2 Comparison Score	ADOS-2 Module-1 or Module-2 Comparison Severity Score	8.05	7.04587	1.14251	0.569426	0.0199853	0.341525
Lactate/Glutamine	AgeMonths	Participants age in months	31.6471	35.3175	0.896073	-0.451885	0.0197311	0.341525
Lactate/Taurine	AgeMonths	Participants age in months	31.8462	35.3406	0.901121	-0.424735	0.0200875	0.341525
Leucine/Glutarylcarnitine	MSEL RL	MSEL Receptive Language T-score	23.3704	27.1789	0.859872	-0.391682	0.0200573	0.341525
Xanthine/Histidine	ADOS-2 RRB CSS	ADOS-2 Module-1 or Module-2 Restrictive Repetitive Calibrated Severity Score	8.625	7.78205	1.10832	0.564371	0.0196131	0.341525
↑Malate	MSEL VR	MSEL Visual Reception T-score	28.24	31.7942	0.888213	-0.297752	0.019425	0.341525
Malate/Homoserine	AgeMonths	Participants age in months	31.1852	35.2894	0.883699	-0.506459	0.0203441	0.341557
Lactate/Tyrosine	AgeMonths	Participants age in months	31.5882	35.3218	0.894298	-0.452603	0.0210704	0.350534
↓Hydroxyproline	MSEL DQ	MSEL Developmental Quotient (DQ)	58.7344	63.3011	0.927856	-0.286417	0.0214426	0.353514
gamma-Aminobutyric Acid/Hexanoylcarnitine	ADOS-2 SA CSS	ADOS-2 Module-1 or Module-2 Social Affect Calibrated Severity Score	7.90909	6.83434	1.15726	0.697985	0.0217314	0.355075
Alanine/Kynurenine	ADOS-2 Comparison Score	ADOS-2 Module-1 or Module-2 Comparison Severity Score	8	7.05793	1.13348	0.544066	0.022331	0.356985
Citrulline/Carnitine	MSEL FM	MSEL Fine Motor T-score	24.48	28.5784	0.856591	-0.429954	0.0222615	0.356985
Lactate/Glycine	AgeMonths	Participants age in months	31.3793	35.2949	0.889061	-0.480487	0.0226286	0.356985
Lactate/Serine	MSEL RL	MSEL Receptive Language T-score	23.3704	27.1809	0.85981	-0.387754	0.0225112	0.356985
↓Hydroxyproline	MSEL VR	MSEL Visual Reception T-score	28.1875	31.9195	0.88308	-0.290601	0.023023	0.360104
Homoserine/Carnitine	MSEL EL	MSEL Expressive Language T-score	24.5333	28.2827	0.867434	-0.39611	0.0235752	0.365615
Alanine/Carnitine	BMI	Participants body mass index	17.653	16.622	1.06202	0.451086	0.0242948	0.365765
Hypoxanthine/4-hydroxyproline	ADOS-2 Comparison Score	ADOS-2 Module-1 or Module-2 Comparison Severity Score	7.95	7.08442	1.12218	0.519572	0.0243843	0.365765
Lactate/Serine	AgeMonths	Participants age in months	31.3333	35.2809	0.888112	-0.489174	0.0240689	0.365765
Octanoylcarnitine/Citrate	MSEL EL	MSEL Expressive Language T-score	24.76	28.2339	0.87696	-0.388903	0.0238032	0.365765
Ethanolamine/Malate	ADOS-2 Comparison Score	ADOS-2 Module-1 or Module-2 Comparison Severity Score	8.04	7.04361	1.14146	0.519367	0.0257335	0.369797
Glycine/Carnitine	MSEL VR	MSEL Visual Reception T-score	28.0556	31.8488	0.8809	-0.300546	0.0255719	0.369797
Homoserine/Carnitine	AgeMonths	Participants age in months	38.0333	34.8758	1.09054	0.421422	0.026164	0.369797
Homoserine/Carnitine	MSEL DQ	MSEL Developmental Quotient (DQ)	57.1667	63.0257	0.907037	-0.379965	0.026054	0.369797
Homoserine/Citrate	AgeMonths	Participants age in months	38	34.8846	1.08931	0.422888	0.0252135	0.369797
Lactate/Homoserine	AgeMonths	Participants age in months	31.4286	35.2836	0.890742	-0.475183	0.0259573	0.369797
Xanthine/Carnitine	ADOS-2 Comparison Score	ADOS-2 Module-1 or Module-2 Comparison Severity Score	7.9	7.07767	1.11619	0.499474	0.0266718	0.369797
a-Ketoglutarate/Valine	AgeMonths	Participants age in months	32.6757	35.2505	0.926955	-0.357452	0.0266739	0.369797
aKG/Val	AgeMonths	Participants age in months	32.6757	35.2505	0.926955	-0.357452	0.0266739	0.369797
↑Alanine	MSEL VR	MSEL Visual Reception T-score	28.1846	31.9286	0.88274	-0.287124	0.0264186	0.369797
Lactate/Homocitrulline	MSEL RL	MSEL Receptive Language T-score	24.16	27.2886	0.885352	-0.301724	0.0274196	0.374462
Malate/Carnitine	MSEL VR	MSEL Visual Reception T-score	27.74	31.8501	0.870955	-0.318051	0.0273055	0.374462
Glycine/Valine	MSEL RL	MSEL Receptive Language T-score	24	27.212	0.881964	-0.332261	0.02772	0.37576
Lactate/Glutamine	MSEL RL	MSEL Receptive Language T-score	23.6176	27.2203	0.867648	-0.352467	0.0291229	0.391875
Malate/4-hydroxyproline	ADOS-2 SA CSS	ADOS-2 Module-1 or Module-2 Social Affect Calibrated Severity Score	6.05263	6.92638	0.873852	-0.52626	0.0300851	0.392243
Serine/Isoleucine	MSEL RL	MSEL Receptive Language T-score	23.2308	27.2199	0.853449	-0.394247	0.030222	0.392243
Taurine/Citrate	BMI	Participants body mass index	16.2065	16.736	0.968357	-0.303263	0.0298817	0.392243
Taurine/Malate	MSEL VR	MSEL Visual Reception T-score	38.1071	31.0384	1.22774	0.478202	0.0297291	0.392243
↓Carnitine2	MSEL DQ	MSEL Developmental Quotient (DQ)	59.4222	63.3907	0.937397	-0.242401	0.0295249	0.392243
↓Carnitine2	MSEL EL	MSEL Expressive Language T-score	26.0556	28.4988	0.914269	-0.243786	0.0308241	0.39724
Serine/Leucine	AgeMonths	Participants age in months	31.8387	35.2756	0.902569	-0.429085	0.0315793	0.40132
↑Alanine	ADOS-2 SA CSS	ADOS-2 Module-1 or Module-2 Social Affect Calibrated Severity Score	7.38095	6.79085	1.0869	0.351581	0.0314711	0.40132
Citrulline/Carnitine	MSEL VR	MSEL Visual Reception T-score	27.04	31.6695	0.853819	-0.386741	0.032594	0.408541
Malate/4-hydroxyproline	MSEL VR	MSEL Visual Reception T-score	27.4483	31.6874	0.866221	-0.355087	0.0325455	0.408541
Alanine/Kynurenine	MSEL VR	MSEL Visual Reception T-score	27.2857	31.6879	0.861077	-0.366053	0.0335789	0.412413
Arginine/Tyrosine	ADOS-2 SA CSS	ADOS-2 Module-1 or Module-2 Social Affect Calibrated Severity Score	7.61905	6.81902	1.11732	0.483478	0.0338044	0.412413
Homoserine/Carnitine	MSEL RL	MSEL Receptive Language T-score	23.8333	27.1756	0.877013	-0.339951	0.0335811	0.412413
Ornithine/Phenylalanine	MSEL DQ	MSEL Developmental Quotient (DQ)	57.1379	63.0596	0.906094	-0.377884	0.0335021	0.412413
Leucine	MSEL VR	MSEL Visual Reception T-score	27.129	31.7265	0.855091	-0.368116	0.0343534	0.416336
Alanine/Phenylalanine	MSEL VR	MSEL Visual Reception T-score	27.5714	31.6709	0.87056	-0.348071	0.0351241	0.417097
Lactate/Hexanoylcarnitine	MSEL RL	MSEL Receptive Language T-score	23.7576	27.2009	0.873412	-0.341032	0.0350731	0.417097
Malate/Proline	AgeMonths	Participants age in months	31.7586	35.2714	0.900408	-0.43595	0.0353279	0.417097
Serine/Isoleucine	AgeMonths	Participants age in months	31.5385	35.2558	0.894561	-0.462117	0.0351433	0.417097
Glutamic Acid/4-hydroxyproline	BMI	Participants body mass index	16.1861	16.7373	0.967068	-0.315078	0.0358298	0.420311
Lactate/Octanoylcarnitine	MSEL VR	MSEL Visual Reception T-score	27.8485	31.6463	0.879992	-0.321208	0.0361421	0.421274
Citrulline/Carnitine	MSEL RL	MSEL Receptive Language T-score	23.68	27.1483	0.872246	-0.357142	0.0369766	0.42292
Hypoxanthine/Carnitine	MSEL RL	MSEL Receptive Language T-score	23.28	27.1332	0.85799	-0.383183	0.03692	0.42292
Lactate/Octanoylcarnitine	AgeMonths	Participants age in months	32.2121	35.3275	0.911814	-0.3967	0.0366175	0.42292
Alanine/Phenylalanine	MSEL FM	MSEL Fine Motor T-score	25.3929	28.5902	0.888165	-0.345415	0.0376298	0.427718
Ornithine/Carnitine	AgeMonths	Participants age in months	37.7273	34.8772	1.08172	0.3768	0.0378701	0.427792
Pyruvate/Hexanoylcarnitine	ADOS-2 SA CSS	ADOS-2 Module-1 or Module-2 Social Affect Calibrated Severity Score	7.46429	6.81587	1.09513	0.396875	0.0382399	0.429319
Histidine/Leucine	MSEL EL	MSEL Expressive Language T-score	25.3939	28.2903	0.897619	-0.317892	0.0385663	0.429335
Homoserine/Leucine	BMI	Participants body mass index	17.9152	16.6337	1.07704	0.518906	0.0387483	0.429335
Hypoxanthine/4-hydroxyproline	MSEL EL	MSEL Expressive Language T-score	25.0714	28.2938	0.886109	-0.350193	0.0395643	0.429335
Lactate/Decanoylcarnitine	MSEL DQ	MSEL Developmental Quotient (DQ)	57.9355	62.9283	0.920659	-0.332067	0.039224	0.429335
Lactate/Histidine	AgeMonths	Participants age in months	31.9375	35.278	0.905309	-0.40893	0.0396489	0.429335
Lactate/Isoleucine	AgeMonths	Participants age in months	31.6071	35.2729	0.896074	-0.443691	0.0392205	0.429335
Arginine/Tyrosine	ADOS-2 Comparison Score	ADOS-2 Module-1 or Module-2 Comparison Severity Score	7.85714	7.07362	1.11077	0.46022	0.0404137	0.433733
Taurine/Citrate	ADOS-2 SA CSS	ADOS-2 Module-1 or Module-2 Social Affect Calibrated Severity Score	7.51852	6.81818	1.10272	0.416038	0.0405291	0.433733
Hypoxanthine/4-hydroxyproline	ADOS-2 SA CSS	ADOS-2 Module-1 or Module-2 Social Affect Calibrated Severity Score	7.45	6.85714	1.08646	0.398518	0.0409825	0.436035
Ethanolamine/4-hydroxyproline	MSEL EL	MSEL Expressive Language T-score	24.6923	28.2712	0.873409	-0.377877	0.0422011	0.439099
Lactate/Citrate	MSEL DQ	MSEL Developmental Quotient (DQ)	58.3548	62.9592	0.926867	-0.311637	0.0422303	0.439099
Lactate/Homocitrulline	MSEL DQ	MSEL Developmental Quotient (DQ)	58.96	63.0872	0.934579	-0.267843	0.0419116	0.439099
Pyruvate/Proline	AgeMonths	Participants age in months	31.871	35.279	0.903398	-0.413701	0.0419864	0.439099
Lactate/Ethanolamine	MSEL RL	MSEL Receptive Language T-score	24.129	27.1631	0.888302	-0.311449	0.0427936	0.442442
Glutamine	ADOS-2 SA CSS	ADOS-2 Module-1 or Module-2 Social Affect Calibrated Severity Score	7.5	6.81902	1.09987	0.424907	0.0443079	0.451893
Leu/Car	ADOS-2 RRB CSS	ADOS-2 Module-1 or Module-2 Restrictive Repetitive Calibrated Severity Score	8.47619	7.75077	1.09359	0.445562	0.0446955	0.451893
Leucine/Carnitine	ADOS-2 RRB CSS	ADOS-2 Module-1 or Module-2 Restrictive Repetitive Calibrated Severity Score	8.47619	7.75077	1.09359	0.445562	0.0446955	0.451893
Taurine/Phenylalanine	ADOS-2 SA CSS	ADOS-2 Module-1 or Module-2 Social Affect Calibrated Severity Score	7.42308	6.81677	1.08894	0.382515	0.0444806	0.451893
gamma-Aminobutyric Acid/Hexanoylcarnitine	ADOS-2 Comparison Score	ADOS-2 Module-1 or Module-2 Comparison Severity Score	8.09091	7.08133	1.14257	0.613813	0.0451656	0.454137
↓Hydroxyproline	MSEL EL	MSEL Expressive Language T-score	25.9219	28.4	0.912742	-0.252367	0.0459913	0.459913
Malate/4-hydroxyproline	MSEL EL	MSEL Expressive Language T-score	24.5862	28.2741	0.869567	-0.372764	0.0468903	0.466354
Xanthine/4-hydroxyproline	MSEL RL	MSEL Receptive Language T-score	23.56	27.1244	0.86859	-0.35694	0.0475528	0.470387
Alanine/Tyrosine	AgeMonths	Participants age in months	32.16	35.2152	0.913242	-0.408409	0.0478891	0.471167
Lactate/Palmitoylcarnitine	ADOS-2 Comparison Score	ADOS-2 Module-1 or Module-2 Comparison Severity Score	7.77419	7.04808	1.10302	0.393136	0.0481492	0.471192
Arginine/Carnitine	MSEL VR	MSEL Visual Reception T-score	27.1786	31.6944	0.857518	-0.360137	0.0489417	0.471958
Taurine/Phenylalanine	MSEL RL	MSEL Receptive Language T-score	24.1282	27.2565	0.885227	-0.301739	0.0485065	0.471958
↓C5DC	MSEL DQ	MSEL Developmental Quotient (DQ)	59.1587	63.1215	0.93722	-0.248238	0.0490011	0.471958
↑LacPyr↓(C6-C16)	AgeMonths	Participants age in months	33.5778	35.4638	0.946817	-0.236857	0.0501543	0.478033
↑TauXan↓C16	ADOS-2 SA CSS	ADOS-2 Module-1 or Module-2 Social Affect Calibrated Severity Score	7.45455	6.80645	1.09522	0.371932	0.0500081	0.478033
Taurine/4-hydroxyproline	MSEL RL	MSEL Receptive Language T-score	24	27.2603	0.880401	-0.311218	0.0505572	0.479376
Alanine/Valine	MSEL FM	MSEL Fine Motor T-score	25.2308	28.5869	0.8826	-0.352811	0.0509045	0.480181
↓Glutamine	MSEL VR	MSEL Visual Reception T-score	28	31.7489	0.88192	-0.297237	0.0515956	0.484205
Lactate/Phenylalanine	MSEL DQ	MSEL Developmental Quotient (DQ)	58.303	62.9828	0.925698	-0.306718	0.0523486	0.486284
Serine/Isoleucine	MSEL DQ	MSEL Developmental Quotient (DQ)	57.1923	63.019	0.90754	-0.368276	0.0521583	0.486284
Glycine/Lysine	ADOS-2 SA CSS	ADOS-2 Module-1 or Module-2 Social Affect Calibrated Severity Score	7.65	6.80734	1.12379	0.476145	0.0560165	0.515147
Hypoxanthine/4-hydroxyproline	ADOS-2 RRB CSS	ADOS-2 Module-1 or Module-2 Restrictive Repetitive Calibrated Severity Score	8.4	7.81494	1.07486	0.399359	0.0560187	0.515147
Lactate/Octanoylcarnitine	BMI	Participants body mass index	17.4935	16.6512	1.05058	0.386027	0.0564976	0.516953
Arginine/Leucine	BMI	Participants body mass index	18.3627	16.587	1.10705	0.480442	0.059568	0.519507
Glutamine	ADOS-2 Comparison Score	ADOS-2 Module-1 or Module-2 Comparison Severity Score	7.77273	7.06748	1.09979	0.412048	0.0587473	0.519507
Hypoxanthine/Carnitine	BMI	Participants body mass index	16.2752	16.7131	0.9738	-0.259525	0.0592662	0.519507
Lactate/Decanoylcarnitine	BMI	Participants body mass index	17.6898	16.6422	1.06295	0.429216	0.0594532	0.519507
Lactate/Phenylalanine	MSEL RL	MSEL Receptive Language T-score	23.7576	27.2026	0.873357	-0.325468	0.05766	0.519507
Lactate/Sarcosine	AgeMonths	Participants age in months	31.52	35.2542	0.894077	-0.438372	0.058974	0.519507
Malate/4-hydroxyproline	MSEL DQ	MSEL Developmental Quotient (DQ)	57.5172	63.0064	0.912879	-0.34305	0.0590281	0.519507
Taurine/Malate	MSEL DQ	MSEL Developmental Quotient (DQ)	71.0714	62.1706	1.14317	0.435249	0.0591478	0.519507
↑Gly↓BCAA	MSEL EL	MSEL Expressive Language T-score	26.2593	28.4354	0.923471	-0.218651	0.0596155	0.519507
↑LacPyr↓(C6-C16)	ADOS-2 Comparison Score	ADOS-2 Module-1 or Module-2 Comparison Severity Score	7.55556	7.03114	1.07458	0.287078	0.0587812	0.519507
Lactate/Malate	BMI	Participants body mass index	17.4324	16.6283	1.04836	0.347039	0.0599332	0.5198
Lactate/Methionine	AgeMonths	Participants age in months	32.1	35.257	0.910459	-0.384021	0.0614268	0.530241
Lactate/Citrate	MSEL RL	MSEL Receptive Language T-score	23.8065	27.1845	0.875735	-0.323039	0.062925	0.535594
Leucine	MSEL EL	MSEL Expressive Language T-score	25.3548	28.2628	0.897109	-0.309878	0.0628029	0.535594
Methionine/Leucine	MSEL RL	MSEL Receptive Language T-score	24.1613	27.2009	0.888255	-0.302234	0.0627963	0.535594
Pyruvate/Palmitoylcarnitine	MSEL VR	MSEL Visual Reception T-score	27.4231	31.6129	0.867465	-0.340655	0.0649887	0.548061
↑Alanine	BMI	Participants body mass index	17.2011	16.6254	1.03463	0.266522	0.0647979	0.548061
Decanoylcarnitine/Carnitine	BMI	Participants body mass index	16.2359	16.7445	0.969632	-0.278341	0.065314	0.548278
Taurine/Malate	MSEL FM	MSEL Fine Motor T-score	33.7857	28.049	1.20452	0.432919	0.0662818	0.551344
↑LacPyr↓(C6-C16)	ADOS-2 SA CSS	ADOS-2 Module-1 or Module-2 Social Affect Calibrated Severity Score	7.24074	6.79931	1.06492	0.264359	0.0662328	0.551344
Alanine/Lysine	MSEL DQ	MSEL Developmental Quotient (DQ)	58.4468	63.1086	0.92613	-0.278151	0.0672859	0.555698
Serine/Leucine	MSEL RL	MSEL Receptive Language T-score	24.129	27.203	0.886999	-0.302433	0.0674125	0.555698
Methionine/Carnitine	AgeMonths	Participants age in months	37.92	34.9153	1.08606	0.388469	0.067799	0.556378
Xanthine/Palmitoylcarnitine	BMI	Participants body mass index	16.2227	16.7323	0.969545	-0.280546	0.0692479	0.56573
Pyruvate/a-Ketoglutarate	AgeMonths	Participants age in months	32.5854	35.2895	0.923374	-0.32291	0.0699314	0.568776
↑Taurine	ADOS-2 SA CSS	ADOS-2 Module-1 or Module-2 Social Affect Calibrated Severity Score	7.32609	6.79139	1.07873	0.299818	0.0704978	0.570845
Malate/4-hydroxyproline	MSEL RL	MSEL Receptive Language T-score	23.8621	27.1734	0.878139	-0.319326	0.0710351	0.572662
Alanine/Phenylalanine	BMI	Participants body mass index	17.6695	16.6402	1.06186	0.418349	0.0722918	0.580237
Lactate/Asparagine	AgeMonths	Participants age in months	32	35.2426	0.907993	-0.390766	0.0727482	0.58135
↓Carnitine2	MSEL VR	MSEL Visual Reception T-score	29.2889	31.9115	0.917815	-0.200792	0.0731405	0.581944
Ethanolamine/4-hydroxyproline	ADOS-2 RRB CSS	ADOS-2 Module-1 or Module-2 Restrictive Repetitive Calibrated Severity Score	8.30435	7.79012	1.06601	0.340693	0.0762758	0.582975
Ethanolamine/Malate	MSEL FM	MSEL Fine Motor T-score	32.3939	28.0862	1.15338	0.361558	0.0757171	0.582975
Histidine/Leucine	MSEL DQ	MSEL Developmental Quotient (DQ)	58.5758	63.0387	0.929203	-0.287893	0.0748957	0.582975
Lactate/Ethanolamine	MSEL DQ	MSEL Developmental Quotient (DQ)	58.871	62.9249	0.935575	-0.273698	0.073968	0.582975
Lactate/Threonine	MSEL RL	MSEL Receptive Language T-score	24.1765	27.1793	0.889519	-0.289474	0.07654	0.582975
Lysine/a-Ketoglutarate	AgeMonths	Participants age in months	37.5357	34.8953	1.07567	0.349067	0.0744002	0.582975
Malate/Homoserine	MSEL RL	MSEL Receptive Language T-score	23.8148	27.1553	0.876985	-0.323856	0.0752634	0.582975
Pyruvate/4-hydroxyproline	MSEL VR	MSEL Visual Reception T-score	28.1111	31.7	0.886786	-0.285097	0.0767213	0.582975
Serine/Isoleucine	MSEL EL	MSEL Expressive Language T-score	25.2308	28.2389	0.893476	-0.321366	0.0757411	0.582975
Taurine/Citrate	AgeMonths	Participants age in months	37.0588	34.9201	1.06125	0.295826	0.0767743	0.582975
↓Citrate	ADOS-2 Comparison Score	ADOS-2 Module-1 or Module-2 Comparison Severity Score	7.46377	7.02888	1.06187	0.241279	0.0751165	0.582975
Glycine/Lysine	ADOS-2 RRB CSS	ADOS-2 Module-1 or Module-2 Restrictive Repetitive Calibrated Severity Score	8.35	7.76453	1.0754	0.374483	0.0773547	0.584955
Arginine/Carnitine	AgeMonths	Participants age in months	37.5	34.9017	1.07445	0.343979	0.077806	0.585947
Glycine/Carnitine	MSEL EL	MSEL Expressive Language T-score	26.0185	28.3047	0.919228	-0.235641	0.0794494	0.586956
Hypoxanthine/4-hydroxyproline	MSEL DQ	MSEL Developmental Quotient (DQ)	58.1429	62.8793	0.924674	-0.306458	0.0792592	0.586956
Hypoxanthine/Carnitine	ADOS-2 Comparison Score	ADOS-2 Module-1 or Module-2 Comparison Severity Score	7.83333	7.08682	1.10534	0.433503	0.0791214	0.586956
Lactate/Palmitoylcarnitine	MSEL VR	MSEL Visual Reception T-score	28.7692	31.7016	0.907501	-0.23484	0.0801852	0.586956
Ornithine/Lysine	AgeMonths	Participants age in months	37.0769	34.8671	1.06338	0.291393	0.079997	0.586956
Xanthine/Histidine	MSEL RL	MSEL Receptive Language T-score	23.8333	27.1106	0.879115	-0.325197	0.0798553	0.586956
↑Gly↓BCAA	BMI	Participants body mass index	17.3865	16.5729	1.04909	0.278959	0.0785796	0.586956
Citrulline/Carnitine	MSEL EL	MSEL Expressive Language T-score	24.8	28.2288	0.878535	-0.346956	0.0837293	0.594643
Ethanolamine/Citrate	AgeMonths	Participants age in months	37.4483	34.9188	1.07244	0.332385	0.0848662	0.594643
Glycine/Phenylalanine	ADOS-2 Comparison Score	ADOS-2 Module-1 or Module-2 Comparison Severity Score	7.66667	7.07099	1.08424	0.352149	0.0839556	0.594643
Lactate/Palmitoylcarnitine	MSEL DQ	MSEL Developmental Quotient (DQ)	59.4231	62.9909	0.94336	-0.228566	0.0847416	0.594643
Leucine/Glutarylcarnitine	ADOS-2 RRB CSS	ADOS-2 Module-1 or Module-2 Restrictive Repetitive Calibrated Severity Score	6.88889	7.84308	0.87834	-0.489184	0.0825437	0.594643
Malate/Proline	ADOS-2 RRB CSS	ADOS-2 Module-1 or Module-2 Restrictive Repetitive Calibrated Severity Score	8.41176	7.76292	1.08358	0.407897	0.0851799	0.594643
Methionine/Carnitine	MSEL FM	MSEL Fine Motor T-score	25.44	28.5275	0.89177	-0.321153	0.0849741	0.594643
Octanoylcarnitine/Citrate	ADOS-2 Comparison Score	ADOS-2 Module-1 or Module-2 Comparison Severity Score	6.38889	7.15385	0.89307	-0.432347	0.0826374	0.594643
Pyruvate/Palmitoylcarnitine	ADOS-2 SA CSS	ADOS-2 Module-1 or Module-2 Social Affect Calibrated Severity Score	7.47368	6.83333	1.09371	0.396126	0.0817523	0.594643
Xanthine/Histidine	MSEL EL	MSEL Expressive Language T-score	25.375	28.2641	0.897782	-0.314142	0.0845929	0.594643
↑Alanine	MSEL DQ	MSEL Developmental Quotient (DQ)	59.3385	63.2212	0.938585	-0.228581	0.0849133	0.594643
↓Carnitine1	MSEL FM	MSEL Fine Motor T-score	26.6026	28.7017	0.926865	-0.205528	0.083201	0.594643
↓Citrate	ADOS-2 RRB CSS	ADOS-2 Module-1 or Module-2 Restrictive Repetitive Calibrated Severity Score	8.07246	7.72563	1.04489	0.214775	0.0854597	0.594643
Alanine/a-Ketoglutarate	AgeMonths	Participants age in months	37.5	34.9101	1.07419	0.332669	0.0867853	0.598466
Lactate/Citrate	ADOS-2 Comparison Score	ADOS-2 Module-1 or Module-2 Comparison Severity Score	8	7.07831	1.13021	0.505792	0.0873172	0.598466
Lactate/Lysine	AgeMonths	Participants age in months	31.84	35.2144	0.904175	-0.395214	0.0871603	0.598466
↓Glutamine	ADOS-2 RRB CSS	ADOS-2 Module-1 or Module-2 Restrictive Repetitive Calibrated Severity Score	8.22581	7.76341	1.05956	0.29347	0.086816	0.598466
Arginine/Phenylalanine	BMI	Participants body mass index	18.4192	16.6042	1.10931	0.47576	0.0888315	0.604318
Malate/Proline	MSEL RL	MSEL Receptive Language T-score	24	27.1581	0.883714	-0.30298	0.0886536	0.604318
Glutamine	MSEL RL	MSEL Receptive Language T-score	24.3077	27.1607	0.894959	-0.288897	0.090541	0.613667
Ornithine/Phenylalanine	MSEL FM	MSEL Fine Motor T-score	25.3448	28.6	0.886183	-0.317822	0.0923007	0.616461
Pyruvate/Phenylalanine	AgeMonths	Participants age in months	32.25	35.2602	0.914629	-0.346712	0.0921881	0.616461
↓Carnitine1	ADOS-2 Comparison Score	ADOS-2 Module-1 or Module-2 Comparison Severity Score	7.5	7.04452	1.06466	0.252484	0.091854	0.616461
↓Leucine	MSEL VR	MSEL Visual Reception T-score	29.0938	31.7862	0.915295	-0.211236	0.0921691	0.616461
Malate/Proline	MSEL EL	MSEL Expressive Language T-score	25.2069	28.2329	0.89282	-0.308722	0.0927603	0.617277
Glycine/Hexanoylcarnitine	MSEL DQ	MSEL Developmental Quotient (DQ)	58.3667	62.8894	0.928085	-0.289366	0.0944113	0.619257
Glycine/Valine	MSEL DQ	MSEL Developmental Quotient (DQ)	58.7419	62.97	0.932856	-0.274657	0.0943116	0.619257
Lactate/Decanoylcarnitine	ADOS-2 Comparison Score	ADOS-2 Module-1 or Module-2 Comparison Severity Score	7.8125	7.07951	1.10354	0.427218	0.0936627	0.619257
↑Taurine	ADOS-2 Comparison Score	ADOS-2 Module-1 or Module-2 Comparison Severity Score	7.56522	7.04305	1.07414	0.278937	0.0943116	0.619257
Lactate/Methionine	MSEL RL	MSEL Receptive Language T-score	24.1333	27.1563	0.888682	-0.290545	0.0954996	0.621937
Lactate/Threonine	AgeMonths	Participants age in months	32.5882	35.2484	0.924531	-0.321325	0.0954869	0.621937
Lactate/4-hydroxyproline	MSEL VR	MSEL Visual Reception T-score	28.2857	31.679	0.892886	-0.270171	0.0960864	0.622373
Lactate/Ethanolamine	MSEL VR	MSEL Visual Reception T-score	28.4839	31.633	0.900447	-0.263241	0.0980575	0.622373
Lactate/Palmitoylcarnitine	ADOS-2 SA CSS	ADOS-2 Module-1 or Module-2 Social Affect Calibrated Severity Score	7.32258	6.82372	1.07311	0.302198	0.0970543	0.622373
Pyruvate/Phenylalanine	MSEL RL	MSEL Receptive Language T-score	24	27.1785	0.883051	-0.293984	0.0982874	0.622373
Threonine/Valine	ADOS-2 Comparison Score	ADOS-2 Module-1 or Module-2 Comparison Severity Score	6.5	7.15502	0.908454	-0.389154	0.0981807	0.622373
Xanthine/Palmitoylcarnitine	MSEL DQ	MSEL Developmental Quotient (DQ)	58.8857	62.815	0.937447	-0.257036	0.0967919	0.622373
Xanthine/Palmitoylcarnitine	MSEL RL	MSEL Receptive Language T-score	24.6857	27.1054	0.910731	-0.245742	0.0976881	0.622373
↑LacPyr	MSEL FM	MSEL Fine Motor T-score	27.0949	28.8583	0.938893	-0.165993	0.0982054	0.622373
↑Gly↓BCAA	MSEL FM	MSEL Fine Motor T-score	26.7654	28.7297	0.93163	-0.19233	0.0992912	0.626562
Alanine/Phenylalanine	MSEL EL	MSEL Expressive Language T-score	26.1071	28.1996	0.925799	-0.241314	0.100721	0.628325
Arginine/Carnitine	MSEL FM	MSEL Fine Motor T-score	25.7143	28.5491	0.900702	-0.292344	0.100188	0.628325
Arginine/Leucine	MSEL EL	MSEL Expressive Language T-score	25.9412	28.2414	0.918552	-0.248736	0.105717	0.628325
Arginine/Phenylalanine	MSEL EL	MSEL Expressive Language T-score	25.7586	28.2281	0.912516	-0.268645	0.102738	0.628325
Citrulline/Glutarylcarnitine	MSEL DQ	MSEL Developmental Quotient (DQ)	59.1875	62.9842	0.93972	-0.235577	0.101542	0.628325
Ethanolamine/Malate	ADOS-2 SA CSS	ADOS-2 Module-1 or Module-2 Social Affect Calibrated Severity Score	7.52	6.82243	1.10225	0.372639	0.104999	0.628325
Glycine/Isoleucine	AgeMonths	Participants age in months	33.1053	35.2234	0.939865	-0.275257	0.106525	0.628325
Hypoxanthine/Carnitine	MSEL EL	MSEL Expressive Language T-score	25.28	28.2573	0.894635	-0.309098	0.107631	0.628325
Lactate/Citrulline	MSEL RL	MSEL Receptive Language T-score	24.4857	27.1623	0.901458	-0.258971	0.104749	0.628325
Lactate/Histidine	MSEL RL	MSEL Receptive Language T-score	24.1562	27.1832	0.888647	-0.281747	0.109455	0.628325
Lactate/Malate	ADOS-2 Comparison Score	ADOS-2 Module-1 or Module-2 Comparison Severity Score	7.69231	7.06875	1.08821	0.341273	0.108487	0.628325
Lactate/Octanoylcarnitine	MSEL DQ	MSEL Developmental Quotient (DQ)	58.8485	62.8843	0.935822	-0.262175	0.103055	0.628325
Lactate/Palmitoylcarnitine	MSEL RL	MSEL Receptive Language T-score	24.7692	27.2301	0.909628	-0.229632	0.101825	0.628325
Lactate/Tyrosine	MSEL RL	MSEL Receptive Language T-score	24.2647	27.1728	0.892978	-0.271822	0.109871	0.628325
Lactate/Valine	ADOS-2 Comparison Score	ADOS-2 Module-1 or Module-2 Comparison Severity Score	8.07143	7.08459	1.13929	0.502295	0.109848	0.628325
Lactate/Valine	ADOS-2 SA CSS	ADOS-2 Module-1 or Module-2 Social Affect Calibrated Severity Score	7.64286	6.84894	1.11592	0.463892	0.107532	0.628325
Octanoylcarnitine/Carnitine	BMI	Participants body mass index	16.3227	16.7317	0.975554	-0.236066	0.104546	0.628325
Octanoylcarnitine/Valine	MSEL VR	MSEL Visual Reception T-score	35.5152	31.081	1.14267	0.311492	0.106176	0.628325
Serine/Isoleucine	BMI	Participants body mass index	17.6622	16.6523	1.06064	0.411897	0.107999	0.628325
Taurine/4-hydroxyproline	MSEL EL	MSEL Expressive Language T-score	25.5135	28.2907	0.901835	-0.27496	0.101789	0.628325
Taurine/a-Ketoglutarate	ADOS-2 SA CSS	ADOS-2 Module-1 or Module-2 Social Affect Calibrated Severity Score	7.33333	6.81935	1.07537	0.292311	0.108823	0.628325
Threonine/Valine	ADOS-2 RRB CSS	ADOS-2 Module-1 or Module-2 Restrictive Repetitive Calibrated Severity Score	7.22222	7.84498	0.920616	-0.385597	0.100398	0.628325
Xanthine/4-hydroxyproline	MSEL DQ	MSEL Developmental Quotient (DQ)	57.92	62.8597	0.921417	-0.309603	0.109597	0.628325
Xanthine/4-hydroxyproline	MSEL VR	MSEL Visual Reception T-score	27.68	31.552	0.877281	-0.309798	0.103358	0.628325
Xanthine/Palmitoylcarnitine	ADOS-2 SA CSS	ADOS-2 Module-1 or Module-2 Social Affect Calibrated Severity Score	7.47826	6.83828	1.09359	0.364066	0.108282	0.628325
gamma-Aminobutyric Acid/Hexanoylcarnitine	AgeMonths	Participants age in months	32.64	35.2511	0.925929	-0.338761	0.108478	0.628325
↑Arginine	BMI	Participants body mass index	17.5299	16.5997	1.05604	0.305225	0.102395	0.628325
↑Ornithine	ADOS-2 Comparison Score	ADOS-2 Module-1 or Module-2 Comparison Severity Score	7.41538	7.0424	1.05296	0.214481	0.107581	0.628325
↑Taurine	BMI	Participants body mass index	16.3903	16.7485	0.978611	-0.19242	0.102592	0.628325
↓C5DC	MSEL RL	MSEL Receptive Language T-score	24.9524	27.2664	0.915134	-0.212033	0.107104	0.628325
Arg/4hyp	ADOS-2 Comparison Score	ADOS-2 Module-1 or Module-2 Comparison Severity Score	7.8	7.06832	1.10351	0.369069	0.113355	0.631496
Arginine/4-hydroxyproline	ADOS-2 Comparison Score	ADOS-2 Module-1 or Module-2 Comparison Severity Score	7.8	7.06832	1.10351	0.369069	0.113355	0.631496
Glycine/Hexanoylcarnitine	MSEL RL	MSEL Receptive Language T-score	24.4333	27.1345	0.900453	-0.266456	0.113507	0.631496
Lactate/Citrate	ADOS-2 SA CSS	ADOS-2 Module-1 or Module-2 Social Affect Calibrated Severity Score	7.64286	6.84036	1.11732	0.462507	0.112278	0.631496
Ornithine/Phenylalanine	ADOS-2 RRB CSS	ADOS-2 Module-1 or Module-2 Restrictive Repetitive Calibrated Severity Score	8.2	7.78049	1.05392	0.288062	0.112751	0.631496
Pyruvate/4-hydroxyproline	MSEL DQ	MSEL Developmental Quotient (DQ)	58.6389	63.0022	0.930744	-0.265457	0.113299	0.631496
Serine/Leucine	MSEL DQ	MSEL Developmental Quotient (DQ)	58.7419	62.9786	0.932728	-0.269036	0.113908	0.631496
a-Ketoglutarate/Valine	MSEL DQ	MSEL Developmental Quotient (DQ)	59.1622	62.9455	0.939895	-0.242541	0.114221	0.631496
aKG/Val	MSEL DQ	MSEL Developmental Quotient (DQ)	59.1622	62.9455	0.939895	-0.242541	0.114221	0.631496
↑Alanine	ADOS-2 Comparison Score	ADOS-2 Module-1 or Module-2 Comparison Severity Score	7.54762	7.05229	1.07024	0.269844	0.112948	0.631496
↑LacPyr	ADOS-2 RRB CSS	ADOS-2 Module-1 or Module-2 Restrictive Repetitive Calibrated Severity Score	8.05882	7.70881	1.0454	0.201138	0.111034	0.631496
Alanine/Lysine	MSEL FM	MSEL Fine Motor T-score	26.2553	28.5876	0.918417	-0.229633	0.120503	0.633352
Glycine/Citrate	ADOS-2 Comparison Score	ADOS-2 Module-1 or Module-2 Comparison Severity Score	7.53846	7.06189	1.06749	0.265649	0.121566	0.633352
Glycine/Hexanoylcarnitine	MSEL VR	MSEL Visual Reception T-score	28.0333	31.6095	0.886863	-0.279991	0.119473	0.633352
Histidine/Leucine	MSEL RL	MSEL Receptive Language T-score	24.7576	27.1871	0.910637	-0.241999	0.119748	0.633352
Hypoxanthine/Carnitine	MSEL VR	MSEL Visual Reception T-score	27.96	31.5327	0.886698	-0.289344	0.120652	0.633352
Lactate	AgeMonths	Participants age in months	32.4615	35.2102	0.921936	-0.338956	0.116703	0.633352
Lactate/Ethanolamine	AgeMonths	Participants age in months	32.5484	35.2339	0.92378	-0.318931	0.117769	0.633352
Lactate/Glycine	MSEL RL	MSEL Receptive Language T-score	24.4828	27.1282	0.902484	-0.262315	0.118412	0.633352
Lactate/Kynurenine	AgeMonths	Participants age in months	32.8333	35.2099	0.932504	-0.301946	0.122318	0.633352
Lactate/Phenylalanine	BMI	Participants body mass index	17.3798	16.6475	1.04399	0.318017	0.117221	0.633352
Lactate/Taurine	MSEL RL	MSEL Receptive Language T-score	24.7949	27.1594	0.912939	-0.230603	0.122517	0.633352
Lactate/a-Ketoglutarate	ADOS-2 SA CSS	ADOS-2 Module-1 or Module-2 Social Affect Calibrated Severity Score	7.5	6.83436	1.0974	0.380977	0.115397	0.633352
Leu/Val	MSEL EL	MSEL Expressive Language T-score	25.7812	28.2232	0.913478	-0.258228	0.116693	0.633352
Leucine/Valine	MSEL EL	MSEL Expressive Language T-score	25.7812	28.2232	0.913478	-0.258228	0.116693	0.633352
Methionine/Leucine	MSEL DQ	MSEL Developmental Quotient (DQ)	58.6452	62.985	0.931097	-0.270848	0.120488	0.633352
Methionine/Leucine	MSEL EL	MSEL Expressive Language T-score	25.7097	28.2393	0.910421	-0.264608	0.119898	0.633352
Octanoylcarnitine/Isoleucine	MSEL FM	MSEL Fine Motor T-score	30.92	28.1438	1.09864	0.290008	0.120501	0.633352
Pyruvate/Palmitoylcarnitine	ADOS-2 Comparison Score	ADOS-2 Module-1 or Module-2 Comparison Severity Score	7.73684	7.07716	1.09321	0.371917	0.122017	0.633352
Taurine/Malate	MSEL RL	MSEL Receptive Language T-score	31	26.7335	1.15959	0.341234	0.116844	0.633352
Taurine/Phenylalanine	ADOS-2 Comparison Score	ADOS-2 Module-1 or Module-2 Comparison Severity Score	7.69231	7.06522	1.08876	0.336268	0.120917	0.633352
↑Ethanolamine	ADOS-2 Comparison Score	ADOS-2 Module-1 or Module-2 Comparison Severity Score	7.52083	7.05034	1.06673	0.252631	0.119401	0.633352
↓Carnitine2	ADOS-2 Comparison Score	ADOS-2 Module-1 or Module-2 Comparison Severity Score	7.45614	7.04844	1.05784	0.227172	0.118023	0.633352
↓Carnitine2	ADOS-2 SA CSS	ADOS-2 Module-1 or Module-2 Social Affect Calibrated Severity Score	7.19298	6.80969	1.05629	0.22353	0.122439	0.633352
Alanine/Tyrosine	ADOS-2 SA CSS	ADOS-2 Module-1 or Module-2 Social Affect Calibrated Severity Score	7.46154	6.83881	1.09106	0.400598	0.125073	0.63597
Glycine/Phenylalanine	ADOS-2 SA CSS	ADOS-2 Module-1 or Module-2 Social Affect Calibrated Severity Score	7.375	6.82407	1.08073	0.325872	0.124899	0.63597
Hexanoylcarnitine/Leucine	AgeMonths	Participants age in months	33.2571	35.261	0.943172	-0.266558	0.12375	0.63597
Lactate/Tyrosine	ADOS-2 Comparison Score	ADOS-2 Module-1 or Module-2 Comparison Severity Score	7.83333	7.07622	1.10699	0.403746	0.123828	0.63597
Pyruvate/4-hydroxyproline	MSEL RL	MSEL Receptive Language T-score	24.3056	27.1891	0.893944	-0.261969	0.125109	0.63597
↑Ornithine	ADOS-2 RRB CSS	ADOS-2 Module-1 or Module-2 Restrictive Repetitive Calibrated Severity Score	8.04615	7.74912	1.03833	0.188584	0.124695	0.63597
Glycine/Isoleucine	ADOS-2 SA CSS	ADOS-2 Module-1 or Module-2 Social Affect Calibrated Severity Score	7.45	6.82622	1.09138	0.362849	0.12632	0.6381
Lactate/Citrulline	AgeMonths	Participants age in months	32.8857	35.2316	0.933415	-0.286818	0.126037	0.6381
Lactate/Palmitoylcarnitine	BMI	Participants body mass index	17.1941	16.6493	1.03272	0.246695	0.1267	0.6381
Malate/4-hydroxyproline	ADOS-2 Comparison Score	ADOS-2 Module-1 or Module-2 Comparison Severity Score	6.52632	7.15951	0.911559	-0.362631	0.126923	0.6381
Alanine/Carnitine	MSEL EL	MSEL Expressive Language T-score	25.5429	28.2468	0.904276	-0.2651	0.129521	0.641544
Alanine/Carnitine	MSEL FM	MSEL Fine Motor T-score	25.8286	28.5649	0.904206	-0.263319	0.130397	0.641544
Arginine/Tyrosine	MSEL FM	MSEL Fine Motor T-score	26.1429	28.6004	0.914072	-0.248349	0.129039	0.641544
Glycine/Carnitine	ADOS-2 SA CSS	ADOS-2 Module-1 or Module-2 Social Affect Calibrated Severity Score	7.28947	6.82143	1.06861	0.267471	0.129824	0.641544
Methionine/Leucine	BMI	Participants body mass index	18.1224	16.6118	1.09094	0.402358	0.130684	0.641544
Pyruvate/4-hydroxyproline	MSEL FM	MSEL Fine Motor T-score	25.8056	28.5913	0.902567	-0.26446	0.129137	0.641544
Taurine/4-hydroxyproline	AgeMonths	Participants age in months	36.973	34.8894	1.05972	0.266478	0.128541	0.641544
a-Ketoglutarate/Valine	MSEL RL	MSEL Receptive Language T-score	24.6486	27.1612	0.907494	-0.239279	0.131113	0.641544
aKG/Val	MSEL RL	MSEL Receptive Language T-score	24.6486	27.1612	0.907494	-0.239279	0.131113	0.641544
↓Carnitine1	MSEL DQ	MSEL Developmental Quotient (DQ)	60.0256	63.1647	0.950304	-0.18507	0.130072	0.641544
↑Ethanolamine	AgeMonths	Participants age in months	36.4242	34.8585	1.04492	0.200662	0.133388	0.650934
Glycine/a-Ketoglutarate	MSEL EL	MSEL Expressive Language T-score	25.6667	28.243	0.908781	-0.255207	0.134212	0.652795
Lactate/Serine	MSEL DQ	MSEL Developmental Quotient (DQ)	58.9259	62.8872	0.937009	-0.259239	0.134483	0.652795
Lactate/Phenylalanine	MSEL EL	MSEL Expressive Language T-score	25.5758	28.2328	0.905889	-0.264067	0.135905	0.657952
Citrulline/Glutarylcarnitine	MSEL RL	MSEL Receptive Language T-score	24.75	27.2099	0.909594	-0.222745	0.139047	0.659358
Eta/Kyn	ADOS-2 RRB CSS	ADOS-2 Module-1 or Module-2 Restrictive Repetitive Calibrated Severity Score	8.34615	7.76087	1.07541	0.323404	0.138523	0.659358
Ethanolamine/Kynurenine	ADOS-2 RRB CSS	ADOS-2 Module-1 or Module-2 Restrictive Repetitive Calibrated Severity Score	8.34615	7.76087	1.07541	0.323404	0.138523	0.659358
Ethanolamine/Malate	MSEL DQ	MSEL Developmental Quotient (DQ)	68.2121	62.278	1.09528	0.299906	0.144482	0.659358
Glutamine	MSEL FM	MSEL Fine Motor T-score	25.6923	28.5603	0.899583	-0.285598	0.139742	0.659358
Glycine/Valine	MSEL VR	MSEL Visual Reception T-score	28.1613	31.6467	0.889866	-0.266191	0.142849	0.659358
Lactate/Decanoylcarnitine	AgeMonths	Participants age in months	33	35.2609	0.935882	-0.286911	0.137013	0.659358
Lactate/Decanoylcarnitine	MSEL RL	MSEL Receptive Language T-score	24.6452	27.1261	0.908541	-0.243354	0.144298	0.659358
Lactate/Leucine	ADOS-2 SA CSS	ADOS-2 Module-1 or Module-2 Social Affect Calibrated Severity Score	7.61538	6.84384	1.11274	0.441949	0.144464	0.659358
Lys/Gln	MSEL EL	MSEL Expressive Language T-score	25.6	28.186	0.908251	-0.273369	0.142068	0.659358
Lysine/Glutamine	MSEL EL	MSEL Expressive Language T-score	25.6	28.186	0.908251	-0.273369	0.142068	0.659358
Ornithine/Citrate	MSEL EL	MSEL Expressive Language T-score	26.2745	28.2601	0.929739	-0.204321	0.137791	0.659358
Taurine/a-Ketoglutarate	ADOS-2 Comparison Score	ADOS-2 Module-1 or Module-2 Comparison Severity Score	7.58333	7.06129	1.07393	0.275038	0.142512	0.659358
a-Ketoglutarate/Valine	MSEL EL	MSEL Expressive Language T-score	25.8378	28.2179	0.915655	-0.240636	0.141885	0.659358
aKG/Val	MSEL EL	MSEL Expressive Language T-score	25.8378	28.2179	0.915655	-0.240636	0.141885	0.659358
gamma-Aminobutyric Acid/Hexanoylcarnitine	ADOS-2 RRB CSS	ADOS-2 Module-1 or Module-2 Restrictive Repetitive Calibrated Severity Score	8.36364	7.7741	1.07583	0.391191	0.144294	0.659358
gamma-Aminobutyric Acid/Hexanoylcarnitine	MSEL EL	MSEL Expressive Language T-score	31.68	27.8627	1.13701	0.335046	0.141792	0.659358
↑Ethanolamine	ADOS-2 SA CSS	ADOS-2 Module-1 or Module-2 Social Affect Calibrated Severity Score	7.25	6.81208	1.06429	0.241406	0.141588	0.659358
↑LacPyr↓(C6-C16)	BMI	Participants body mass index	17.0264	16.6374	1.02339	0.183195	0.140192	0.659358
↓Citrate	BMI	Participants body mass index	17.008	16.6229	1.02317	0.177865	0.143373	0.659358
↓Leucine	BMI	Participants body mass index	17.3655	16.6045	1.04584	0.258777	0.136676	0.659358
↓Leucine	MSEL DQ	MSEL Developmental Quotient (DQ)	60.0938	63.1011	0.95234	-0.185297	0.14175	0.659358
↓Leucine	MSEL RL	MSEL Receptive Language T-score	25.2656	27.269	0.926534	-0.186733	0.139728	0.659358
Lactate/a-Ketoglutarate	ADOS-2 Comparison Score	ADOS-2 Module-1 or Module-2 Comparison Severity Score	7.75	7.07669	1.09515	0.359476	0.145838	0.663891
Lactate/Homocitrulline	MSEL FM	MSEL Fine Motor T-score	26.64	28.566	0.932577	-0.196747	0.147542	0.665031
Lactate/Tyrosine	MSEL DQ	MSEL Developmental Quotient (DQ)	59.3529	62.9158	0.943371	-0.229554	0.147533	0.665031
Xanthine/Palmitoylcarnitine	MSEL FM	MSEL Fine Motor T-score	25.9143	28.3279	0.914798	-0.242739	0.146898	0.665031
↓Hydroxyproline	MSEL FM	MSEL Fine Motor T-score	26.7344	28.6575	0.932894	-0.187583	0.147044	0.665031
Threonine/Valine	BMI	Participants body mass index	18.3221	16.613	1.10288	0.413969	0.148404	0.667269
Lactate/Proline	AgeMonths	Participants age in months	32.5357	35.2175	0.923851	-0.312728	0.148933	0.668009
Pyruvate/Phenylalanine	BMI	Participants body mass index	17.3643	16.652	1.04278	0.304534	0.149322	0.668114
Alanine/Lysine	ADOS-2 SA CSS	ADOS-2 Module-1 or Module-2 Social Affect Calibrated Severity Score	7.31034	6.81447	1.07277	0.285891	0.149851	0.66828
Citrulline/Carnitine	AgeMonths	Participants age in months	37.24	34.9513	1.06548	0.298799	0.150129	0.66828
Histidine/Leucine	MSEL VR	MSEL Visual Reception T-score	28.6061	31.6667	0.903349	-0.241873	0.151185	0.66828
Lactate/Decanoylcarnitine	ADOS-2 SA CSS	ADOS-2 Module-1 or Module-2 Social Affect Calibrated Severity Score	7.375	6.84404	1.07758	0.337875	0.151044	0.66828
Octanoylcarnitine/Sarcosine	AgeMonths	Participants age in months	37.2593	34.9935	1.06475	0.291898	0.151174	0.66828
Lactate/Arginine	MSEL DQ	MSEL Developmental Quotient (DQ)	59.6098	62.9626	0.946748	-0.212531	0.152064	0.670548
Alanine/Lysine	MSEL RL	MSEL Receptive Language T-score	24.7234	27.2284	0.908001	-0.221029	0.153425	0.674924
Lactate/Alanine	MSEL DQ	MSEL Developmental Quotient (DQ)	59.6667	62.8858	0.94881	-0.214814	0.154459	0.676087
Lactate/Urate	BMI	Participants body mass index	17.1465	16.6651	1.02889	0.244705	0.156514	0.676087
Leu/Val	MSEL FM	MSEL Fine Motor T-score	26.3125	28.5558	0.921442	-0.232804	0.154954	0.676087
Leucine/Valine	MSEL FM	MSEL Fine Motor T-score	26.3125	28.5558	0.921442	-0.232804	0.154954	0.676087
Octanoylcarnitine/Asparagine	AgeMonths	Participants age in months	36.5652	34.9685	1.04566	0.213649	0.156092	0.676087
Octanoylcarnitine/Carnitine	MSEL VR	MSEL Visual Reception T-score	35.1379	31.1558	1.12781	0.285025	0.156645	0.676087
Serine/Citrate	ADOS-2 Comparison Score	ADOS-2 Module-1 or Module-2 Comparison Severity Score	7.55172	7.07571	1.06727	0.271574	0.156506	0.676087
Taurine/Ethanolamine	MSEL FM	MSEL Fine Motor T-score	32.32	28.2046	1.14591	0.335262	0.155549	0.676087
Lactate/4-hydroxyproline	MSEL FM	MSEL Fine Motor T-score	26	28.5705	0.91003	-0.246075	0.158852	0.678282
Lactate/Octanoylcarnitine	ADOS-2 Comparison Score	ADOS-2 Module-1 or Module-2 Comparison Severity Score	7.8125	7.07951	1.10354	0.3909	0.157836	0.678282
Phenylalanine/Citrate	ADOS-2 RRB CSS	ADOS-2 Module-1 or Module-2 Restrictive Repetitive Calibrated Severity Score	8.14706	7.75641	1.05036	0.240249	0.159007	0.678282
Threonine/Valine	MSEL EL	MSEL Expressive Language T-score	25.2692	28.2203	0.895426	-0.286968	0.158	0.678282
Xanthine/Palmitoylcarnitine	MSEL EL	MSEL Expressive Language T-score	26.2571	28.2506	0.929437	-0.214426	0.158906	0.678282
Lactate/Phenylalanine	MSEL VR	MSEL Visual Reception T-score	28.7576	31.6272	0.909268	-0.230383	0.160835	0.682913
Ornithine/a-Ketoglutarate	ADOS-2 SA CSS	ADOS-2 Module-1 or Module-2 Social Affect Calibrated Severity Score	7.25	6.84472	1.05921	0.261882	0.160839	0.682913
Glycine/Leucine	AgeMonths	Participants age in months	33.1667	35.1834	0.94268	-0.264023	0.162382	0.687868
Arginine/Leucine	MSEL RL	MSEL Receptive Language T-score	24.8235	27.1789	0.913339	-0.226269	0.162991	0.688852
Arginine/Phenylalanine	MSEL RL	MSEL Receptive Language T-score	24.7586	27.1578	0.911658	-0.235523	0.164382	0.690766
Glycine/Lysine	MSEL VR	MSEL Visual Reception T-score	28	31.6059	0.88591	-0.275117	0.165331	0.690766
Lactate/Homocitrulline	MSEL VR	MSEL Visual Reception T-score	29.16	31.6913	0.920127	-0.19649	0.164683	0.690766
Taurine/Ethanolamine	MSEL VR	MSEL Visual Reception T-score	35.88	31.2068	1.14975	0.315721	0.16415	0.690766
↓Carnitine2	MSEL FM	MSEL Fine Motor T-score	27.0333	28.6683	0.942969	-0.157652	0.165121	0.690766
Hypoxanthine/4-hydroxyproline	MSEL VR	MSEL Visual Reception T-score	28.4286	31.5308	0.901614	-0.247501	0.167053	0.695887
Phenylalanine/Citrate	BMI	Participants body mass index	17.1884	16.6453	1.03263	0.236696	0.167317	0.695887
↓Carnitine1	MSEL RL	MSEL Receptive Language T-score	25.3974	27.2673	0.931425	-0.167773	0.1683	0.698387
Alanine/Carnitine	ADOS-2 SA CSS	ADOS-2 Module-1 or Module-2 Social Affect Calibrated Severity Score	7.34783	6.83901	1.0744	0.298466	0.170829	0.700299
Glycine/Methionine	ADOS-2 Comparison Score	ADOS-2 Module-1 or Module-2 Comparison Severity Score	7.61905	7.07951	1.07621	0.308036	0.170805	0.700299
Lactate/Citrate	MSEL VR	MSEL Visual Reception T-score	28.8065	31.6116	0.911262	-0.227721	0.171057	0.700299
Lactate/Histidine	MSEL EL	MSEL Expressive Language T-score	25.7188	28.2349	0.910885	-0.247925	0.170773	0.700299
Lactate/Homoserine	MSEL RL	MSEL Receptive Language T-score	24.2857	27.1343	0.895018	-0.261568	0.169405	0.700299
Malate/Proline	MSEL DQ	MSEL Developmental Quotient (DQ)	59.069	62.8953	0.939163	-0.241992	0.169541	0.700299
↓Carnitine1	MSEL VR	MSEL Visual Reception T-score	29.4872	31.7995	0.927284	-0.169628	0.171642	0.701126
Lactate/Malate	ADOS-2 SA CSS	ADOS-2 Module-1 or Module-2 Social Affect Calibrated Severity Score	7.38462	6.83125	1.081	0.300339	0.173608	0.706062
Ornithine/a-Ketoglutarate	ADOS-2 Comparison Score	ADOS-2 Module-1 or Module-2 Comparison Severity Score	7.54167	7.08385	1.06463	0.271327	0.174791	0.706062
Pyruvate/Sarcosine	MSEL FM	MSEL Fine Motor T-score	31.0294	28.1771	1.10123	0.256128	0.17407	0.706062
Taurine/Palmitoylcarnitine	ADOS-2 RRB CSS	ADOS-2 Module-1 or Module-2 Restrictive Repetitive Calibrated Severity Score	7.04762	7.84161	0.898746	-0.367383	0.175268	0.706062
↑Alanine	MSEL RL	MSEL Receptive Language T-score	25.2462	27.2765	0.925564	-0.180074	0.175551	0.706062
↑LacPyr	BMI	Participants body mass index	16.8976	16.623	1.01652	0.135875	0.175524	0.706062
↓aKG2	AgeMonths	Participants age in months	36.4138	34.8884	1.04372	0.193636	0.174609	0.706062
Glycine/Citrate	ADOS-2 SA CSS	ADOS-2 Module-1 or Module-2 Social Affect Calibrated Severity Score	7.25641	6.8241	1.06335	0.240526	0.177422	0.710466
Lactate/Proline	MSEL RL	MSEL Receptive Language T-score	24.5	27.1215	0.903341	-0.247602	0.177089	0.710466
Lactate/Urate	ADOS-2 Comparison Score	ADOS-2 Module-1 or Module-2 Comparison Severity Score	7.68421	7.08257	1.08495	0.330905	0.177956	0.711046
Lactate/Glutamine	MSEL EL	MSEL Expressive Language T-score	25.7647	28.2246	0.912845	-0.23876	0.181328	0.715444
Leu/Val	MSEL DQ	MSEL Developmental Quotient (DQ)	59.4062	62.9335	0.943953	-0.223328	0.181402	0.715444
Leucine/Valine	MSEL DQ	MSEL Developmental Quotient (DQ)	59.4062	62.9335	0.943953	-0.223328	0.181402	0.715444
Pyruvate/Palmitoylcarnitine	MSEL DQ	MSEL Developmental Quotient (DQ)	59	62.8151	0.939265	-0.245132	0.180394	0.715444
Taurine/Citrate	ADOS-2 Comparison Score	ADOS-2 Module-1 or Module-2 Comparison Severity Score	7.59259	7.07524	1.07312	0.280358	0.179879	0.715444
↑Arginine	MSEL EL	MSEL Expressive Language T-score	26.5536	28.2783	0.939009	-0.176511	0.181228	0.715444
Ethanolamine/Citrate	ADOS-2 SA CSS	ADOS-2 Module-1 or Module-2 Social Affect Calibrated Severity Score	7.34783	6.83901	1.0744	0.294209	0.183173	0.717788
Ethanolamine/Malate	MSEL RL	MSEL Receptive Language T-score	30.1515	26.7478	1.12725	0.268191	0.182995	0.717788
Lactate/Valine	MSEL RL	MSEL Receptive Language T-score	24.5	27.133	0.902958	-0.242924	0.183117	0.717788
Lactate/Homocitrulline	MSEL EL	MSEL Expressive Language T-score	26.3	28.2528	0.930881	-0.193384	0.183988	0.719438
Alanine/Carnitine	MSEL DQ	MSEL Developmental Quotient (DQ)	58.7714	62.9675	0.933361	-0.23958	0.186274	0.722511
Alanine/Tyrosine	ADOS-2 Comparison Score	ADOS-2 Module-1 or Module-2 Comparison Severity Score	7.61538	7.09254	1.07372	0.328059	0.191638	0.722511
Glycine/Hexanoylcarnitine	MSEL EL	MSEL Expressive Language T-score	26.3667	28.167	0.936083	-0.201163	0.187849	0.722511
Homoserine/Leucine	AgeMonths	Participants age in months	33.1786	35.1741	0.943267	-0.259485	0.18692	0.722511
Lactate/Isoleucine	ADOS-2 SA CSS	ADOS-2 Module-1 or Module-2 Social Affect Calibrated Severity Score	7.5	6.84639	1.09547	0.375769	0.190707	0.722511
Lactate/Leucine	ADOS-2 Comparison Score	ADOS-2 Module-1 or Module-2 Comparison Severity Score	7.92308	7.08408	1.11843	0.424875	0.18701	0.722511
Lactate/Tyrosine	ADOS-2 SA CSS	ADOS-2 Module-1 or Module-2 Social Affect Calibrated Severity Score	7.38889	6.84451	1.07953	0.320972	0.189972	0.722511
Lactate/Urate	ADOS-2 SA CSS	ADOS-2 Module-1 or Module-2 Social Affect Calibrated Severity Score	7.36842	6.84404	1.07662	0.309968	0.191755	0.722511
Lys/Gln	BMI	Participants body mass index	17.618	16.6558	1.05777	0.346003	0.189239	0.722511
Lysine/Glutamine	BMI	Participants body mass index	17.618	16.6558	1.05777	0.346003	0.189239	0.722511
Octanoylcarnitine/Sarcosine	BMI	Participants body mass index	16.376	16.7283	0.978937	-0.199789	0.187913	0.722511
Pyruvate/Homocitrulline	MSEL RL	MSEL Receptive Language T-score	24.9268	27.1579	0.917848	-0.205741	0.190439	0.722511
Serine/Urate	ADOS-2 SA CSS	ADOS-2 Module-1 or Module-2 Social Affect Calibrated Severity Score	7.35	6.84356	1.074	0.3027	0.185274	0.722511
Taurine/4-hydroxyproline	ADOS-2 RRB CSS	ADOS-2 Module-1 or Module-2 Restrictive Repetitive Calibrated Severity Score	8.27586	7.78302	1.06332	0.273075	0.19188	0.722511
↑C10C8C6	MSEL FM	MSEL Fine Motor T-score	27.1263	28.5631	0.949697	-0.142261	0.191671	0.722511
↑Malate	ADOS-2 RRB CSS	ADOS-2 Module-1 or Module-2 Restrictive Repetitive Calibrated Severity Score	8.13793	7.76341	1.04824	0.234869	0.188419	0.722511
↑Malate	ADOS-2 SA CSS	ADOS-2 Module-1 or Module-2 Social Affect Calibrated Severity Score	6.48276	6.90852	0.938372	-0.25292	0.18665	0.722511
↓aKG1	MSEL EL	MSEL Expressive Language T-score	26.3966	28.2756	0.933544	-0.182338	0.190206	0.722511
Alanine/Valine	MSEL DQ	MSEL Developmental Quotient (DQ)	58.9615	62.9131	0.93719	-0.245774	0.195441	0.725702
Lactate/4-hydroxyproline	MSEL DQ	MSEL Developmental Quotient (DQ)	59.3429	62.9393	0.942859	-0.219243	0.193255	0.725702
Lactate/Citrate	MSEL EL	MSEL Expressive Language T-score	25.9677	28.1953	0.920996	-0.227556	0.195048	0.725702
Lactate/Isoleucine	MSEL RL	MSEL Receptive Language T-score	24.3929	27.1279	0.899179	-0.248811	0.195223	0.725702
Lactate/Phenylalanine	MSEL FM	MSEL Fine Motor T-score	26.6061	28.4978	0.933617	-0.201009	0.193563	0.725702
Octanoylcarnitine/Valine	ADOS-2 Comparison Score	ADOS-2 Module-1 or Module-2 Comparison Severity Score	6.69565	7.15361	0.935983	-0.26818	0.195503	0.725702
↓Carnitine1	ADOS-2 SA CSS	ADOS-2 Module-1 or Module-2 Social Affect Calibrated Severity Score	7.16667	6.81849	1.05106	0.197106	0.194812	0.725702
Arginine/Phenylalanine	MSEL FM	MSEL Fine Motor T-score	26.0345	28.5757	0.911071	-0.244913	0.196483	0.727861
Xanthine/4-hydroxyproline	MSEL FM	MSEL Fine Motor T-score	25.56	28.4095	0.899699	-0.269523	0.197088	0.72863
Alanine/Tyrosine	BMI	Participants body mass index	17.4715	16.6619	1.04859	0.327172	0.198711	0.730159
Arginine/Carnitine	BMI	Participants body mass index	17.2137	16.6693	1.03266	0.258458	0.202276	0.730159
Arginine/Phenylalanine	MSEL DQ	MSEL Developmental Quotient (DQ)	59.3793	62.936	0.943487	-0.224506	0.202068	0.730159
Citrulline/Carnitine	BMI	Participants body mass index	17.2431	16.6686	1.03446	0.274476	0.199101	0.730159
Decanoylcarnitine/Carnitine	AgeMonths	Participants age in months	36.6944	34.9934	1.04861	0.222213	0.200025	0.730159
Decanoylcarnitine/Valine	ADOS-2 Comparison Score	ADOS-2 Module-1 or Module-2 Comparison Severity Score	6.69565	7.15361	0.935983	-0.266255	0.202657	0.730159
Glycine/Carnitine	ADOS-2 Comparison Score	ADOS-2 Module-1 or Module-2 Comparison Severity Score	7.47368	7.07143	1.05688	0.222895	0.199725	0.730159
Glycine/Isoleucine	ADOS-2 Comparison Score	ADOS-2 Module-1 or Module-2 Comparison Severity Score	7.6	7.08232	1.0731	0.294714	0.20117	0.730159
Lactate/Asparagine	MSEL RL	MSEL Receptive Language T-score	24.5926	27.1106	0.90712	-0.238144	0.200732	0.730159
Lactate/Taurine	MSEL DQ	MSEL Developmental Quotient (DQ)	59.9487	62.9039	0.95302	-0.189664	0.202572	0.730159
Octanoylcarnitine/Isoleucine	MSEL VR	MSEL Visual Reception T-score	34.88	31.2039	1.11781	0.269141	0.202689	0.730159
Taurine/Phenylalanine	MSEL EL	MSEL Expressive Language T-score	26.2564	28.237	0.92986	-0.201499	0.200552	0.730159
↓Leucine	MSEL EL	MSEL Expressive Language T-score	26.6094	28.2989	0.940299	-0.166588	0.201636	0.730159
Lactate/Glutarylcarnitine	AgeMonths	Participants age in months	32.9655	35.2532	0.935106	-0.268741	0.203827	0.732207
Ornithine/Lysine	MSEL FM	MSEL Fine Motor T-score	26.1282	28.5577	0.914926	-0.221149	0.205111	0.732207
Ornithine/Phenylalanine	MSEL VR	MSEL Visual Reception T-score	28.6207	31.6149	0.905291	-0.232327	0.205258	0.732207
Serine/Citrate	BMI	Participants body mass index	17.2956	16.6462	1.03901	0.254062	0.205072	0.732207
Taurine/Citrate	MSEL EL	MSEL Expressive Language T-score	30.5294	27.8747	1.09524	0.240881	0.204885	0.732207
Malate/4-hydroxyproline	MSEL FM	MSEL Fine Motor T-score	25.8966	28.5439	0.907254	-0.247476	0.20611	0.733815
Glycine/Methionine	ADOS-2 SA CSS	ADOS-2 Module-1 or Module-2 Social Affect Calibrated Severity Score	7.33333	6.8318	1.07341	0.290599	0.206769	0.734733
Glycine/Asparagine	MSEL VR	MSEL Visual Reception T-score	34.8857	31.181	1.11881	0.245096	0.207512	0.735489
Homoserine/Carnitine	BMI	Participants body mass index	17.1574	16.6677	1.02938	0.239153	0.207786	0.735489
Arg/4hyp	AgeMonths	Participants age in months	36.7576	34.9226	1.05254	0.232731	0.210347	0.736514
Arginine/4-hydroxyproline	AgeMonths	Participants age in months	36.7576	34.9226	1.05254	0.232731	0.210347	0.736514
Lactate/Phenylalanine	ADOS-2 Comparison Score	ADOS-2 Module-1 or Module-2 Comparison Severity Score	7.70588	7.08511	1.08762	0.3324	0.211178	0.736514
Leucine	BMI	Participants body mass index	17.8498	16.6232	1.07379	0.320931	0.209713	0.736514
Taurine/4-hydroxyproline	MSEL DQ	MSEL Developmental Quotient (DQ)	59.4865	62.9892	0.944393	-0.209677	0.210669	0.736514
↑Ethanolamine	MSEL FM	MSEL Fine Motor T-score	30.1818	28.0951	1.07427	0.179391	0.210998	0.736514
↓C5DC	MSEL EL	MSEL Expressive Language T-score	26.6508	28.264	0.942923	-0.161523	0.211295	0.736514
↓aKG1	AgeMonths	Participants age in months	36.3276	34.8998	1.04091	0.180002	0.209413	0.736514
Octanoylcarnitine/Citrate	MSEL RL	MSEL Receptive Language T-score	25	27.0751	0.923357	-0.212606	0.212327	0.738704
Lactate/Taurine	BMI	Participants body mass index	17.0169	16.6716	1.02071	0.185509	0.213179	0.73969
Serine/Leucine	MSEL EL	MSEL Expressive Language T-score	26.1935	28.2073	0.92861	-0.210441	0.213581	0.73969
↓aKG2	MSEL FM	MSEL Fine Motor T-score	30.4828	28.0934	1.08505	0.195262	0.213823	0.73969
Hypoxanthine/Carnitine	MSEL DQ	MSEL Developmental Quotient (DQ)	58.76	62.7968	0.935716	-0.246527	0.214333	0.740054
Alanine/Carnitine	ADOS-2 Comparison Score	ADOS-2 Module-1 or Module-2 Comparison Severity Score	7.56522	7.08359	1.06799	0.269885	0.215689	0.740544
Lactate/Arginine	MSEL EL	MSEL Expressive Language T-score	26.1951	28.2264	0.928037	-0.199439	0.214941	0.740544
Lactate/Sarcosine	MSEL RL	MSEL Receptive Language T-score	24.8	27.089	0.915501	-0.225245	0.215495	0.740544
Lactate/Histidine	MSEL DQ	MSEL Developmental Quotient (DQ)	59.7812	62.9009	0.950404	-0.200616	0.218307	0.745996
Taurine/Citrate	MSEL DQ	MSEL Developmental Quotient (DQ)	67.2647	62.3348	1.07909	0.248615	0.217928	0.745996
Taurine/Phenylalanine	BMI	Participants body mass index	16.3724	16.7289	0.978694	-0.188592	0.218499	0.745996
Methionine/Leucine	MSEL VR	MSEL Visual Reception T-score	28.5161	31.6346	0.901422	-0.230109	0.220751	0.748085
Pyruvate/Homoserine	MSEL RL	MSEL Receptive Language T-score	24.8333	27.141	0.914975	-0.208994	0.22042	0.748085
Taurine/Ethanolamine	MSEL DQ	MSEL Developmental Quotient (DQ)	68.12	62.4304	1.09114	0.287517	0.219948	0.748085
↓C5DC	MSEL VR	MSEL Visual Reception T-score	29.6032	31.6542	0.935205	-0.158026	0.220378	0.748085
↓Leucine	ADOS-2 SA CSS	ADOS-2 Module-1 or Module-2 Social Affect Calibrated Severity Score	7.21053	6.81935	1.05736	0.218938	0.221155	0.748085
Decanoylcarnitine/Valine	ADOS-2 RRB CSS	ADOS-2 Module-1 or Module-2 Restrictive Repetitive Calibrated Severity Score	7.43478	7.82759	0.949818	-0.244361	0.224689	0.751754
Ethanolamine/Malate	BMI	Participants body mass index	16.4118	16.7205	0.981534	-0.173917	0.222895	0.751754
Glycine/Hexanoylcarnitine	MSEL FM	MSEL Fine Motor T-score	26.0667	28.4295	0.916888	-0.228066	0.224468	0.751754
Lactate/Isoleucine	MSEL DQ	MSEL Developmental Quotient (DQ)	59.5714	62.8571	0.947727	-0.211295	0.224705	0.751754
Pyruvate/a-Ketoglutarate	ADOS-2 SA CSS	ADOS-2 Module-1 or Module-2 Social Affect Calibrated Severity Score	7.30435	6.84211	1.06756	0.267541	0.224054	0.751754
Xanthine/Palmitoylcarnitine	ADOS-2 Comparison Score	ADOS-2 Module-1 or Module-2 Comparison Severity Score	7.56522	7.09241	1.06666	0.266573	0.224546	0.751754
Alanine/a-Ketoglutarate	MSEL RL	MSEL Receptive Language T-score	24.3	27.1456	0.895172	-0.241037	0.226004	0.751993
Eta/Kyn	AgeMonths	Participants age in months	36.5	34.9503	1.04434	0.205529	0.226009	0.751993
Ethanolamine/Kynurenine	AgeMonths	Participants age in months	36.5	34.9503	1.04434	0.205529	0.226009	0.751993
Homoserine/Carnitine	ADOS-2 Comparison Score	ADOS-2 Module-1 or Module-2 Comparison Severity Score	7.54167	7.08385	1.06463	0.257137	0.226802	0.753261
Lactate/Citrate	MSEL FM	MSEL Fine Motor T-score	26.6452	28.4871	0.935341	-0.194277	0.228218	0.756427
Ornithine/Lysine	ADOS-2 SA CSS	ADOS-2 Module-1 or Module-2 Social Affect Calibrated Severity Score	7.22581	6.81962	1.05956	0.232212	0.228582	0.756427
Xanthine/4-hydroxyproline	MSEL EL	MSEL Expressive Language T-score	25.92	28.224	0.918368	-0.234414	0.229433	0.757873
Octanoylcarnitine/Glutamic Acid	AgeMonths	Participants age in months	36.6562	35.0109	1.047	0.217122	0.230922	0.75972
Pyruvate/Kynurenine	ADOS-2 Comparison Score	ADOS-2 Module-1 or Module-2 Comparison Severity Score	7.51613	7.07619	1.06217	0.235816	0.231232	0.75972
Pyruvate/Phenylalanine	ADOS-2 Comparison Score	ADOS-2 Module-1 or Module-2 Comparison Severity Score	7.6875	7.08788	1.0846	0.324515	0.231237	0.75972
Glutamine	ADOS-2 RRB CSS	ADOS-2 Module-1 or Module-2 Restrictive Repetitive Calibrated Severity Score	8.13636	7.78221	1.04551	0.229723	0.233504	0.761756
Glycine/Arginine	ADOS-2 Comparison Score	ADOS-2 Module-1 or Module-2 Comparison Severity Score	7.59091	7.08923	1.07077	0.273667	0.233845	0.761756
Homoserine/Carnitine	MSEL VR	MSEL Visual Reception T-score	28.5667	31.621	0.903409	-0.22588	0.234775	0.761756
Lactate/Homoserine	MSEL FM	MSEL Fine Motor T-score	26.7857	28.467	0.940941	-0.184991	0.234793	0.761756
Lactate/Palmitoylcarnitine	MSEL FM	MSEL Fine Motor T-score	26.8269	28.4579	0.942689	-0.164078	0.233337	0.761756
Serine/Leucine	MSEL FM	MSEL Fine Motor T-score	26.3226	28.5491	0.922009	-0.215813	0.235603	0.761756
Taurine/Palmitoylcarnitine	ADOS-2 SA CSS	ADOS-2 Module-1 or Module-2 Social Affect Calibrated Severity Score	7.33333	6.83851	1.07236	0.279827	0.233496	0.761756
Xanthine/Histidine	AgeMonths	Participants age in months	33.125	35.2686	0.93922	-0.265657	0.234349	0.761756
↓aKG1	BMI	Participants body mass index	17.0111	16.6578	1.02121	0.171144	0.235332	0.761756
Lactate/Taurine	MSEL VR	MSEL Visual Reception T-score	29.6154	31.5917	0.937442	-0.165787	0.236645	0.76243
Malate/Proline	ADOS-2 SA CSS	ADOS-2 Module-1 or Module-2 Social Affect Calibrated Severity Score	6.41176	6.89666	0.929692	-0.291041	0.236397	0.76243
Lactate/Hexanoylcarnitine	ADOS-2 RRB CSS	ADOS-2 Module-1 or Module-2 Restrictive Repetitive Calibrated Severity Score	8.42105	7.75617	1.08572	0.325002	0.237529	0.763935
Alanine/Valine	BMI	Participants body mass index	17.3591	16.6648	1.04166	0.280532	0.238289	0.765032
Arginine/Carnitine	ADOS-2 Comparison Score	ADOS-2 Module-1 or Module-2 Comparison Severity Score	7.54545	7.09598	1.06334	0.256884	0.239317	0.765148
Lactate/Serine	MSEL FM	MSEL Fine Motor T-score	26.5926	28.4745	0.93391	-0.200025	0.239579	0.765148
Octanoylcarnitine/Valine	MSEL DQ	MSEL Developmental Quotient (DQ)	65.5455	62.3917	1.05055	0.197765	0.238816	0.765148
Lactate/Citrulline	MSEL VR	MSEL Visual Reception T-score	29.0857	31.6147	0.920005	-0.19581	0.241647	0.769223
Lactate/Tyrosine	MSEL FM	MSEL Fine Motor T-score	26.7647	28.4903	0.939433	-0.181305	0.242432	0.769223
Leu/Val	MSEL RL	MSEL Receptive Language T-score	24.9375	27.1545	0.918356	-0.204858	0.242957	0.769223
Leucine/Valine	MSEL RL	MSEL Receptive Language T-score	24.9375	27.1545	0.918356	-0.204858	0.242957	0.769223
gamma-Aminobutyric Acid/Hexanoylcarnitine	BMI	Participants body mass index	17.235	16.6776	1.03342	0.257091	0.24266	0.769223
Arginine/Leucine	MSEL DQ	MSEL Developmental Quotient (DQ)	59.7353	62.9483	0.948958	-0.196785	0.245331	0.770138
Glycine/Hexanoylcarnitine	ADOS-2 RRB CSS	ADOS-2 Module-1 or Module-2 Restrictive Repetitive Calibrated Severity Score	8.15	7.7709	1.04878	0.241376	0.243972	0.770138
Glycine/Hexanoylcarnitine	ADOS-2 SA CSS	ADOS-2 Module-1 or Module-2 Social Affect Calibrated Severity Score	7.3	6.84211	1.06692	0.268885	0.244979	0.770138
Lactate/Homoserine	MSEL DQ	MSEL Developmental Quotient (DQ)	59.7857	62.8443	0.95133	-0.198636	0.245454	0.770138
Lactate/Isoleucine	ADOS-2 Comparison Score	ADOS-2 Module-1 or Module-2 Comparison Severity Score	7.78571	7.08735	1.09854	0.355527	0.244738	0.770138
Methionine/Leucine	ADOS-2 SA CSS	ADOS-2 Module-1 or Module-2 Social Affect Calibrated Severity Score	7.25	6.83841	1.06019	0.253577	0.245771	0.770138
Lactate/Citrulline	MSEL DQ	MSEL Developmental Quotient (DQ)	59.8286	62.8874	0.95136	-0.190099	0.24662	0.771456
Xanthine/Carnitine	MSEL EL	MSEL Expressive Language T-score	25.9259	28.2313	0.91834	-0.226725	0.247035	0.771456
Alanine/Tyrosine	ADOS-2 RRB CSS	ADOS-2 Module-1 or Module-2 Restrictive Repetitive Calibrated Severity Score	8.23077	7.78806	1.05684	0.282298	0.275998	0.773872
Alanine/Valine	MSEL VR	MSEL Visual Reception T-score	28.6154	31.5847	0.905987	-0.224898	0.25743	0.773872
Alanine/a-Ketoglutarate	MSEL EL	MSEL Expressive Language T-score	26.0333	28.1863	0.923617	-0.210591	0.261238	0.773872
Alanine/a-Ketoglutarate	MSEL VR	MSEL Visual Reception T-score	28.6667	31.6146	0.906755	-0.213159	0.272111	0.773872
Arg/4hyp	ADOS-2 RRB CSS	ADOS-2 Module-1 or Module-2 Restrictive Repetitive Calibrated Severity Score	8.16	7.79814	1.0464	0.221915	0.272663	0.773872
Arg/4hyp	MSEL FM	MSEL Fine Motor T-score	26.4545	28.5677	0.926029	-0.200096	0.268481	0.773872
Arginine/4-hydroxyproline	ADOS-2 RRB CSS	ADOS-2 Module-1 or Module-2 Restrictive Repetitive Calibrated Severity Score	8.16	7.79814	1.0464	0.221915	0.272663	0.773872
Arginine/4-hydroxyproline	MSEL FM	MSEL Fine Motor T-score	26.4545	28.5677	0.926029	-0.200096	0.268481	0.773872
Arginine/Carnitine	ADOS-2 RRB CSS	ADOS-2 Module-1 or Module-2 Restrictive Repetitive Calibrated Severity Score	8.13636	7.79257	1.04412	0.221973	0.269186	0.773872
Arginine/Phenylalanine	ADOS-2 SA CSS	ADOS-2 Module-1 or Module-2 Social Affect Calibrated Severity Score	7.2381	6.84356	1.05765	0.241042	0.263203	0.773872
Arginine/Tyrosine	AgeMonths	Participants age in months	33.6	35.1533	0.955812	-0.195356	0.281672	0.773872
Arginine/Tyrosine	MSEL DQ	MSEL Developmental Quotient (DQ)	60	62.9352	0.953361	-0.180036	0.279584	0.773872
Citrulline/Glutarylcarnitine	ADOS-2 Comparison Score	ADOS-2 Module-1 or Module-2 Comparison Severity Score	7.45455	7.07742	1.05329	0.205561	0.272837	0.773872
Citrulline/Glutarylcarnitine	ADOS-2 SA CSS	ADOS-2 Module-1 or Module-2 Social Affect Calibrated Severity Score	7.18182	6.83548	1.05067	0.202644	0.265574	0.773872
Decanoylcarnitine/Isoleucine	ADOS-2 RRB CSS	ADOS-2 Module-1 or Module-2 Restrictive Repetitive Calibrated Severity Score	8.13043	7.76875	1.04656	0.225609	0.257758	0.773872
Ethanolamine/Malate	AgeMonths	Participants age in months	36.6364	34.9547	1.04811	0.208209	0.270904	0.773872
Ethanolamine/Malate	MSEL EL	MSEL Expressive Language T-score	30.4242	27.8879	1.09095	0.222896	0.258091	0.773872
Ethanolamine/Malate	MSEL VR	MSEL Visual Reception T-score	34.4545	31.222	1.10353	0.222994	0.248753	0.773872
Ethanolamine/Urate	MSEL EL	MSEL Expressive Language T-score	25.76	28.178	0.914189	-0.229184	0.278923	0.773872
Glycine/Arginine	ADOS-2 SA CSS	ADOS-2 Module-1 or Module-2 Social Affect Calibrated Severity Score	7.27273	6.84	1.06326	0.249973	0.265873	0.773872
Glycine/Arginine	MSEL EL	MSEL Expressive Language T-score	30.3143	27.9158	1.08592	0.209577	0.274409	0.773872
Glycine/Carnitine	BMI	Participants body mass index	17.0047	16.6604	1.02067	0.167688	0.250001	0.773872
Glycine/Hexanoylcarnitine	ADOS-2 Comparison Score	ADOS-2 Module-1 or Module-2 Comparison Severity Score	7.55	7.08669	1.06538	0.262721	0.251825	0.773872
Glycine/Malate	AgeMonths	Participants age in months	36.7931	34.9594	1.05245	0.229808	0.249107	0.773872
Glycine/Phenylalanine	BMI	Participants body mass index	17.1631	16.6673	1.02975	0.223668	0.259136	0.773872
Glycine/Valine	MSEL FM	MSEL Fine Motor T-score	26.7419	28.5225	0.937574	-0.181751	0.28333	0.773872
Hexanoylcarnitine/Leucine	MSEL EL	MSEL Expressive Language T-score	26.4571	28.1798	0.938868	-0.178133	0.271209	0.773872
Histidine/Leucine	BMI	Participants body mass index	17.7107	16.6141	1.066	0.292862	0.258963	0.773872
Homoserine/Carnitine	ADOS-2 RRB CSS	ADOS-2 Module-1 or Module-2 Restrictive Repetitive Calibrated Severity Score	8.125	7.77019	1.04566	0.218459	0.274319	0.773872
Homoserine/Citrate	BMI	Participants body mass index	17.2672	16.6603	1.03643	0.240248	0.281618	0.773872
Homoserine/Citrate	MSEL VR	MSEL Visual Reception T-score	34.3103	31.2585	1.09763	0.219284	0.269397	0.773872
Homoserine/Isoleucine	ADOS-2 SA CSS	ADOS-2 Module-1 or Module-2 Social Affect Calibrated Severity Score	7.31579	6.83587	1.07021	0.276449	0.254465	0.773872
Lactate	MSEL DQ	MSEL Developmental Quotient (DQ)	59.6923	62.8365	0.949962	-0.200065	0.27453	0.773872
Lactate	MSEL FM	MSEL Fine Motor T-score	26.6538	28.4671	0.936304	-0.194942	0.250073	0.773872
Lactate/4-hydroxyproline	AgeMonths	Participants age in months	33.4857	35.167	0.952191	-0.205011	0.271198	0.773872
Lactate/Alanine	MSEL EL	MSEL Expressive Language T-score	26.1818	28.1897	0.928774	-0.199095	0.258607	0.773872
Lactate/Glutarylcarnitine	BMI	Participants body mass index	17.0638	16.6836	1.02279	0.194348	0.282786	0.773872
Lactate/Glutarylcarnitine	MSEL RL	MSEL Receptive Language T-score	24.7586	27.1082	0.913325	-0.213906	0.25819	0.773872
Lactate/Hexanoylcarnitine	BMI	Participants body mass index	17.153	16.6743	1.02871	0.219163	0.261415	0.773872
Lactate/Leucine	MSEL RL	MSEL Receptive Language T-score	24.9	27.1071	0.91858	-0.203254	0.264804	0.773872
Lactate/Malate	AgeMonths	Participants age in months	33.6429	35.1978	0.955823	-0.189973	0.265493	0.773872
Lactate/Octanoylcarnitine	ADOS-2 SA CSS	ADOS-2 Module-1 or Module-2 Social Affect Calibrated Severity Score	7.3125	6.84709	1.06797	0.276034	0.279848	0.773872
Lactate/Ornithine	MSEL RL	MSEL Receptive Language T-score	25.1562	27.0989	0.928312	-0.184148	0.278739	0.773872
Lactate/Tyrosine	MSEL EL	MSEL Expressive Language T-score	26.2059	28.1922	0.929543	-0.193146	0.276391	0.773872
Lactate/Urate	MSEL RL	MSEL Receptive Language T-score	25.0606	27.1099	0.924407	-0.189621	0.272941	0.773872
Lactate/Valine	MSEL DQ	MSEL Developmental Quotient (DQ)	59.9667	62.8369	0.954322	-0.186084	0.260675	0.773872
Leu/Car	ADOS-2 Comparison Score	ADOS-2 Module-1 or Module-2 Comparison Severity Score	7.61905	7.08308	1.07567	0.272318	0.2722	0.773872
Leu/Val	ADOS-2 SA CSS	ADOS-2 Module-1 or Module-2 Social Affect Calibrated Severity Score	6.47826	6.89815	0.93913	-0.240801	0.277575	0.773872
Leucine/Carnitine	ADOS-2 Comparison Score	ADOS-2 Module-1 or Module-2 Comparison Severity Score	7.61905	7.08308	1.07567	0.272318	0.2722	0.773872
Leucine/Valine	ADOS-2 SA CSS	ADOS-2 Module-1 or Module-2 Social Affect Calibrated Severity Score	6.47826	6.89815	0.93913	-0.240801	0.277575	0.773872
Malate/Homoserine	ADOS-2 RRB CSS	ADOS-2 Module-1 or Module-2 Restrictive Repetitive Calibrated Severity Score	8.26667	7.77341	1.06345	0.296591	0.256727	0.773872
Malate/Proline	BMI	Participants body mass index	16.3639	16.7167	0.978896	-0.195885	0.258174	0.773872
Malate/Proline	MSEL VR	MSEL Visual Reception T-score	29.4483	31.5598	0.933094	-0.176589	0.276529	0.773872
Methionine/Carnitine	BMI	Participants body mass index	17.1395	16.6733	1.02796	0.22383	0.280185	0.773872
Octanoylcarnitine/Carnitine	MSEL DQ	MSEL Developmental Quotient (DQ)	66.3793	62.3766	1.06417	0.228192	0.252229	0.773872
Octanoylcarnitine/Carnitine	MSEL RL	MSEL Receptive Language T-score	29.6207	26.803	1.10512	0.23319	0.259893	0.773872
Octanoylcarnitine/Citrate	ADOS-2 RRB CSS	ADOS-2 Module-1 or Module-2 Restrictive Repetitive Calibrated Severity Score	7.38889	7.81538	0.945429	-0.255849	0.280534	0.773872
Octanoylcarnitine/Citrate	ADOS-2 SA CSS	ADOS-2 Module-1 or Module-2 Social Affect Calibrated Severity Score	6.38889	6.89538	0.926546	-0.282219	0.271397	0.773872
Octanoylcarnitine/Leucine	BMI	Participants body mass index	17.7993	16.6432	1.06947	0.311256	0.25413	0.773872
Pyruvate/Palmitoylcarnitine	BMI	Participants body mass index	17.382	16.6693	1.04276	0.276403	0.2641	0.773872
Pyruvate/Phenylalanine	ADOS-2 SA CSS	ADOS-2 Module-1 or Module-2 Social Affect Calibrated Severity Score	7.375	6.84848	1.07688	0.299192	0.264941	0.773872
Pyruvate/Phenylalanine	MSEL DQ	MSEL Developmental Quotient (DQ)	59.8125	62.8688	0.951386	-0.189572	0.269319	0.773872
Pyruvate/Proline	MSEL RL	MSEL Receptive Language T-score	24.9032	27.1116	0.918545	-0.20076	0.270306	0.773872
Serine/Isoleucine	ADOS-2 SA CSS	ADOS-2 Module-1 or Module-2 Social Affect Calibrated Severity Score	7.45455	6.84273	1.08941	0.350538	0.279489	0.773872
Serine/Urate	ADOS-2 Comparison Score	ADOS-2 Module-1 or Module-2 Comparison Severity Score	7.55	7.08896	1.06504	0.259828	0.261627	0.773872
Serine/Urate	MSEL RL	MSEL Receptive Language T-score	29.8621	26.7949	1.11447	0.23903	0.26639	0.773872
Taurine/4-hydroxyproline	MSEL VR	MSEL Visual Reception T-score	29.2432	31.6204	0.924822	-0.182891	0.26498	0.773872
Taurine/Citrate	MSEL RL	MSEL Receptive Language T-score	29.4118	26.7948	1.09767	0.212212	0.273032	0.773872
Taurine/Citrate	MSEL VR	MSEL Visual Reception T-score	34.3824	31.2203	1.10128	0.212565	0.273669	0.773872
Taurine/Malate	MSEL EL	MSEL Expressive Language T-score	30.5357	27.9083	1.09414	0.234696	0.265652	0.773872
Taurine/Phenylalanine	MSEL DQ	MSEL Developmental Quotient (DQ)	60.1026	62.937	0.954965	-0.172806	0.278738	0.773872
Taurine/a-Ketoglutarate	AgeMonths	Participants age in months	36.2083	34.9443	1.03617	0.165724	0.268665	0.773872
Xanthine/Carnitine	MSEL RL	MSEL Receptive Language T-score	24.9259	27.0499	0.92148	-0.202576	0.268991	0.773872
a-Ketoglutarate/Valine	BMI	Participants body mass index	16.3176	16.7308	0.975304	-0.196586	0.281776	0.773872
aKG/Val	BMI	Participants body mass index	16.3176	16.7308	0.975304	-0.196586	0.281776	0.773872
↑Arginine	ADOS-2 Comparison Score	ADOS-2 Module-1 or Module-2 Comparison Severity Score	7.41667	7.08682	1.04654	0.191761	0.257347	0.773872
↑Arginine	MSEL DQ	MSEL Developmental Quotient (DQ)	60.5	63.0113	0.960145	-0.152057	0.264047	0.773872
↑Arginine	MSEL FM	MSEL Fine Motor T-score	26.9821	28.6109	0.943073	-0.154896	0.270873	0.773872
↑Gly↓BCAA	ADOS-2 SA CSS	ADOS-2 Module-1 or Module-2 Social Affect Calibrated Severity Score	7.1	6.82215	1.04073	0.162486	0.283226	0.773872
↑LacPyr↓GlyAsp	BMI	Participants body mass index	16.9802	16.6579	1.01935	0.152531	0.282245	0.773872
↑TauXan↓C16	ADOS-2 RRB CSS	ADOS-2 Module-1 or Module-2 Restrictive Repetitive Calibrated Severity Score	7.36364	7.83871	0.939394	-0.235296	0.259	0.773872
↓Carnitine1	BMI	Participants body mass index	16.9538	16.6503	1.01823	0.144759	0.256893	0.773872
↓Citrate	MSEL EL	MSEL Expressive Language T-score	27.0833	28.2893	0.957371	-0.118939	0.281802	0.773872
↓aKG2	MSEL VR	MSEL Visual Reception T-score	33.5517	31.1572	1.07685	0.163403	0.27571	0.773872
Lactate	ADOS-2 Comparison Score	ADOS-2 Module-1 or Module-2 Comparison Severity Score	7.625	7.09091	1.07532	0.288558	0.285395	0.774984
Lactate/4-hydroxyproline	MSEL RL	MSEL Receptive Language T-score	25.0286	27.128	0.922611	-0.187362	0.28451	0.774984
Lactate/Urate	MSEL DQ	MSEL Developmental Quotient (DQ)	60.3333	62.8384	0.960135	-0.164668	0.285787	0.774984
Ornithine/Citrate	AgeMonths	Participants age in months	36.1373	34.9439	1.03415	0.156165	0.2847	0.774984
Xanthine/Histidine	MSEL DQ	MSEL Developmental Quotient (DQ)	59.375	62.7856	0.945679	-0.211259	0.285855	0.774984
Pyruvate/Homoserine	MSEL EL	MSEL Expressive Language T-score	26.3611	28.1887	0.935165	-0.180467	0.28749	0.778265
Lactate/Xanthine	ADOS-2 Comparison Score	ADOS-2 Module-1 or Module-2 Comparison Severity Score	7.55	7.10032	1.06333	0.251458	0.288481	0.779794
Pyruvate/Homocitrulline	MSEL DQ	MSEL Developmental Quotient (DQ)	60.2439	62.8904	0.95792	-0.163012	0.289228	0.780658
Alanine/Carnitine	MSEL RL	MSEL Receptive Language T-score	24.9429	27.1277	0.919461	-0.189706	0.292211	0.781894
Arginine/Phenylalanine	ADOS-2 Comparison Score	ADOS-2 Module-1 or Module-2 Comparison Severity Score	7.47619	7.09816	1.05326	0.224534	0.29117	0.781894
Glycine/Isoleucine	MSEL RL	MSEL Receptive Language T-score	25.4211	27.1432	0.936554	-0.163718	0.292249	0.781894
Malate/Homoserine	MSEL EL	MSEL Expressive Language T-score	26.0741	28.1702	0.92559	-0.206502	0.290974	0.781894
↑C10C8C6	MSEL DQ	MSEL Developmental Quotient (DQ)	61.0947	62.9773	0.970108	-0.114905	0.291624	0.781894
↓Carnitine2	AgeMonths	Participants age in months	34.2444	35.2482	0.971524	-0.125947	0.291678	0.781894
Lactate/Isoleucine	MSEL EL	MSEL Expressive Language T-score	26.0357	28.177	0.924007	-0.206567	0.293151	0.783094
Lactate/Leucine	BMI	Participants body mass index	17.1265	16.672	1.02726	0.213861	0.293553	0.783094
Pyruvate/Hexanoylcarnitine	MSEL EL	MSEL Expressive Language T-score	29.8372	27.8862	1.06996	0.177246	0.29433	0.784023
↑Taurine	MSEL VR	MSEL Visual Reception T-score	33.2615	31.1682	1.06716	0.14648	0.294764	0.784039
Citrulline/Glutarylcarnitine	MSEL VR	MSEL Visual Reception T-score	29.5417	31.5914	0.935117	-0.155255	0.295284	0.784282
Malate/Homoserine	MSEL VR	MSEL Visual Reception T-score	29.5185	31.5468	0.935705	-0.171566	0.296224	0.785636
↑Ornithine	MSEL EL	MSEL Expressive Language T-score	27.044	28.3137	0.955154	-0.121368	0.296679	0.785705
Alanine/Phenylalanine	AgeMonths	Participants age in months	33.5714	35.1507	0.95507	-0.204307	0.298356	0.787595
Arginine/Leucine	MSEL VR	MSEL Visual Reception T-score	29.1176	31.6142	0.92103	-0.184721	0.300453	0.787595
Ethanolamine/Urate	ADOS-2 RRB CSS	ADOS-2 Module-1 or Module-2 Restrictive Repetitive Calibrated Severity Score	8.16667	7.77439	1.05046	0.240505	0.298886	0.787595
Lactate/Glutamine	MSEL DQ	MSEL Developmental Quotient (DQ)	60.0882	62.8618	0.955879	-0.172059	0.301266	0.787595
Lactate/Glycine	MSEL DQ	MSEL Developmental Quotient (DQ)	60.1724	62.8269	0.957749	-0.172792	0.300914	0.787595
Lysine/a-Ketoglutarate	ADOS-2 Comparison Score	ADOS-2 Module-1 or Module-2 Comparison Severity Score	7.52174	7.07764	1.06275	0.236756	0.299379	0.787595
Tryptophan/a-Ketoglutarate	ADOS-2 RRB CSS	ADOS-2 Module-1 or Module-2 Restrictive Repetitive Calibrated Severity Score	7.5	7.82692	0.958231	-0.188702	0.301204	0.787595
↓Citrate	MSEL FM	MSEL Fine Motor T-score	27.2812	28.6334	0.952777	-0.122424	0.298301	0.787595
↓Glutamine	MSEL DQ	MSEL Developmental Quotient (DQ)	60.2439	62.9367	0.957214	-0.162878	0.300301	0.787595
Lactate/Leucine	MSEL DQ	MSEL Developmental Quotient (DQ)	60.2333	62.8287	0.958691	-0.169079	0.302718	0.790262
Arginine/Leucine	ADOS-2 RRB CSS	ADOS-2 Module-1 or Module-2 Restrictive Repetitive Calibrated Severity Score	8.09091	7.80615	1.03648	0.191764	0.303526	0.791243
Homoserine/Isoleucine	BMI	Participants body mass index	17.1855	16.6681	1.03104	0.219682	0.304165	0.79178
Octanoylcarnitine/Citrate	BMI	Participants body mass index	16.4158	16.7236	0.981596	-0.171355	0.305421	0.792796
Pyruvate/Glutamic Acid	BMI	Participants body mass index	16.4739	16.7217	0.98518	-0.136016	0.305133	0.792796
Alanine/Lysine	MSEL EL	MSEL Expressive Language T-score	26.5957	28.2084	0.94283	-0.156047	0.306809	0.793549
Alanine/a-Ketoglutarate	MSEL DQ	MSEL Developmental Quotient (DQ)	59.2333	62.8929	0.941812	-0.203497	0.306276	0.793549
Serine/Leucine	MSEL VR	MSEL Visual Reception T-score	29	31.6026	0.917647	-0.191632	0.307012	0.793549
Glutamine	AgeMonths	Participants age in months	36.4615	34.9852	1.0422	0.197222	0.315431	0.794106
Glycine/Asparagine	MSEL DQ	MSEL Developmental Quotient (DQ)	66.2	62.4526	1.06	0.196181	0.310364	0.794106
Glycine/Malate	MSEL VR	MSEL Visual Reception T-score	34.9655	31.2179	1.12005	0.227573	0.307753	0.794106
Hypoxanthine/Carnitine	ADOS-2 RRB CSS	ADOS-2 Module-1 or Module-2 Restrictive Repetitive Calibrated Severity Score	8.33333	7.80064	1.06829	0.278148	0.313199	0.794106
Lactate/Aspartic Acid	BMI	Participants body mass index	17.1274	16.6654	1.02772	0.199279	0.315462	0.794106
Lactate/Carnitine	MSEL EL	MSEL Expressive Language T-score	26.2727	28.1832	0.932213	-0.182979	0.316341	0.794106
Lactate/Ethanolamine	BMI	Participants body mass index	17.1493	16.6694	1.02879	0.212622	0.312806	0.794106
Lactate/Xanthine	ADOS-2 SA CSS	ADOS-2 Module-1 or Module-2 Social Affect Calibrated Severity Score	7.25	6.86408	1.05622	0.229309	0.314882	0.794106
Leu/Val	BMI	Participants body mass index	16.4362	16.7215	0.982936	-0.156359	0.316214	0.794106
Leucine/Valine	BMI	Participants body mass index	16.4362	16.7215	0.982936	-0.156359	0.316214	0.794106
Malate/Carnitine	ADOS-2 RRB CSS	ADOS-2 Module-1 or Module-2 Restrictive Repetitive Calibrated Severity Score	8.12121	7.76038	1.0465	0.197525	0.309304	0.794106
Malate/Carnitine	MSEL FM	MSEL Fine Motor T-score	26.94	28.5324	0.944188	-0.150683	0.311018	0.794106
Methionine/Leucine	ADOS-2 RRB CSS	ADOS-2 Module-1 or Module-2 Restrictive Repetitive Calibrated Severity Score	8.1	7.78659	1.04025	0.202907	0.314864	0.794106
Phenylalanine/Citrate	ADOS-2 Comparison Score	ADOS-2 Module-1 or Module-2 Comparison Severity Score	7.41176	7.08333	1.04637	0.183556	0.309125	0.794106
Pyruvate/Homocitrulline	MSEL VR	MSEL Visual Reception T-score	29.439	31.6162	0.931137	-0.163358	0.309381	0.794106
Pyruvate/Phenylalanine	MSEL VR	MSEL Visual Reception T-score	29.4375	31.5742	0.932328	-0.169608	0.313734	0.794106
Xanthine/Palmitoylcarnitine	MSEL VR	MSEL Visual Reception T-score	29.2571	31.459	0.930008	-0.169971	0.311363	0.794106
a-Ketoglutarate/Valine	MSEL VR	MSEL Visual Reception T-score	29.4865	31.5817	0.933657	-0.162987	0.312305	0.794106
aKG/Val	MSEL VR	MSEL Visual Reception T-score	29.4865	31.5817	0.933657	-0.162987	0.312305	0.794106
↑Gly↓BCAA	AgeMonths	Participants age in months	34.2593	35.2177	0.972785	-0.123069	0.312916	0.794106
↓Leucine	AgeMonths	Participants age in months	34.125	35.2	0.96946	-0.13716	0.311693	0.794106
Glycine/Malate	ADOS-2 Comparison Score	ADOS-2 Module-1 or Module-2 Comparison Severity Score	7.57143	7.08615	1.06848	0.246368	0.319423	0.799701
Pyruvate/Homoserine	ADOS-2 Comparison Score	ADOS-2 Module-1 or Module-2 Comparison Severity Score	7.54545	7.08642	1.06478	0.237389	0.319443	0.799701
Leu/Val	ADOS-2 Comparison Score	ADOS-2 Module-1 or Module-2 Comparison Severity Score	6.78261	7.14506	0.949272	-0.209057	0.321409	0.802427
Leucine/Valine	ADOS-2 Comparison Score	ADOS-2 Module-1 or Module-2 Comparison Severity Score	6.78261	7.14506	0.949272	-0.209057	0.321409	0.802427
Lactate/Aspartic Acid	MSEL FM	MSEL Fine Motor T-score	27.0256	28.4869	0.948704	-0.149429	0.323501	0.805004
Lactate/a-Ketoglutarate	AgeMonths	Participants age in months	33.6	35.1606	0.955615	-0.194338	0.323003	0.805004
Xanthine/Palmitoylcarnitine	AgeMonths	Participants age in months	33.9429	35.3232	0.960923	-0.177353	0.324551	0.805004
a-Ketoglutarate/Valine	MSEL FM	MSEL Fine Motor T-score	26.9459	28.488	0.945869	-0.155599	0.324641	0.805004
aKG/Val	MSEL FM	MSEL Fine Motor T-score	26.9459	28.488	0.945869	-0.155599	0.324641	0.805004
Pyruvate/4-hydroxyproline	AgeMonths	Participants age in months	36.4167	34.9413	1.04222	0.180191	0.325448	0.805913
Glycine/Phenylalanine	MSEL VR	MSEL Visual Reception T-score	29.4118	31.5892	0.931069	-0.167435	0.326947	0.806352
Pyruvate/4-hydroxyproline	MSEL EL	MSEL Expressive Language T-score	26.4167	28.187	0.937195	-0.170559	0.326685	0.806352
Pyruvate/Aspartic Acid	MSEL RL	MSEL Receptive Language T-score	29.8621	26.7949	1.11447	0.220575	0.326091	0.806352
Alanine/Valine	MSEL RL	MSEL Receptive Language T-score	25.3077	27.1059	0.933659	-0.174277	0.335376	0.806489
Arginine/Citrate	MSEL EL	MSEL Expressive Language T-score	26.4516	28.1656	0.939146	-0.172579	0.33127	0.806489
Arginine/Tyrosine	MSEL EL	MSEL Expressive Language T-score	26.5429	28.2009	0.941207	-0.164674	0.332232	0.806489
Decanoylcarnitine/Isoleucine	MSEL VR	MSEL Visual Reception T-score	33.7188	31.2288	1.07973	0.181213	0.33257	0.806489
Decanoylcarnitine/Leucine	BMI	Participants body mass index	17.6033	16.6524	1.0571	0.258439	0.331478	0.806489
Eta/Kyn	ADOS-2 Comparison Score	ADOS-2 Module-1 or Module-2 Comparison Severity Score	7.46154	7.08385	1.05332	0.205028	0.331452	0.806489
Ethanolamine/Kynurenine	ADOS-2 Comparison Score	ADOS-2 Module-1 or Module-2 Comparison Severity Score	7.46154	7.08385	1.05332	0.205028	0.331452	0.806489
Ethanolamine/a-Ketoglutarate	MSEL FM	MSEL Fine Motor T-score	30.2821	28.2096	1.07347	0.176762	0.332767	0.806489
Glycine/Malate	MSEL DQ	MSEL Developmental Quotient (DQ)	67.3448	62.3825	1.07955	0.223211	0.331926	0.806489
Glycine/Valine	MSEL EL	MSEL Expressive Language T-score	26.6452	28.1606	0.946186	-0.160555	0.329697	0.806489
Lactate/Glutamic Acid	BMI	Participants body mass index	16.4818	16.7192	0.9858	-0.131019	0.334063	0.806489
Lactate/Octanoylcarnitine	MSEL RL	MSEL Receptive Language T-score	25.3939	27.083	0.937635	-0.16151	0.33204	0.806489
Lactate/Sarcosine	BMI	Participants body mass index	16.9872	16.6829	1.01824	0.167423	0.331517	0.806489
Malate/Carnitine	ADOS-2 Comparison Score	ADOS-2 Module-1 or Module-2 Comparison Severity Score	7.39394	7.08626	1.04342	0.17396	0.335255	0.806489
Ornithine/a-Ketoglutarate	BMI	Participants body mass index	17.0189	16.6739	1.02069	0.170546	0.329453	0.806489
Pyruvate/Glutamic Acid	ADOS-2 Comparison Score	ADOS-2 Module-1 or Module-2 Comparison Severity Score	6.79412	7.15064	0.950141	-0.185877	0.334026	0.806489
Pyruvate/Hexanoylcarnitine	ADOS-2 Comparison Score	ADOS-2 Module-1 or Module-2 Comparison Severity Score	7.42857	7.08571	1.04839	0.190719	0.335128	0.806489
Taurine/Ethanolamine	MSEL EL	MSEL Expressive Language T-score	30.16	27.9726	1.0782	0.205239	0.334415	0.806489
↓Carnitine1	MSEL EL	MSEL Expressive Language T-score	27.0256	28.2482	0.95672	-0.118665	0.33127	0.806489
Glycine/Isoleucine	BMI	Participants body mass index	17.1458	16.6663	1.02877	0.197052	0.336166	0.807328
Arginine/Leucine	ADOS-2 Comparison Score	ADOS-2 Module-1 or Module-2 Comparison Severity Score	7.45455	7.09846	1.05016	0.205201	0.341004	0.808338
Decanoylcarnitine/Valine	MSEL RL	MSEL Receptive Language T-score	25.6364	27.0656	0.947192	-0.144834	0.33748	0.808338
Ethanolamine/Carnitine	MSEL RL	MSEL Receptive Language T-score	25.1111	27.0809	0.927264	-0.181853	0.340401	0.808338
Hypoxanthine/Carnitine	ADOS-2 SA CSS	ADOS-2 Module-1 or Module-2 Social Affect Calibrated Severity Score	7.22222	6.86817	1.05155	0.218472	0.339993	0.808338
Lactate/Carnitine	MSEL RL	MSEL Receptive Language T-score	25.1818	27.1013	0.929174	-0.171759	0.338393	0.808338
Lys/Gln	MSEL RL	MSEL Receptive Language T-score	24.96	27.0994	0.921055	-0.193242	0.340649	0.808338
Lys/Phe	MSEL VR	MSEL Visual Reception T-score	33.9259	31.2739	1.0848	0.193558	0.338393	0.808338
Lysine/Glutamine	MSEL RL	MSEL Receptive Language T-score	24.96	27.0994	0.921055	-0.193242	0.340649	0.808338
Lysine/Phenylalanine	MSEL VR	MSEL Visual Reception T-score	33.9259	31.2739	1.0848	0.193558	0.338393	0.808338
Pyruvate/Sarcosine	MSEL VR	MSEL Visual Reception T-score	33.8235	31.2613	1.08196	0.17902	0.340855	0.808338
Glutamine	MSEL EL	MSEL Expressive Language T-score	26.4615	28.1712	0.93931	-0.17689	0.341926	0.809059
Octanoylcarnitine/Valine	ADOS-2 RRB CSS	ADOS-2 Module-1 or Module-2 Restrictive Repetitive Calibrated Severity Score	7.52174	7.82132	0.961697	-0.187762	0.342537	0.809059
Pyruvate/Homoserine	MSEL DQ	MSEL Developmental Quotient (DQ)	60.3056	62.8568	0.959411	-0.15614	0.343026	0.809059
↓Hydroxyproline	ADOS-2 RRB CSS	ADOS-2 Module-1 or Module-2 Restrictive Repetitive Calibrated Severity Score	8.04255	7.76744	1.03542	0.153968	0.343077	0.809059
Alanine/Carnitine	MSEL VR	MSEL Visual Reception T-score	29.3143	31.5974	0.927744	-0.167607	0.343872	0.809892
Histidine/Leucine	ADOS-2 SA CSS	ADOS-2 Module-1 or Module-2 Social Affect Calibrated Severity Score	7.3	6.83792	1.06758	0.240588	0.347087	0.815364
↑Taurine	MSEL DQ	MSEL Developmental Quotient (DQ)	65.0462	62.3664	1.04297	0.138297	0.346925	0.815364
Alanine/Kynurenine	MSEL EL	MSEL Expressive Language T-score	26.5714	28.172	0.943187	-0.166777	0.347695	0.815747
Octanoylcarnitine/Valine	MSEL FM	MSEL Fine Motor T-score	29.6364	28.1882	1.05138	0.15073	0.350174	0.820511
Decanoylcarnitine/Leucine	MSEL FM	MSEL Fine Motor T-score	29.9231	28.1935	1.06134	0.175325	0.352425	0.822444
Ethanolamine/Carnitine	MSEL EL	MSEL Expressive Language T-score	26.1111	28.1681	0.926975	-0.191747	0.352716	0.822444
Histidine/Leucine	MSEL FM	MSEL Fine Motor T-score	26.9091	28.5355	0.943005	-0.159009	0.360437	0.822444
Lactate	MSEL RL	MSEL Receptive Language T-score	25.0385	27.0807	0.924588	-0.183762	0.358437	0.822444
Lactate/4-hydroxyproline	ADOS-2 SA CSS	ADOS-2 Module-1 or Module-2 Social Affect Calibrated Severity Score	6.54545	6.90093	0.948489	-0.206027	0.35554	0.822444
Lactate/Carnitine	MSEL DQ	MSEL Developmental Quotient (DQ)	60.1212	62.8534	0.95653	-0.162559	0.359634	0.822444
Lactate/Lysine	ADOS-2 SA CSS	ADOS-2 Module-1 or Module-2 Social Affect Calibrated Severity Score	7.28571	6.84894	1.06377	0.255148	0.358305	0.822444
Lactate/Urate	MSEL FM	MSEL Fine Motor T-score	27.1515	28.4591	0.954056	-0.13952	0.360153	0.822444
Leucine/Glutarylcarnitine	ADOS-2 Comparison Score	ADOS-2 Module-1 or Module-2 Comparison Severity Score	6.72222	7.13538	0.942097	-0.227784	0.357489	0.822444
Ornithine/Lysine	MSEL EL	MSEL Expressive Language T-score	26.4615	28.1917	0.938628	-0.159803	0.35838	0.822444
Pyruvate/Carnitine	MSEL EL	MSEL Expressive Language T-score	26.4706	28.1728	0.93958	-0.164174	0.357749	0.822444
Pyruvate/Kynurenine	ADOS-2 RRB CSS	ADOS-2 Module-1 or Module-2 Restrictive Repetitive Calibrated Severity Score	8.12903	7.7619	1.0473	0.191826	0.354056	0.822444
Serine/Citrate	MSEL VR	MSEL Visual Reception T-score	33.7179	31.2424	1.07924	0.167787	0.352251	0.822444
Taurine/Palmitoylcarnitine	MSEL FM	MSEL Fine Motor T-score	30.1935	28.1565	1.07235	0.181539	0.359601	0.822444
Taurine/a-Ketoglutarate	BMI	Participants body mass index	16.4906	16.7217	0.98618	-0.123617	0.359193	0.822444
Threonine/Valine	MSEL FM	MSEL Fine Motor T-score	26.5	28.5169	0.929272	-0.188869	0.356039	0.822444
Threonine/Valine	MSEL RL	MSEL Receptive Language T-score	25.0769	27.1186	0.924712	-0.184294	0.353895	0.822444
Tryptophan/a-Ketoglutarate	MSEL EL	MSEL Expressive Language T-score	26.7111	28.1903	0.94753	-0.143256	0.357903	0.822444
↑Arginine	ADOS-2 RRB CSS	ADOS-2 Module-1 or Module-2 Restrictive Repetitive Calibrated Severity Score	8.02778	7.80064	1.02912	0.14635	0.357002	0.822444
↑Arginine	ADOS-2 SA CSS	ADOS-2 Module-1 or Module-2 Social Affect Calibrated Severity Score	7.11111	6.83923	1.03975	0.159819	0.357946	0.822444
↓aKG1	ADOS-2 SA CSS	ADOS-2 Module-1 or Module-2 Social Affect Calibrated Severity Score	7.12195	6.83934	1.04132	0.158222	0.358304	0.822444
Glycine/Phenylalanine	MSEL RL	MSEL Receptive Language T-score	25.5588	27.1183	0.942494	-0.148472	0.363049	0.824293
Lactate/Isoleucine	BMI	Participants body mass index	17.0833	16.6766	1.02439	0.191607	0.362906	0.824293
Octanoylcarnitine/Valine	BMI	Participants body mass index	17.3646	16.6574	1.04246	0.211069	0.362912	0.824293
↑Ornithine	ADOS-2 SA CSS	ADOS-2 Module-1 or Module-2 Social Affect Calibrated Severity Score	7.03077	6.82332	1.0304	0.122435	0.362279	0.824293
Octanoylcarnitine/Isoleucine	MSEL DQ	MSEL Developmental Quotient (DQ)	65.12	62.4785	1.04228	0.168959	0.363964	0.825347
Glycine/Phenylalanine	ADOS-2 RRB CSS	ADOS-2 Module-1 or Module-2 Restrictive Repetitive Calibrated Severity Score	8.04167	7.78704	1.0327	0.165599	0.364856	0.826344
Glycine/Malate	MSEL FM	MSEL Fine Motor T-score	30.8966	28.2158	1.09501	0.203457	0.366215	0.828398
Lactate/Glutarylcarnitine	MSEL DQ	MSEL Developmental Quotient (DQ)	60.2069	62.7641	0.959257	-0.160529	0.366759	0.828603
Lys/Gln	ADOS-2 RRB CSS	ADOS-2 Module-1 or Module-2 Restrictive Repetitive Calibrated Severity Score	7.4375	7.81571	0.951609	-0.226737	0.368162	0.828704
Lysine/Glutamine	ADOS-2 RRB CSS	ADOS-2 Module-1 or Module-2 Restrictive Repetitive Calibrated Severity Score	7.4375	7.81571	0.951609	-0.226737	0.368162	0.828704
↑Malate	MSEL FM	MSEL Fine Motor T-score	27.12	28.5123	0.951168	-0.132798	0.367336	0.828704
Glycine/a-Ketoglutarate	BMI	Participants body mass index	17.0392	16.6715	1.02206	0.16766	0.37015	0.832155
Alanine/Kynurenine	BMI	Participants body mass index	17.2252	16.6706	1.03327	0.215734	0.371317	0.833106
Pyruvate/a-Ketoglutarate	MSEL EL	MSEL Expressive Language T-score	26.6585	28.182	0.945941	-0.146471	0.371483	0.833106
Pyruvate/a-Ketoglutarate	ADOS-2 Comparison Score	ADOS-2 Module-1 or Module-2 Comparison Severity Score	7.47826	7.08978	1.05479	0.204386	0.373164	0.835851
Decanoylcarnitine/Isoleucine	BMI	Participants body mass index	17.3628	16.6572	1.04236	0.209006	0.375406	0.836084
Glycine/Citrate	AgeMonths	Participants age in months	35.9	34.9732	1.0265	0.125395	0.37511	0.836084
Lactate/Phenylalanine	ADOS-2 SA CSS	ADOS-2 Module-1 or Module-2 Social Affect Calibrated Severity Score	7.23529	6.8541	1.05561	0.22289	0.374173	0.836084
Lactate/Xanthine	MSEL EL	MSEL Expressive Language T-score	26.5806	28.2059	0.942377	-0.160523	0.376009	0.836084
Pyruvate/Homoserine	AgeMonths	Participants age in months	33.75	35.1692	0.959647	-0.167188	0.374324	0.836084
↑Arginine	MSEL RL	MSEL Receptive Language T-score	25.8036	27.1719	0.94964	-0.123151	0.375578	0.836084
Octanoylcarnitine/Leucine	MSEL FM	MSEL Fine Motor T-score	29.84	28.2017	1.05809	0.167562	0.376999	0.837267
Decanoylcarnitine/Leucine	MSEL RL	MSEL Receptive Language T-score	25.5769	27.0473	0.945636	-0.149175	0.378124	0.838359
Pyruvate/Glutamic Acid	ADOS-2 SA CSS	ADOS-2 Module-1 or Module-2 Social Affect Calibrated Severity Score	6.58824	6.90385	0.954285	-0.170293	0.378407	0.838359
Alanine/Lysine	ADOS-2 Comparison Score	ADOS-2 Module-1 or Module-2 Comparison Severity Score	7.41379	7.07547	1.04782	0.178827	0.383738	0.839656
Arg/4hyp	MSEL EL	MSEL Expressive Language T-score	26.6061	28.1892	0.943837	-0.155053	0.381821	0.839656
Arginine/4-hydroxyproline	MSEL EL	MSEL Expressive Language T-score	26.6061	28.1892	0.943837	-0.155053	0.381821	0.839656
Homoserine/Citrate	MSEL RL	MSEL Receptive Language T-score	29.1379	26.8397	1.08563	0.183148	0.385139	0.839656
Hypoxanthine/4-hydroxyproline	BMI	Participants body mass index	16.4783	16.7047	0.986451	-0.128907	0.381535	0.839656
Lactate/Hexanoylcarnitine	AgeMonths	Participants age in months	33.9394	35.2031	0.964104	-0.161306	0.380378	0.839656
Leu/Val	AgeMonths	Participants age in months	36.1562	34.9785	1.03367	0.155688	0.384937	0.839656
Leucine/Valine	AgeMonths	Participants age in months	36.1562	34.9785	1.03367	0.155688	0.384937	0.839656
Methionine/Leucine	MSEL FM	MSEL Fine Motor T-score	26.9355	28.5085	0.944821	-0.154662	0.384649	0.839656
Ornithine/Carnitine	BMI	Participants body mass index	16.9681	16.6792	1.01732	0.14917	0.379728	0.839656
Pyruvate/Carnitine	BMI	Participants body mass index	16.9853	16.6773	1.01847	0.152962	0.385416	0.839656
Pyruvate/Glutamic Acid	MSEL FM	MSEL Fine Motor T-score	29.7347	28.2232	1.05355	0.136309	0.38515	0.839656
Taurine/Palmitoylcarnitine	MSEL VR	MSEL Visual Reception T-score	33.5484	31.2457	1.0737	0.166989	0.380173	0.839656
↓Urate	ADOS-2 RRB CSS	ADOS-2 Module-1 or Module-2 Restrictive Repetitive Calibrated Severity Score	8.03704	7.77429	1.0338	0.162828	0.382205	0.839656
↑C10C8C6	MSEL RL	MSEL Receptive Language T-score	26.1158	27.1742	0.961049	-0.0963545	0.386045	0.840026
Lactate/Valine	BMI	Participants body mass index	17.0625	16.6789	1.023	0.179647	0.386505	0.840029
Glycine/Malate	ADOS-2 SA CSS	ADOS-2 Module-1 or Module-2 Social Affect Calibrated Severity Score	7.2381	6.84923	1.05677	0.209991	0.387316	0.840709
Ornithine/a-Ketoglutarate	MSEL EL	MSEL Expressive Language T-score	26.4706	28.1728	0.93958	-0.158974	0.387737	0.840709
Decanoylcarnitine/Valine	MSEL FM	MSEL Fine Motor T-score	29.5758	28.1926	1.04906	0.141961	0.388572	0.841522
Glycine/Asparagine	BMI	Participants body mass index	16.4484	16.7211	0.983693	-0.140348	0.390568	0.843596
Lactate/Valine	MSEL VR	MSEL Visual Reception T-score	29.6	31.5429	0.938404	-0.151806	0.390912	0.843596
Taurine/4-hydroxyproline	ADOS-2 Comparison Score	ADOS-2 Module-1 or Module-2 Comparison Severity Score	7.41379	7.09434	1.04503	0.17287	0.390167	0.843596
Ornithine/a-Ketoglutarate	AgeMonths	Participants age in months	36.2647	34.9784	1.03677	0.159049	0.392313	0.844886
Threonine/Valine	MSEL DQ	MSEL Developmental Quotient (DQ)	59.6923	62.8729	0.949413	-0.179404	0.392433	0.844886
Glycine/Citrate	ADOS-2 RRB CSS	ADOS-2 Module-1 or Module-2 Restrictive Repetitive Calibrated Severity Score	7.97436	7.77199	1.02604	0.128778	0.394091	0.847458
Serine/Citrate	ADOS-2 RRB CSS	ADOS-2 Module-1 or Module-2 Restrictive Repetitive Calibrated Severity Score	8.03448	7.77287	1.03366	0.158241	0.394721	0.847817
Glycine/Leucine	MSEL VR	MSEL Visual Reception T-score	29.5	31.565	0.934578	-0.156338	0.396608	0.847888
Lactate/Histidine	MSEL FM	MSEL Fine Motor T-score	27.2812	28.4655	0.958396	-0.127915	0.396572	0.847888
Pyruvate/a-Ketoglutarate	MSEL RL	MSEL Receptive Language T-score	25.3171	27.1228	0.933424	-0.148366	0.39604	0.847888
↑Taurine	MSEL FM	MSEL Fine Motor T-score	29.7231	28.2143	1.05348	0.125097	0.396303	0.847888
Glycine/Phenylalanine	MSEL FM	MSEL Fine Motor T-score	27.0588	28.5097	0.94911	-0.143252	0.39732	0.84842
Ethanolamine/Malate	ADOS-2 RRB CSS	ADOS-2 Module-1 or Module-2 Restrictive Repetitive Calibrated Severity Score	8.12	7.76947	1.04512	0.188855	0.39849	0.849117
↓Glutamine	MSEL FM	MSEL Fine Motor T-score	27.0976	28.5284	0.949846	-0.136318	0.398716	0.849117
↓aKG1	ADOS-2 Comparison Score	ADOS-2 Module-1 or Module-2 Comparison Severity Score	7.36585	7.08197	1.04009	0.148471	0.399039	0.849117
↓aKG2	MSEL DQ	MSEL Developmental Quotient (DQ)	64.7759	62.3941	1.03817	0.126992	0.400357	0.850934
Glycine/Leucine	MSEL RL	MSEL Receptive Language T-score	25.5333	27.1066	0.94196	-0.147809	0.402106	0.851683
Lactate/4-hydroxyproline	ADOS-2 Comparison Score	ADOS-2 Module-1 or Module-2 Comparison Severity Score	6.81818	7.14551	0.954191	-0.184441	0.401813	0.851683
Lactate/Glycine	MSEL FM	MSEL Fine Motor T-score	27.1724	28.4466	0.955208	-0.135998	0.401233	0.851683
Glycine/Carnitine	AgeMonths	Participants age in months	35.9074	34.9639	1.02699	0.120925	0.404607	0.851701
Octanoylcarnitine/Carnitine	MSEL FM	MSEL Fine Motor T-score	30	28.1775	1.06468	0.166503	0.405427	0.851701
Ornithine/Lysine	ADOS-2 Comparison Score	ADOS-2 Module-1 or Module-2 Comparison Severity Score	7.35484	7.07911	1.03895	0.155903	0.402973	0.851701
Ornithine/a-Ketoglutarate	MSEL FM	MSEL Fine Motor T-score	30.3235	28.2289	1.0742	0.168384	0.404509	0.851701
Pyruvate/Aspartic Acid	BMI	Participants body mass index	17.1664	16.6718	1.02967	0.197655	0.405258	0.851701
Taurine/a-Ketoglutarate	MSEL VR	MSEL Visual Reception T-score	33.1042	31.2584	1.05905	0.131003	0.405838	0.851701
↓C5DC	AgeMonths	Participants age in months	34.3651	35.229	0.975478	-0.11204	0.40501	0.851701
↓Glutamine	MSEL RL	MSEL Receptive Language T-score	25.6585	27.1332	0.945651	-0.13306	0.405112	0.851701
Serine/Urate	MSEL VR	MSEL Visual Reception T-score	33.7931	31.2906	1.07998	0.171016	0.406869	0.852887
Citrulline/Carnitine	ADOS-2 Comparison Score	ADOS-2 Module-1 or Module-2 Comparison Severity Score	7.47368	7.0948	1.0534	0.201423	0.419226	0.854396
Eta/Kyn	MSEL RL	MSEL Receptive Language T-score	25.6111	27.121	0.944329	-0.136806	0.418358	0.854396
Ethanolamine/Kynurenine	MSEL RL	MSEL Receptive Language T-score	25.6111	27.121	0.944329	-0.136806	0.418358	0.854396
Glycine/Asparagine	MSEL EL	MSEL Expressive Language T-score	29.6571	27.9634	1.06057	0.153361	0.409465	0.854396
Glycine/Isoleucine	MSEL DQ	MSEL Developmental Quotient (DQ)	60.7632	62.8764	0.966391	-0.130214	0.412222	0.854396
Glycine/Malate	MSEL RL	MSEL Receptive Language T-score	29.3793	26.8248	1.09523	0.182129	0.418058	0.854396
Glycine/Phenylalanine	MSEL DQ	MSEL Developmental Quotient (DQ)	60.6176	62.8688	0.964193	-0.137383	0.417507	0.854396
Hexanoylcarnitine/Leucine	MSEL DQ	MSEL Developmental Quotient (DQ)	60.8857	62.7456	0.970358	-0.123177	0.408515	0.854396
Homoserine/Citrate	ADOS-2 Comparison Score	ADOS-2 Module-1 or Module-2 Comparison Severity Score	7.43478	7.09288	1.0482	0.183149	0.416832	0.854396
Lactate/Arginine	MSEL VR	MSEL Visual Reception T-score	29.9756	31.5714	0.949454	-0.124731	0.413025	0.854396
Lactate/Carnitine	ADOS-2 Comparison Score	ADOS-2 Module-1 or Module-2 Comparison Severity Score	7.45455	7.09259	1.05103	0.190552	0.415501	0.854396
Lactate/Ethanolamine	MSEL FM	MSEL Fine Motor T-score	27.2258	28.4485	0.957021	-0.129228	0.418266	0.854396
Leu/Car	ADOS-2 SA CSS	ADOS-2 Module-1 or Module-2 Social Affect Calibrated Severity Score	6.52381	6.89538	0.946112	-0.19967	0.412422	0.854396
Leucine/Carnitine	ADOS-2 SA CSS	ADOS-2 Module-1 or Module-2 Social Affect Calibrated Severity Score	6.52381	6.89538	0.946112	-0.19967	0.412422	0.854396
Malate/Homoserine	MSEL DQ	MSEL Developmental Quotient (DQ)	60.3333	62.8064	0.960624	-0.153076	0.410618	0.854396
Octanoylcarnitine/Leucine	MSEL VR	MSEL Visual Reception T-score	33.4	31.2833	1.06766	0.161809	0.417314	0.854396
Pyruvate/Carnitine	AgeMonths	Participants age in months	33.7941	35.1598	0.961157	-0.157927	0.419753	0.854396
Serine/Isoleucine	ADOS-2 Comparison Score	ADOS-2 Module-1 or Module-2 Comparison Severity Score	7.54545	7.09792	1.06305	0.255051	0.408629	0.854396
Serine/Isoleucine	MSEL VR	MSEL Visual Reception T-score	29.2692	31.5603	0.927408	-0.166562	0.419312	0.854396
Serine/Urate	ADOS-2 RRB CSS	ADOS-2 Module-1 or Module-2 Restrictive Repetitive Calibrated Severity Score	8.05	7.77914	1.03482	0.170827	0.415552	0.854396
Taurine/Citrate	MSEL FM	MSEL Fine Motor T-score	30.2647	28.2333	1.07195	0.164102	0.415108	0.854396
Taurine/Malate	ADOS-2 SA CSS	ADOS-2 Module-1 or Module-2 Social Affect Calibrated Severity Score	7.16667	6.85093	1.04609	0.178164	0.415771	0.854396
Tryptophan/a-Ketoglutarate	MSEL FM	MSEL Fine Motor T-score	29.9556	28.2146	1.0617	0.14381	0.40904	0.854396
Xanthine/Carnitine	ADOS-2 SA CSS	ADOS-2 Module-1 or Module-2 Social Affect Calibrated Severity Score	7.2	6.86731	1.04844	0.191517	0.415144	0.854396
↓Hydroxyproline	ADOS-2 SA CSS	ADOS-2 Module-1 or Module-2 Social Affect Calibrated Severity Score	6.65957	6.89369	0.966039	-0.130783	0.420195	0.854396
↓Leucine	ADOS-2 RRB CSS	ADOS-2 Module-1 or Module-2 Restrictive Repetitive Calibrated Severity Score	7.63158	7.82581	0.975181	-0.124362	0.410909	0.854396
↓aKG2	MSEL EL	MSEL Expressive Language T-score	27.0345	28.1913	0.958964	-0.112856	0.412658	0.854396
Pyruvate/Homoserine	ADOS-2 SA CSS	ADOS-2 Module-1 or Module-2 Social Affect Calibrated Severity Score	7.18182	6.85185	1.04816	0.184549	0.422681	0.858498
Serine/Urate	MSEL DQ	MSEL Developmental Quotient (DQ)	65.8621	62.4744	1.05423	0.172004	0.424436	0.861107
Serine/Citrate	MSEL RL	MSEL Receptive Language T-score	28.7436	26.8231	1.0716	0.148634	0.425492	0.862293
Decanoylcarnitine/Phenylalanine	MSEL EL	MSEL Expressive Language T-score	26.3846	28.1505	0.937269	-0.16553	0.426859	0.862649
Lactate/Citrulline	BMI	Participants body mass index	16.9786	16.6771	1.01808	0.144085	0.426522	0.862649
Lactate/Valine	MSEL EL	MSEL Expressive Language T-score	26.6333	28.1309	0.946764	-0.147196	0.427082	0.862649
Lactate/Threonine	MSEL DQ	MSEL Developmental Quotient (DQ)	60.7059	62.8164	0.966402	-0.130978	0.429592	0.864108
Octanoylcarnitine/Valine	MSEL EL	MSEL Expressive Language T-score	29.303	27.9497	1.04842	0.135974	0.42972	0.864108
Serine/Citrate	MSEL EL	MSEL Expressive Language T-score	29.5128	27.9323	1.05658	0.141349	0.429106	0.864108
Taurine/Ethanolamine	ADOS-2 RRB CSS	ADOS-2 Module-1 or Module-2 Restrictive Repetitive Calibrated Severity Score	7.29412	7.83082	0.931463	-0.238272	0.430165	0.864108
↑Ethanolamine	ADOS-2 RRB CSS	ADOS-2 Module-1 or Module-2 Restrictive Repetitive Calibrated Severity Score	7.97917	7.7651	1.02757	0.123369	0.429993	0.864108
Lactate	BMI	Participants body mass index	16.9991	16.6822	1.019	0.158101	0.431963	0.865076
Lactate/Kynurenine	ADOS-2 SA CSS	ADOS-2 Module-1 or Module-2 Social Affect Calibrated Severity Score	6.5	6.89329	0.942946	-0.208574	0.431819	0.865076
Lys/Gln	AgeMonths	Participants age in months	33.72	35.1099	0.960412	-0.170573	0.432661	0.865076
Lysine/Glutamine	AgeMonths	Participants age in months	33.72	35.1099	0.960412	-0.170573	0.432661	0.865076
↑Alanine	AgeMonths	Participants age in months	34.3538	35.1682	0.976844	-0.104657	0.433011	0.865076
Lactate/Xanthine	AgeMonths	Participants age in months	34.0323	35.2426	0.965658	-0.151642	0.433998	0.86516
Lysine/a-Ketoglutarate	ADOS-2 RRB CSS	ADOS-2 Module-1 or Module-2 Restrictive Repetitive Calibrated Severity Score	8.04348	7.77019	1.03517	0.164089	0.433637	0.86516
Arginine/Citrate	BMI	Participants body mass index	17.0734	16.6744	1.02393	0.162211	0.443418	0.865406
Arginine/Phenylalanine	AgeMonths	Participants age in months	36.1724	34.9744	1.03425	0.151139	0.443268	0.865406
Arginine/Tyrosine	MSEL VR	MSEL Visual Reception T-score	29.8286	31.5659	0.944963	-0.13177	0.43985	0.865406
Citrate	MSEL VR	MSEL Visual Reception T-score	33.9231	31.2994	1.08383	0.172903	0.438302	0.865406
Decanoylcarnitine/4-hydroxyproline	MSEL FM	MSEL Fine Motor T-score	27.1562	28.3821	0.956809	-0.126636	0.443978	0.865406
Glycine/a-Ketoglutarate	ADOS-2 Comparison Score	ADOS-2 Module-1 or Module-2 Comparison Severity Score	7.42308	7.09063	1.04689	0.171235	0.435644	0.865406
Lactate	ADOS-2 SA CSS	ADOS-2 Module-1 or Module-2 Social Affect Calibrated Severity Score	7.1875	6.85758	1.04811	0.194811	0.444802	0.865406
Lactate/Alanine	BMI	Participants body mass index	16.9377	16.6821	1.01533	0.131959	0.443977	0.865406
Lactate/Carnitine	MSEL FM	MSEL Fine Motor T-score	26.9697	28.472	0.947236	-0.140201	0.442668	0.865406
Lactate/Glutarylcarnitine	MSEL FM	MSEL Fine Motor T-score	27.0345	28.3636	0.953139	-0.135404	0.444511	0.865406
Lactate/Glycine	MSEL EL	MSEL Expressive Language T-score	26.6552	28.1432	0.947128	-0.145281	0.444012	0.865406
Lactate/Homocitrulline	BMI	Participants body mass index	16.8822	16.6783	1.01222	0.106887	0.438236	0.865406
Lactate/Isoleucine	MSEL VR	MSEL Visual Reception T-score	29.75	31.5373	0.943327	-0.140497	0.43872	0.865406
Lactate/Threonine	BMI	Participants body mass index	16.5118	16.7135	0.987934	-0.111783	0.440836	0.865406
Lactate/Tyrosine	BMI	Participants body mass index	17.0021	16.6768	1.01951	0.150242	0.43619	0.865406
Octanoylcarnitine/Leucine	ADOS-2 Comparison Score	ADOS-2 Module-1 or Module-2 Comparison Severity Score	6.77778	7.13231	0.950292	-0.19259	0.44151	0.865406
Octanoylcarnitine/Sarcosine	ADOS-2 RRB CSS	ADOS-2 Module-1 or Module-2 Restrictive Repetitive Calibrated Severity Score	8.04762	7.7764	1.03488	0.164488	0.444043	0.865406
Pyruvate/Carnitine	MSEL DQ	MSEL Developmental Quotient (DQ)	60.6176	62.8229	0.964897	-0.13225	0.444673	0.865406
Pyruvate/Kynurenine	BMI	Participants body mass index	16.9562	16.6714	1.01709	0.128735	0.440597	0.865406
Threonine/Valine	ADOS-2 SA CSS	ADOS-2 Module-1 or Module-2 Social Affect Calibrated Severity Score	6.55556	6.88754	0.9518	-0.190192	0.444303	0.865406
Threonine/Valine	AgeMonths	Participants age in months	34	35.1123	0.968322	-0.148907	0.444999	0.865406
Xanthine/Histidine	BMI	Participants body mass index	16.4828	16.6771	0.988348	-0.115375	0.440166	0.865406
↓aKG2	BMI	Participants body mass index	16.9301	16.6672	1.01578	0.117806	0.438797	0.865406
Serine/Citrate	MSEL DQ	MSEL Developmental Quotient (DQ)	65.2821	62.4498	1.04535	0.142961	0.446004	0.865799
↓aKG2	MSEL RL	MSEL Receptive Language T-score	28.1724	26.8155	1.0506	0.112709	0.446147	0.865799
Lactate/Asparagine	ADOS-2 SA CSS	ADOS-2 Module-1 or Module-2 Social Affect Calibrated Severity Score	6.53333	6.88822	0.94848	-0.204759	0.448209	0.866141
Lactate/Glutarylcarnitine	MSEL VR	MSEL Visual Reception T-score	29.8276	31.4892	0.947233	-0.132718	0.448216	0.866141
Lactate/Xanthine	MSEL RL	MSEL Receptive Language T-score	25.4839	27.0297	0.942808	-0.139144	0.447953	0.866141
Pyruvate/Aspartic Acid	ADOS-2 Comparison Score	ADOS-2 Module-1 or Module-2 Comparison Severity Score	7.47619	7.09231	1.05413	0.190229	0.447364	0.866141
Arginine/Tyrosine	BMI	Participants body mass index	16.955	16.6839	1.01625	0.133072	0.449346	0.866228
Lactate/Kynurenine	MSEL RL	MSEL Receptive Language T-score	25.6333	27.06	0.947279	-0.133849	0.449499	0.866228
Pyruvate/Kynurenine	AgeMonths	Participants age in months	34.2083	35.1581	0.972985	-0.118551	0.449681	0.866228
Alanine/Valine	MSEL EL	MSEL Expressive Language T-score	26.7308	28.1398	0.949926	-0.142851	0.453633	0.868469
Arginine/Tyrosine	ADOS-2 RRB CSS	ADOS-2 Module-1 or Module-2 Restrictive Repetitive Calibrated Severity Score	8.04762	7.80982	1.03045	0.153369	0.45263	0.868469
Decanoylcarnitine/Valine	MSEL VR	MSEL Visual Reception T-score	33.0606	31.2582	1.05766	0.134439	0.452662	0.868469
Lactate/Methionine	MSEL DQ	MSEL Developmental Quotient (DQ)	60.6	62.8051	0.964889	-0.134657	0.453692	0.868469
Lysine/a-Ketoglutarate	MSEL EL	MSEL Expressive Language T-score	26.8214	28.1026	0.954412	-0.133467	0.453362	0.868469
↓Citrate	MSEL VR	MSEL Visual Reception T-score	30.4583	31.6708	0.961716	-0.0871839	0.452175	0.868469
Octanoylcarnitine/4-hydroxyproline	MSEL FM	MSEL Fine Motor T-score	27.04	28.3699	0.953123	-0.13822	0.4542	0.868532
Citrulline/Glutarylcarnitine	AgeMonths	Participants age in months	34.3125	35.2054	0.974637	-0.114525	0.45546	0.868771
Glycine/Asparagine	MSEL FM	MSEL Fine Motor T-score	29.8571	28.3017	1.05496	0.138215	0.456519	0.868771
Lactate/Lysine	MSEL RL	MSEL Receptive Language T-score	25.32	27.0403	0.936379	-0.153185	0.456365	0.868771
Pyruvate/Sarcosine	MSEL DQ	MSEL Developmental Quotient (DQ)	64.9706	62.5032	1.03948	0.138067	0.456698	0.868771
Taurine/Palmitoylcarnitine	MSEL DQ	MSEL Developmental Quotient (DQ)	65.0323	62.45	1.04135	0.145004	0.45546	0.868771
Ethanolamine/Carnitine	AgeMonths	Participants age in months	36.1852	35.0021	1.0338	0.150267	0.457782	0.869441
Lactate/Sarcosine	ADOS-2 SA CSS	ADOS-2 Module-1 or Module-2 Social Affect Calibrated Severity Score	6.46154	6.88889	0.937965	-0.229637	0.458001	0.869441
Arg/4hyp	ADOS-2 SA CSS	ADOS-2 Module-1 or Module-2 Social Affect Calibrated Severity Score	7.2	6.84161	1.05238	0.175525	0.46046	0.870552
Arginine/4-hydroxyproline	ADOS-2 SA CSS	ADOS-2 Module-1 or Module-2 Social Affect Calibrated Severity Score	7.2	6.84161	1.05238	0.175525	0.46046	0.870552
Glutamic Acid/4-hydroxyproline	MSEL RL	MSEL Receptive Language T-score	25.5862	27.1066	0.94391	-0.13792	0.460489	0.870552
↑TauXan↓C16	ADOS-2 Comparison Score	ADOS-2 Module-1 or Module-2 Comparison Severity Score	7.36364	7.0871	1.03902	0.143814	0.459542	0.870552
Glycine/Isoleucine	MSEL FM	MSEL Fine Motor T-score	27.2895	28.5033	0.957416	-0.118957	0.462353	0.872005
Histidine/Leucine	ADOS-2 RRB CSS	ADOS-2 Module-1 or Module-2 Restrictive Repetitive Calibrated Severity Score	7.6	7.8104	0.973062	-0.139928	0.464159	0.872005
Lactate	MSEL VR	MSEL Visual Reception T-score	29.7692	31.5287	0.944196	-0.138065	0.463759	0.872005
Lactate/Leucine	MSEL VR	MSEL Visual Reception T-score	29.9	31.5353	0.948143	-0.128428	0.464593	0.872005
Lactate/Malate	MSEL VR	MSEL Visual Reception T-score	30.0476	31.5648	0.951933	-0.114841	0.464084	0.872005
Octanoylcarnitine/Leucine	MSEL DQ	MSEL Developmental Quotient (DQ)	64.52	62.5107	1.03214	0.131381	0.463202	0.872005
Pyruvate/Sarcosine	BMI	Participants body mass index	16.9483	16.6794	1.01612	0.130742	0.462011	0.872005
Decanoylcarnitine/4-hydroxyproline	BMI	Participants body mass index	16.5196	16.7241	0.987774	-0.111688	0.465299	0.872435
Decanoylcarnitine/Phenylalanine	MSEL VR	MSEL Visual Reception T-score	33.3846	31.2796	1.0673	0.151442	0.467238	0.875175
Decanoylcarnitine/4-hydroxyproline	ADOS-2 Comparison Score	ADOS-2 Module-1 or Module-2 Comparison Severity Score	6.82609	7.1442	0.955472	-0.166551	0.468485	0.875921
Lactate/Taurine	ADOS-2 Comparison Score	ADOS-2 Module-1 or Module-2 Comparison Severity Score	7.40909	7.09568	1.04417	0.167119	0.469496	0.875921
Pyruvate/Aspartic Acid	ADOS-2 RRB CSS	ADOS-2 Module-1 or Module-2 Restrictive Repetitive Calibrated Severity Score	8.14286	7.77231	1.04768	0.185103	0.469366	0.875921
Pyruvate/Homocitrulline	MSEL EL	MSEL Expressive Language T-score	27	28.1513	0.959103	-0.114272	0.469551	0.875921
Decanoylcarnitine/4-hydroxyproline	ADOS-2 SA CSS	ADOS-2 Module-1 or Module-2 Social Affect Calibrated Severity Score	6.6087	6.89342	0.958697	-0.160737	0.470172	0.876186
Glutamic Acid/4-hydroxyproline	MSEL VR	MSEL Visual Reception T-score	29.7931	31.5458	0.944438	-0.133551	0.471657	0.877167
Octanoylcarnitine/Citrate	MSEL DQ	MSEL Developmental Quotient (DQ)	60.96	62.7017	0.972222	-0.118817	0.471345	0.877167
Pyruvate/Palmitoylcarnitine	AgeMonths	Participants age in months	36.2308	35.0559	1.03351	0.148602	0.474266	0.88023
↑C10C8C6	BMI	Participants body mass index	16.8946	16.6605	1.01405	0.0950673	0.473942	0.88023
Lys/Phe	ADOS-2 SA CSS	ADOS-2 Module-1 or Module-2 Social Affect Calibrated Severity Score	7.15	6.83792	1.04564	0.17314	0.475261	0.880291
Lysine/Phenylalanine	ADOS-2 SA CSS	ADOS-2 Module-1 or Module-2 Social Affect Calibrated Severity Score	7.15	6.83792	1.04564	0.17314	0.475261	0.880291
Lactate/Lysine	ADOS-2 Comparison Score	ADOS-2 Module-1 or Module-2 Comparison Severity Score	7.5	7.09063	1.05773	0.211347	0.47773	0.88397
Octanoylcarnitine/Isoleucine	BMI	Participants body mass index	17.3843	16.6675	1.04301	0.191956	0.478235	0.88401
Malate/Homoserine	MSEL FM	MSEL Fine Motor T-score	29.8519	28.2872	1.05531	0.144065	0.479301	0.885087
Glutamic Acid/4-hydroxyproline	MSEL DQ	MSEL Developmental Quotient (DQ)	60.5862	62.8614	0.963806	-0.133654	0.483381	0.885273
Glycine/a-Ketoglutarate	ADOS-2 SA CSS	ADOS-2 Module-1 or Module-2 Social Affect Calibrated Severity Score	7.11538	6.85313	1.03827	0.147654	0.483576	0.885273
Lactate	MSEL EL	MSEL Expressive Language T-score	26.6154	28.1359	0.945959	-0.144438	0.482576	0.885273
Lactate/Serine	MSEL EL	MSEL Expressive Language T-score	26.6667	28.1362	0.947772	-0.140622	0.483064	0.885273
Leu/Val	MSEL VR	MSEL Visual Reception T-score	29.8125	31.5408	0.945205	-0.127953	0.483756	0.885273
Leucine/Valine	MSEL VR	MSEL Visual Reception T-score	29.8125	31.5408	0.945205	-0.127953	0.483756	0.885273
Pyruvate/Glutamic Acid	MSEL DQ	MSEL Developmental Quotient (DQ)	64.5102	62.471	1.03264	0.112139	0.480082	0.885273
Taurine/Carnitine	MSEL VR	MSEL Visual Reception T-score	33.44	31.3305	1.06733	0.150427	0.481034	0.885273
Xanthine/Carnitine	MSEL DQ	MSEL Developmental Quotient (DQ)	60.3333	62.7188	0.961965	-0.139516	0.48278	0.885273
Lactate/Palmitoylcarnitine	MSEL EL	MSEL Expressive Language T-score	27.1731	28.1617	0.964894	-0.0984625	0.484761	0.886226
Lysine/a-Ketoglutarate	BMI	Participants body mass index	17.0997	16.6782	1.02527	0.164312	0.485394	0.886499
Alanine/a-Ketoglutarate	BMI	Participants body mass index	16.9917	16.6797	1.0187	0.142246	0.487081	0.887754
Citrulline/Glutarylcarnitine	MSEL EL	MSEL Expressive Language T-score	27.1042	28.1603	0.962497	-0.103312	0.488507	0.887754
Lactate/Homoserine	ADOS-2 RRB CSS	ADOS-2 Module-1 or Module-2 Restrictive Repetitive Calibrated Severity Score	7.375	7.81515	0.94368	-0.209076	0.487202	0.887754
Pyruvate/Phenylalanine	MSEL EL	MSEL Expressive Language T-score	26.9062	28.1355	0.95631	-0.122475	0.488326	0.887754
↑TauXan↓C16	BMI	Participants body mass index	16.4898	16.7307	0.985601	-0.112345	0.487724	0.887754
Lactate/Ethanolamine	ADOS-2 RRB CSS	ADOS-2 Module-1 or Module-2 Restrictive Repetitive Calibrated Severity Score	7.38889	7.81707	0.945224	-0.198333	0.490008	0.888716
Leucine	ADOS-2 SA CSS	ADOS-2 Module-1 or Module-2 Social Affect Calibrated Severity Score	7.15789	6.84498	1.04571	0.172486	0.489885	0.888716
Alanine/Carnitine	ADOS-2 RRB CSS	ADOS-2 Module-1 or Module-2 Restrictive Repetitive Calibrated Severity Score	7.52174	7.81424	0.962568	-0.158963	0.490601	0.888911
Lactate/Ethanolamine	MSEL EL	MSEL Expressive Language T-score	26.871	28.1352	0.955066	-0.124823	0.49125	0.889025
↓Hydroxyproline	AgeMonths	Participants age in months	35.7188	34.9655	1.02154	0.0945137	0.491635	0.889025
Glycine/Methionine	MSEL EL	MSEL Expressive Language T-score	29.4194	27.9936	1.05093	0.132272	0.492272	0.889296
Alanine/Lysine	AgeMonths	Participants age in months	34.2766	35.1197	0.975992	-0.106899	0.494	0.891538
Arginine/Citrate	ADOS-2 RRB CSS	ADOS-2 Module-1 or Module-2 Restrictive Repetitive Calibrated Severity Score	8	7.80062	1.02556	0.127646	0.509174	0.891664
Arginine/Citrate	MSEL RL	MSEL Receptive Language T-score	25.7742	27.0602	0.952476	-0.1182	0.507676	0.891664
Decanoylcarnitine/Phenylalanine	AgeMonths	Participants age in months	36.0769	35.0645	1.02887	0.134349	0.496353	0.891664
Ethanolamine/4-hydroxyproline	BMI	Participants body mass index	16.5161	16.7144	0.988138	-0.1102	0.503323	0.891664
Ethanolamine/a-Ketoglutarate	BMI	Participants body mass index	16.8582	16.6844	1.01042	0.094674	0.500627	0.891664
Glutamic Acid/4-hydroxyproline	MSEL EL	MSEL Expressive Language T-score	26.8621	28.1599	0.953912	-0.126325	0.504885	0.891664
Glycine/Asparagine	ADOS-2 SA CSS	ADOS-2 Module-1 or Module-2 Social Affect Calibrated Severity Score	7.13043	6.84308	1.04199	0.154677	0.50492	0.891664
Glycine/Isoleucine	MSEL VR	MSEL Visual Reception T-score	30.1316	31.5488	0.955078	-0.109155	0.498142	0.891664
Hexanoylcarnitine/Leucine	MSEL RL	MSEL Receptive Language T-score	26	27.0439	0.961401	-0.103357	0.499014	0.891664
Lactate/Aspartic Acid	MSEL EL	MSEL Expressive Language T-score	27	28.1463	0.959274	-0.110613	0.50708	0.891664
Lactate/Glutamine	ADOS-2 SA CSS	ADOS-2 Module-1 or Module-2 Social Affect Calibrated Severity Score	6.61111	6.8872	0.959913	-0.16107	0.507454	0.891664
Lactate/Serine	MSEL VR	MSEL Visual Reception T-score	29.7778	31.5319	0.944369	-0.132001	0.497745	0.891664
Lactate/Tyrosine	MSEL VR	MSEL Visual Reception T-score	30	31.5421	0.951109	-0.115609	0.508797	0.891664
Lactate/Xanthine	MSEL DQ	MSEL Developmental Quotient (DQ)	60.6774	62.7162	0.967491	-0.122287	0.49894	0.891664
Lys/Gln	MSEL DQ	MSEL Developmental Quotient (DQ)	60.48	62.7844	0.963297	-0.137017	0.498812	0.891664
Lysine/Glutamine	MSEL DQ	MSEL Developmental Quotient (DQ)	60.48	62.7844	0.963297	-0.137017	0.498812	0.891664
Lysine/a-Ketoglutarate	MSEL VR	MSEL Visual Reception T-score	33.1071	31.312	1.05733	0.132015	0.500585	0.891664
Octanoylcarnitine/4-hydroxyproline	ADOS-2 SA CSS	ADOS-2 Module-1 or Module-2 Social Affect Calibrated Severity Score	6.63158	6.88854	0.962697	-0.154363	0.498935	0.891664
Ornithine/Carnitine	ADOS-2 Comparison Score	ADOS-2 Module-1 or Module-2 Comparison Severity Score	7.32143	7.09748	1.03155	0.129139	0.496113	0.891664
Pyruvate/Carnitine	MSEL RL	MSEL Receptive Language T-score	25.7059	27.067	0.949715	-0.12101	0.495313	0.891664
Pyruvate/Octanoylcarnitine	ADOS-2 RRB CSS	ADOS-2 Module-1 or Module-2 Restrictive Repetitive Calibrated Severity Score	7.47619	7.81366	0.95681	-0.169946	0.502936	0.891664
Threonine/Valine	MSEL VR	MSEL Visual Reception T-score	29.5385	31.5339	0.936721	-0.140612	0.506382	0.891664
Tryptophan/a-Ketoglutarate	AgeMonths	Participants age in months	35.8222	34.9912	1.02375	0.105662	0.505354	0.891664
Tryptophan/a-Ketoglutarate	MSEL VR	MSEL Visual Reception T-score	32.9778	31.2832	1.05417	0.112844	0.508051	0.891664
a-Ketoglutarate/Valine	ADOS-2 Comparison Score	ADOS-2 Module-1 or Module-2 Comparison Severity Score	7.40909	7.10526	1.04276	0.158268	0.502485	0.891664
aKG/Val	ADOS-2 Comparison Score	ADOS-2 Module-1 or Module-2 Comparison Severity Score	7.40909	7.10526	1.04276	0.158268	0.502485	0.891664
gamma-Aminobutyric Acid/Hexanoylcarnitine	MSEL DQ	MSEL Developmental Quotient (DQ)	65.6	62.4528	1.05039	0.155614	0.508753	0.891664
↑C10C8C6	MSEL VR	MSEL Visual Reception T-score	30.5789	31.5859	0.968121	-0.0755337	0.499812	0.891664
↑Ornithine	AgeMonths	Participants age in months	35.5495	34.9534	1.01705	0.0771893	0.502755	0.891664
↓Citrate	MSEL DQ	MSEL Developmental Quotient (DQ)	61.5521	62.9401	0.977946	-0.0781304	0.504564	0.891664
↓Urate	ADOS-2 SA CSS	ADOS-2 Module-1 or Module-2 Social Affect Calibrated Severity Score	7.07407	6.8558	1.03184	0.12963	0.507986	0.891664
Glycine/Asparagine	AgeMonths	Participants age in months	34.2571	35.1228	0.975352	-0.113332	0.51305	0.894282
Lactate/Xanthine	BMI	Participants body mass index	17.0066	16.6645	1.02053	0.141272	0.512727	0.894282
Pyruvate/Hexanoylcarnitine	BMI	Participants body mass index	16.9432	16.6855	1.01544	0.116364	0.513658	0.894282
Pyruvate/a-Ketoglutarate	MSEL FM	MSEL Fine Motor T-score	29.5854	28.2632	1.04678	0.114703	0.51329	0.894282
Xanthine/Carnitine	MSEL FM	MSEL Fine Motor T-score	26.8148	28.3265	0.946633	-0.135982	0.51409	0.894282
↑Glycine	MSEL EL	MSEL Expressive Language T-score	28.9833	27.959	1.03664	0.0938764	0.513291	0.894282
↑Taurine	MSEL RL	MSEL Receptive Language T-score	28.0154	26.8618	1.04295	0.0937606	0.511572	0.894282
↑LacPyr↓(C6-C16)	MSEL VR	MSEL Visual Reception T-score	30.5444	31.581	0.967176	-0.0761445	0.514636	0.894382
Lactate/Leucine	MSEL EL	MSEL Expressive Language T-score	26.9	28.1306	0.956253	-0.120545	0.516448	0.895829
Lactate/Ornithine	MSEL FM	MSEL Fine Motor T-score	29.5625	28.2903	1.04497	0.119416	0.516338	0.895829
Pyruvate/4-hydroxyproline	BMI	Participants body mass index	16.913	16.684	1.01373	0.11155	0.517368	0.896575
Lactate/Ethanolamine	ADOS-2 SA CSS	ADOS-2 Module-1 or Module-2 Social Affect Calibrated Severity Score	7.11111	6.85976	1.03664	0.151377	0.518166	0.897109
Glutamic Acid/4-hydroxyproline	ADOS-2 Comparison Score	ADOS-2 Module-1 or Module-2 Comparison Severity Score	7.40909	7.10154	1.04331	0.155737	0.518888	0.897509
Decanoylcarnitine/Phenylalanine	BMI	Participants body mass index	17.2967	16.6712	1.03752	0.17022	0.519833	0.898294
Taurine/Ethanolamine	MSEL RL	MSEL Receptive Language T-score	28.72	26.9219	1.06679	0.144294	0.520379	0.898391
Pyruvate/Proline	MSEL FM	MSEL Fine Motor T-score	29.7097	28.2833	1.05043	0.126311	0.521361	0.89913
↑Ornithine	BMI	Participants body mass index	16.8426	16.6676	1.0105	0.0795826	0.52179	0.89913
Arg/4hyp	MSEL RL	MSEL Receptive Language T-score	28.3333	26.9247	1.05232	0.119523	0.524199	0.899371
Arginine/4-hydroxyproline	MSEL RL	MSEL Receptive Language T-score	28.3333	26.9247	1.05232	0.119523	0.524199	0.899371
Lactate/Asparagine	MSEL FM	MSEL Fine Motor T-score	29.7037	28.2957	1.04976	0.129851	0.522699	0.899371
Octanoylcarnitine/Glutamic Acid	MSEL VR	MSEL Visual Reception T-score	32.9688	31.281	1.05395	0.12059	0.524387	0.899371
Pyruvate/Hexanoylcarnitine	MSEL RL	MSEL Receptive Language T-score	28.2093	26.8504	1.05061	0.110288	0.523884	0.899371
Homoserine/Isoleucine	AgeMonths	Participants age in months	34.1875	35.1221	0.973391	-0.118528	0.525557	0.899691
Pyruvate/a-Ketoglutarate	ADOS-2 RRB CSS	ADOS-2 Module-1 or Module-2 Restrictive Repetitive Calibrated Severity Score	7.52174	7.81424	0.962568	-0.151561	0.525515	0.899691
↓Urate	ADOS-2 Comparison Score	ADOS-2 Module-1 or Module-2 Comparison Severity Score	7.33333	7.09718	1.03327	0.129338	0.526196	0.899943
Arginine/Phenylalanine	ADOS-2 RRB CSS	ADOS-2 Module-1 or Module-2 Restrictive Repetitive Calibrated Severity Score	8	7.81288	1.02395	0.123688	0.527605	0.901324
Citrate	MSEL RL	MSEL Receptive Language T-score	28.8462	26.8705	1.07353	0.146341	0.527989	0.901324
Lactate/Proline	BMI	Participants body mass index	16.53	16.7091	0.989284	-0.0997897	0.53383	0.902163
Lactate/Threonine	ADOS-2 SA CSS	ADOS-2 Module-1 or Module-2 Social Affect Calibrated Severity Score	6.66667	6.88615	0.968126	-0.13353	0.533391	0.902163
Leucine/Glutarylcarnitine	ADOS-2 SA CSS	ADOS-2 Module-1 or Module-2 Social Affect Calibrated Severity Score	6.61111	6.88308	0.960488	-0.155511	0.529425	0.902163
Malate/Homoserine	ADOS-2 SA CSS	ADOS-2 Module-1 or Module-2 Social Affect Calibrated Severity Score	6.6	6.8852	0.958578	-0.166559	0.53073	0.902163
Octanoylcarnitine/Glutamic Acid	BMI	Participants body mass index	17.1748	16.6727	1.03011	0.148665	0.533091	0.902163
Ornithine/Lysine	MSEL DQ	MSEL Developmental Quotient (DQ)	60.8462	62.8235	0.968525	-0.109428	0.532764	0.902163
Pyruvate/Aspartic Acid	MSEL VR	MSEL Visual Reception T-score	33.1034	31.3333	1.05649	0.124732	0.533903	0.902163
Pyruvate/Proline	BMI	Participants body mass index	16.5476	16.7088	0.990356	-0.0919231	0.529482	0.902163
Serine/Citrate	ADOS-2 SA CSS	ADOS-2 Module-1 or Module-2 Social Affect Calibrated Severity Score	7.06897	6.85489	1.03123	0.122683	0.532668	0.902163
Taurine/Palmitoylcarnitine	MSEL EL	MSEL Expressive Language T-score	29.1935	27.9804	1.04336	0.116363	0.533018	0.902163
↑C10C8C6	MSEL EL	MSEL Expressive Language T-score	27.4632	28.1995	0.973888	-0.0709919	0.53141	0.902163
Octanoylcarnitine/Valine	MSEL RL	MSEL Receptive Language T-score	27.9697	26.8972	1.03988	0.102526	0.535968	0.903983
Pyruvate/Octanoylcarnitine	ADOS-2 SA CSS	ADOS-2 Module-1 or Module-2 Social Affect Calibrated Severity Score	7.09524	6.85404	1.03519	0.139913	0.535695	0.903983
Ethanolamine/a-Ketoglutarate	MSEL EL	MSEL Expressive Language T-score	27.0256	28.1441	0.960259	-0.105237	0.537989	0.905948
Lysine/a-Ketoglutarate	MSEL RL	MSEL Receptive Language T-score	28.25	26.8761	1.05112	0.120988	0.538123	0.905948
Lactate/Ornithine	MSEL VR	MSEL Visual Reception T-score	32.75	31.3462	1.04478	0.107705	0.538779	0.906218
Lys/Phe	AgeMonths	Participants age in months	35.963	34.9873	1.02789	0.124021	0.539939	0.906503
Lysine/Phenylalanine	AgeMonths	Participants age in months	35.963	34.9873	1.02789	0.124021	0.539939	0.906503
Lactate/Asparagine	MSEL EL	MSEL Expressive Language T-score	26.7778	28.1298	0.951937	-0.125699	0.541376	0.907251
↑Arginine	MSEL VR	MSEL Visual Reception T-score	30.4107	31.5747	0.963137	-0.0861401	0.541369	0.907251
Glycine/Arginine	MSEL RL	MSEL Receptive Language T-score	28.3429	26.9179	1.05294	0.115255	0.543383	0.908119
Lactate/Histidine	ADOS-2 Comparison Score	ADOS-2 Module-1 or Module-2 Comparison Severity Score	7.36842	7.10123	1.03763	0.146486	0.543355	0.908119
↓C5DC	ADOS-2 Comparison Score	ADOS-2 Module-1 or Module-2 Comparison Severity Score	7.27907	7.09	1.02667	0.101787	0.54307	0.908119
Lactate/Histidine	BMI	Participants body mass index	16.8699	16.6658	1.01225	0.106153	0.543977	0.908283
Decanoylcarnitine/Valine	BMI	Participants body mass index	17.1485	16.6745	1.02843	0.140047	0.545415	0.909133
Ethanolamine/Urate	MSEL RL	MSEL Receptive Language T-score	25.44	27.0551	0.940304	-0.132536	0.54866	0.909133
Glutamine	BMI	Participants body mass index	16.9993	16.6858	1.01879	0.140049	0.549454	0.909133
Glycine/Asparagine	ADOS-2 Comparison Score	ADOS-2 Module-1 or Module-2 Comparison Severity Score	7.34783	7.09538	1.03558	0.13553	0.546519	0.909133
Glycine/Lysine	MSEL FM	MSEL Fine Motor T-score	27.1923	28.4322	0.956391	-0.119414	0.547464	0.909133
Hexanoylcarnitine/Leucine	BMI	Participants body mass index	16.5703	16.7181	0.991162	-0.083276	0.547554	0.909133
Octanoylcarnitine/Isoleucine	ADOS-2 Comparison Score	ADOS-2 Module-1 or Module-2 Comparison Severity Score	6.875	7.12538	0.964861	-0.146201	0.548811	0.909133
Pyruvate/Kynurenine	MSEL RL	MSEL Receptive Language T-score	26.1042	27.0668	0.964434	-0.0880022	0.548008	0.909133
Pyruvate/a-Ketoglutarate	BMI	Participants body mass index	16.8519	16.6846	1.01003	0.0881701	0.549397	0.909133
↑TauXan↓C16	AgeMonths	Participants age in months	34.449	35.1923	0.978878	-0.0933114	0.54717	0.909133
Lactate/Serine	ADOS-2 Comparison Score	ADOS-2 Module-1 or Module-2 Comparison Severity Score	7.4	7.10272	1.04185	0.162587	0.550086	0.909357
Lactate/Sarcosine	ADOS-2 Comparison Score	ADOS-2 Module-1 or Module-2 Comparison Severity Score	6.76923	7.12913	0.949517	-0.184499	0.550901	0.909881
Arginine/Citrate	MSEL DQ	MSEL Developmental Quotient (DQ)	60.9677	62.8	0.970824	-0.108572	0.552528	0.911179
Lys/Phe	MSEL EL	MSEL Expressive Language T-score	29.2222	27.9894	1.04405	0.118222	0.55318	0.911179
Lysine/Phenylalanine	MSEL EL	MSEL Expressive Language T-score	29.2222	27.9894	1.04405	0.118222	0.55318	0.911179
Alanine/Lysine	ADOS-2 RRB CSS	ADOS-2 Module-1 or Module-2 Restrictive Repetitive Calibrated Severity Score	7.58621	7.81761	0.9704	-0.123446	0.555536	0.912329
Arginine/Leucine	ADOS-2 SA CSS	ADOS-2 Module-1 or Module-2 Social Affect Calibrated Severity Score	7.09091	6.85231	1.03482	0.134079	0.556972	0.912329
Ethanolamine/Citrate	MSEL FM	MSEL Fine Motor T-score	29.7241	28.2885	1.05075	0.122638	0.557212	0.912329
Glutamic Acid/4-hydroxyproline	MSEL FM	MSEL Fine Motor T-score	27.3103	28.4968	0.958365	-0.112366	0.556298	0.912329
Lactate/Threonine	MSEL EL	MSEL Expressive Language T-score	27	28.1339	0.959696	-0.106812	0.557344	0.912329
Malate/4-hydroxyproline	ADOS-2 RRB CSS	ADOS-2 Module-1 or Module-2 Restrictive Repetitive Calibrated Severity Score	8	7.80368	1.02516	0.126186	0.557368	0.912329
Octanoylcarnitine/Leucine	MSEL EL	MSEL Expressive Language T-score	29.16	27.9979	1.04151	0.116378	0.555274	0.912329
Citrate	MSEL DQ	MSEL Developmental Quotient (DQ)	65.3462	62.5244	1.04513	0.136273	0.558694	0.912867
Lactate/Arginine	ADOS-2 Comparison Score	ADOS-2 Module-1 or Module-2 Comparison Severity Score	7.34783	7.1087	1.03364	0.130013	0.558628	0.912867
Lactate/Lysine	MSEL FM	MSEL Fine Motor T-score	27.44	28.3758	0.967021	-0.100161	0.564166	0.91771
Lactate/Taurine	MSEL EL	MSEL Expressive Language T-score	27.1538	28.1332	0.965189	-0.0953195	0.563742	0.91771
Lactate/Xanthine	MSEL VR	MSEL Visual Reception T-score	29.9355	31.4416	0.952097	-0.109152	0.563804	0.91771
Pyruvate/Homoserine	BMI	Participants body mass index	16.8923	16.6833	1.01253	0.101431	0.562946	0.91771
Pyruvate/Homoserine	MSEL VR	MSEL Visual Reception T-score	30.3611	31.5206	0.963215	-0.0917849	0.563775	0.91771
Arginine/Carnitine	ADOS-2 SA CSS	ADOS-2 Module-1 or Module-2 Social Affect Calibrated Severity Score	7.09091	6.86378	1.03309	0.129496	0.565403	0.918422
Lactate/Isoleucine	MSEL FM	MSEL Fine Motor T-score	27.4643	28.4264	0.966153	-0.0995555	0.565607	0.918422
Ethanolamine/Citrate	MSEL RL	MSEL Receptive Language T-score	25.8966	27.0406	0.957692	-0.104556	0.572972	0.919771
Glycine/Leucine	ADOS-2 SA CSS	ADOS-2 Module-1 or Module-2 Social Affect Calibrated Severity Score	6.625	6.87349	0.963848	-0.145611	0.569237	0.919771
Homoserine/Citrate	MSEL DQ	MSEL Developmental Quotient (DQ)	64.7586	62.5427	1.03543	0.118302	0.56857	0.919771
Homoserine/Leucine	ADOS-2 RRB CSS	ADOS-2 Module-1 or Module-2 Restrictive Repetitive Calibrated Severity Score	8	7.7958	1.02619	0.13191	0.569162	0.919771
Lactate/Homocitrulline	ADOS-2 Comparison Score	ADOS-2 Module-1 or Module-2 Comparison Severity Score	7.30769	7.1	1.02925	0.115368	0.572887	0.919771
Ornithine/Carnitine	ADOS-2 RRB CSS	ADOS-2 Module-1 or Module-2 Restrictive Repetitive Calibrated Severity Score	7.92857	7.78302	1.0187	0.094962	0.572263	0.919771
Ornithine/Lysine	MSEL VR	MSEL Visual Reception T-score	30.1282	31.5272	0.955625	-0.0987948	0.570113	0.919771
Pyruvate/Aspartic Acid	MSEL DQ	MSEL Developmental Quotient (DQ)	64.8276	62.5385	1.0366	0.119188	0.57252	0.919771
Pyruvate/Sarcosine	AgeMonths	Participants age in months	34.0882	35.1382	0.970118	-0.114603	0.571271	0.919771
Taurine/Carnitine	ADOS-2 RRB CSS	ADOS-2 Module-1 or Module-2 Restrictive Repetitive Calibrated Severity Score	7.41176	7.81459	0.948452	-0.173503	0.568555	0.919771
Taurine/Phenylalanine	MSEL VR	MSEL Visual Reception T-score	30.3846	31.5304	0.96366	-0.089337	0.568355	0.919771
↑LacPyr↓(C6-C16)	ADOS-2 RRB CSS	ADOS-2 Module-1 or Module-2 Restrictive Repetitive Calibrated Severity Score	7.92593	7.76817	1.02031	0.0873158	0.570212	0.919771
↓Citrate	ADOS-2 SA CSS	ADOS-2 Module-1 or Module-2 Social Affect Calibrated Severity Score	6.98551	6.84477	1.02056	0.0785455	0.571435	0.919771
Octanoylcarnitine/4-hydroxyproline	ADOS-2 Comparison Score	ADOS-2 Module-1 or Module-2 Comparison Severity Score	6.89474	7.13622	0.966161	-0.133863	0.574633	0.921628
Octanoylcarnitine/Leucine	ADOS-2 RRB CSS	ADOS-2 Module-1 or Module-2 Restrictive Repetitive Calibrated Severity Score	7.61111	7.80308	0.975399	-0.121314	0.577655	0.925664
Decanoylcarnitine/Valine	ADOS-2 SA CSS	ADOS-2 Module-1 or Module-2 Social Affect Calibrated Severity Score	6.69565	6.89028	0.971753	-0.114988	0.588079	0.9279
Ethanolamine/Carnitine	MSEL VR	MSEL Visual Reception T-score	29.8889	31.5255	0.948085	-0.113741	0.587734	0.9279
Ethanolamine/Urate	MSEL VR	MSEL Visual Reception T-score	29.84	31.5212	0.946665	-0.117379	0.588506	0.9279
Glycine/Hexanoylcarnitine	AgeMonths	Participants age in months	35.9	35.0672	1.02375	0.106206	0.579942	0.9279
Lactate/Citrulline	MSEL FM	MSEL Fine Motor T-score	27.4	28.4459	0.963232	-0.097672	0.581262	0.9279
Leucine/Glutarylcarnitine	BMI	Participants body mass index	16.9352	16.6933	1.01449	0.113167	0.583518	0.9279
Lys/Gln	ADOS-2 SA CSS	ADOS-2 Module-1 or Module-2 Social Affect Calibrated Severity Score	7.0625	6.84592	1.03164	0.131962	0.589191	0.9279
Lysine/Glutamine	ADOS-2 SA CSS	ADOS-2 Module-1 or Module-2 Social Affect Calibrated Severity Score	7.0625	6.84592	1.03164	0.131962	0.589191	0.9279
Octanoylcarnitine/Carnitine	ADOS-2 RRB CSS	ADOS-2 Module-1 or Module-2 Restrictive Repetitive Calibrated Severity Score	7.6	7.80495	0.973741	-0.121992	0.586653	0.9279
Octanoylcarnitine/Glutamic Acid	ADOS-2 RRB CSS	ADOS-2 Module-1 or Module-2 Restrictive Repetitive Calibrated Severity Score	7.96154	7.77918	1.02344	0.108895	0.580613	0.9279
Octanoylcarnitine/Glutamic Acid	ADOS-2 SA CSS	ADOS-2 Module-1 or Module-2 Social Affect Calibrated Severity Score	7.03846	6.85489	1.02678	0.108943	0.583436	0.9279
Octanoylcarnitine/Glutamic Acid	MSEL EL	MSEL Expressive Language T-score	27.0625	28.1264	0.962176	-0.100635	0.588996	0.9279
Octanoylcarnitine/Valine	ADOS-2 SA CSS	ADOS-2 Module-1 or Module-2 Social Affect Calibrated Severity Score	6.69565	6.89028	0.971753	-0.115847	0.582133	0.9279
Ornithine/Lysine	BMI	Participants body mass index	16.5546	16.717	0.990283	-0.0845951	0.58719	0.9279
Pyruvate/Carnitine	ADOS-2 RRB CSS	ADOS-2 Module-1 or Module-2 Restrictive Repetitive Calibrated Severity Score	7.55	7.80982	0.966732	-0.136851	0.587318	0.9279
Pyruvate/Homoserine	ADOS-2 RRB CSS	ADOS-2 Module-1 or Module-2 Restrictive Repetitive Calibrated Severity Score	7.54545	7.81173	0.965914	-0.134637	0.586481	0.9279
Pyruvate/Proline	ADOS-2 SA CSS	ADOS-2 Module-1 or Module-2 Social Affect Calibrated Severity Score	7.11111	6.85976	1.03664	0.139234	0.584946	0.9279
Serine/Urate	MSEL FM	MSEL Fine Motor T-score	29.7241	28.2885	1.05075	0.117656	0.583715	0.9279
↓aKG1	MSEL VR	MSEL Visual Reception T-score	30.3966	31.574	0.962707	-0.0811932	0.583442	0.9279
↓aKG2	ADOS-2 RRB CSS	ADOS-2 Module-1 or Module-2 Restrictive Repetitive Calibrated Severity Score	7.66667	7.81395	0.981151	-0.0865454	0.581932	0.9279
Lysine/a-Ketoglutarate	ADOS-2 SA CSS	ADOS-2 Module-1 or Module-2 Social Affect Calibrated Severity Score	7.08696	6.85093	1.03445	0.125867	0.589857	0.92815
Alanine/Kynurenine	ADOS-2 RRB CSS	ADOS-2 Module-1 or Module-2 Restrictive Repetitive Calibrated Severity Score	8.05	7.78963	1.03342	0.136196	0.590825	0.928875
Glycine/a-Ketoglutarate	AgeMonths	Participants age in months	35.7778	35.0108	1.02191	0.0958287	0.591732	0.929502
Ethanolamine/Urate	BMI	Participants body mass index	16.5374	16.7067	0.98987	-0.0944757	0.593836	0.931194
Glycine/Leucine	MSEL DQ	MSEL Developmental Quotient (DQ)	61.2	62.8124	0.97433	-0.0970895	0.594336	0.931194
Lactate/Citrulline	ADOS-2 Comparison Score	ADOS-2 Module-1 or Module-2 Comparison Severity Score	7.33333	7.10154	1.03264	0.124759	0.593354	0.931194
↓C5DC	ADOS-2 SA CSS	ADOS-2 Module-1 or Module-2 Social Affect Calibrated Severity Score	7	6.85	1.0219	0.0865299	0.595364	0.932007
Glycine/Phenylalanine	AgeMonths	Participants age in months	35.7353	35.0129	1.02063	0.0938078	0.596105	0.932369
Alanine/Valine	AgeMonths	Participants age in months	34.3462	35.0932	0.978712	-0.101103	0.598091	0.933972
Malate/Carnitine	AgeMonths	Participants age in months	34.5	35.1298	0.982073	-0.0798416	0.598151	0.933972
Glycine/Lysine	MSEL DQ	MSEL Developmental Quotient (DQ)	60.8462	62.7691	0.969365	-0.108861	0.601472	0.934376
Lactate/Ethanolamine	ADOS-2 Comparison Score	ADOS-2 Module-1 or Module-2 Comparison Severity Score	7.33333	7.10366	1.03233	0.127651	0.601035	0.934376
Lactate/Malate	MSEL DQ	MSEL Developmental Quotient (DQ)	61.2619	62.8022	0.975474	-0.0870553	0.600403	0.934376
Lactate/Methionine	ADOS-2 SA CSS	ADOS-2 Module-1 or Module-2 Social Affect Calibrated Severity Score	6.66667	6.88415	0.968409	-0.127031	0.599799	0.934376
Pyruvate/Aspartic Acid	ADOS-2 SA CSS	ADOS-2 Module-1 or Module-2 Social Affect Calibrated Severity Score	7.09524	6.85846	1.03452	0.126943	0.601039	0.934376
↓C5DC	ADOS-2 RRB CSS	ADOS-2 Module-1 or Module-2 Restrictive Repetitive Calibrated Severity Score	7.65116	7.81333	0.979244	-0.089118	0.60104	0.934376
Arginine/Tyrosine	MSEL RL	MSEL Receptive Language T-score	26.0571	27.0907	0.961848	-0.0911108	0.604325	0.934542
Decanoylcarnitine/4-hydroxyproline	ADOS-2 RRB CSS	ADOS-2 Module-1 or Module-2 Restrictive Repetitive Calibrated Severity Score	7.65217	7.82445	0.977982	-0.106778	0.602104	0.934542
Glycine/Carnitine	ADOS-2 RRB CSS	ADOS-2 Module-1 or Module-2 Restrictive Repetitive Calibrated Severity Score	7.65789	7.81169	0.980312	-0.0890403	0.604644	0.934542
Lactate/Aspartic Acid	MSEL DQ	MSEL Developmental Quotient (DQ)	61.4615	62.7751	0.979075	-0.0810348	0.604145	0.934542
Malate/4-hydroxyproline	AgeMonths	Participants age in months	34.3448	35.0921	0.978706	-0.0979887	0.603639	0.934542
Malate/Carnitine	BMI	Participants body mass index	16.8462	16.6823	1.00982	0.0793445	0.603691	0.934542
Ethanolamine/Citrate	ADOS-2 Comparison Score	ADOS-2 Module-1 or Module-2 Comparison Severity Score	7.30435	7.10217	1.02847	0.111992	0.606506	0.934657
Glycine/a-Ketoglutarate	MSEL RL	MSEL Receptive Language T-score	25.8889	27.0586	0.956772	-0.0958162	0.605732	0.934657
Homoserine/Citrate	ADOS-2 RRB CSS	ADOS-2 Module-1 or Module-2 Restrictive Repetitive Calibrated Severity Score	7.95652	7.78328	1.02226	0.105557	0.606147	0.934657
Homoserine/Leucine	MSEL DQ	MSEL Developmental Quotient (DQ)	61.2143	62.8047	0.974677	-0.0963186	0.606761	0.934657
Arginine/Citrate	AgeMonths	Participants age in months	35.6774	35.0065	1.01917	0.0881389	0.628937	0.93478
Citrulline/Carnitine	ADOS-2 RRB CSS	ADOS-2 Module-1 or Module-2 Restrictive Repetitive Calibrated Severity Score	7.94737	7.78593	1.02073	0.102934	0.624638	0.93478
Decanoylcarnitine/4-hydroxyproline	MSEL RL	MSEL Receptive Language T-score	25.9375	27.048	0.958942	-0.0932286	0.629419	0.93478
Decanoylcarnitine/Isoleucine	AgeMonths	Participants age in months	35.75	35.0741	1.01927	0.0895284	0.616486	0.93478
Decanoylcarnitine/Isoleucine	MSEL FM	MSEL Fine Motor T-score	29	28.2353	1.02708	0.0784685	0.637846	0.93478
Eta/Kyn	ADOS-2 SA CSS	ADOS-2 Module-1 or Module-2 Social Affect Calibrated Severity Score	7.03846	6.84783	1.02784	0.103623	0.632316	0.93478
Eta/Kyn	BMI	Participants body mass index	16.5828	16.7091	0.992441	-0.0717561	0.616285	0.93478
Eta/Kyn	MSEL VR	MSEL Visual Reception T-score	30.3333	31.527	0.962138	-0.0843805	0.639873	0.93478
Ethanolamine/Carnitine	ADOS-2 Comparison Score	ADOS-2 Module-1 or Module-2 Comparison Severity Score	7.31579	7.10398	1.02982	0.113676	0.643619	0.93478
Ethanolamine/Carnitine	BMI	Participants body mass index	16.8827	16.6882	1.01165	0.0947718	0.638792	0.93478
Ethanolamine/Kynurenine	ADOS-2 SA CSS	ADOS-2 Module-1 or Module-2 Social Affect Calibrated Severity Score	7.03846	6.84783	1.02784	0.103623	0.632316	0.93478
Ethanolamine/Kynurenine	BMI	Participants body mass index	16.5828	16.7091	0.992441	-0.0717561	0.616285	0.93478
Ethanolamine/Kynurenine	MSEL VR	MSEL Visual Reception T-score	30.3333	31.527	0.962138	-0.0843805	0.639873	0.93478
Ethanolamine/a-Ketoglutarate	AgeMonths	Participants age in months	35.7179	35.0109	1.02019	0.0872446	0.616051	0.93478
Glycine/Arginine	ADOS-2 RRB CSS	ADOS-2 Module-1 or Module-2 Restrictive Repetitive Calibrated Severity Score	8.04545	7.80923	1.03025	0.120637	0.628074	0.93478
Glycine/Arginine	MSEL DQ	MSEL Developmental Quotient (DQ)	64.2286	62.6156	1.02576	0.0877753	0.638126	0.93478
Glycine/Asparagine	MSEL RL	MSEL Receptive Language T-score	28.0571	26.9332	1.04173	0.0919382	0.624789	0.93478
Glycine/Leucine	ADOS-2 Comparison Score	ADOS-2 Module-1 or Module-2 Comparison Severity Score	6.9375	7.12048	0.974302	-0.111407	0.629628	0.93478
Glycine/Malate	BMI	Participants body mass index	16.9376	16.6844	1.01517	0.108994	0.622399	0.93478
Glycine/Methionine	MSEL RL	MSEL Receptive Language T-score	28.0968	26.9402	1.04293	0.0958026	0.627049	0.93478
Glycine/Valine	ADOS-2 RRB CSS	ADOS-2 Module-1 or Module-2 Restrictive Repetitive Calibrated Severity Score	7.94737	7.80488	1.01826	0.0962817	0.611413	0.93478
Glycine/a-Ketoglutarate	MSEL DQ	MSEL Developmental Quotient (DQ)	60.9722	62.8048	0.970821	-0.0958579	0.613612	0.93478
Histidine/Leucine	AgeMonths	Participants age in months	34.3939	35.1054	0.979734	-0.0905495	0.620709	0.93478
Homoserine/Citrate	MSEL EL	MSEL Expressive Language T-score	29.0345	27.9957	1.0371	0.0958294	0.631715	0.93478
Homoserine/Isoleucine	ADOS-2 Comparison Score	ADOS-2 Module-1 or Module-2 Comparison Severity Score	7.31579	7.1003	1.03035	0.120436	0.611077	0.93478
Homoserine/Leucine	MSEL VR	MSEL Visual Reception T-score	30.2857	31.5096	0.96116	-0.0913516	0.635705	0.93478
Hypoxanthine/4-hydroxyproline	AgeMonths	Participants age in months	34.3929	35.1913	0.97731	-0.0999543	0.622565	0.93478
Lactate/4-hydroxyproline	ADOS-2 RRB CSS	ADOS-2 Module-1 or Module-2 Restrictive Repetitive Calibrated Severity Score	7.59091	7.82972	0.969499	-0.124773	0.611444	0.93478
Lactate/Alanine	ADOS-2 SA CSS	ADOS-2 Module-1 or Module-2 Social Affect Calibrated Severity Score	7.05882	6.86322	1.0285	0.11557	0.638104	0.93478
Lactate/Arginine	BMI	Participants body mass index	16.5871	16.7123	0.992509	-0.0691587	0.607572	0.93478
Lactate/Carnitine	ADOS-2 RRB CSS	ADOS-2 Module-1 or Module-2 Restrictive Repetitive Calibrated Severity Score	7.59091	7.80864	0.972116	-0.112723	0.643364	0.93478
Lactate/Carnitine	MSEL VR	MSEL Visual Reception T-score	30.3333	31.5151	0.962502	-0.0872959	0.627729	0.93478
Lactate/Glutamine	BMI	Participants body mass index	16.8495	16.6875	1.00971	0.0837363	0.61469	0.93478
Lactate/Hexanoylcarnitine	MSEL EL	MSEL Expressive Language T-score	27.2424	28.1157	0.968939	-0.0839034	0.642281	0.93478
Lactate/Homoserine	MSEL VR	MSEL Visual Reception T-score	30.3571	31.5011	0.963686	-0.0910266	0.608692	0.93478
Lactate/Malate	MSEL RL	MSEL Receptive Language T-score	26.0714	27.0571	0.963569	-0.0823486	0.628194	0.93478
Lactate/Proline	MSEL DQ	MSEL Developmental Quotient (DQ)	61.3571	62.7505	0.977795	-0.0860179	0.637709	0.93478
Lactate/Proline	MSEL EL	MSEL Expressive Language T-score	27.1071	28.113	0.964221	-0.0935917	0.64276	0.93478
Lactate/Sarcosine	MSEL FM	MSEL Fine Motor T-score	29.32	28.322	1.03524	0.0988707	0.611413	0.93478
Lactate/Urate	MSEL EL	MSEL Expressive Language T-score	27.2121	28.1164	0.967839	-0.0873242	0.627534	0.93478
Methionine/Leucine	AgeMonths	Participants age in months	34.4194	35.1047	0.980477	-0.0880142	0.637833	0.93478
Octanoylcarnitine/4-hydroxyproline	AgeMonths	Participants age in months	35.8	35.0624	1.02104	0.0957114	0.641967	0.93478
Octanoylcarnitine/4-hydroxyproline	BMI	Participants body mass index	16.5679	16.7183	0.991	-0.0829121	0.617695	0.93478
Octanoylcarnitine/4-hydroxyproline	MSEL EL	MSEL Expressive Language T-score	26.96	28.1183	0.958807	-0.107292	0.615488	0.93478
Octanoylcarnitine/Citrate	MSEL FM	MSEL Fine Motor T-score	29.12	28.2403	1.03115	0.0900848	0.632299	0.93478
Octanoylcarnitine/Isoleucine	MSEL RL	MSEL Receptive Language T-score	27.84	26.9227	1.03407	0.0877724	0.642398	0.93478
Octanoylcarnitine/Sarcosine	ADOS-2 Comparison Score	ADOS-2 Module-1 or Module-2 Comparison Severity Score	7.33333	7.09938	1.03295	0.119422	0.623812	0.93478
Octanoylcarnitine/Valine	AgeMonths	Participants age in months	35.7576	35.0635	1.0198	0.0899098	0.618071	0.93478
Ornithine/Citrate	MSEL DQ	MSEL Developmental Quotient (DQ)	61.4706	62.8094	0.978684	-0.0755634	0.619769	0.93478
Ornithine/Lysine	ADOS-2 RRB CSS	ADOS-2 Module-1 or Module-2 Restrictive Repetitive Calibrated Severity Score	7.90323	7.78797	1.0148	0.0750613	0.640978	0.93478
Ornithine/a-Ketoglutarate	MSEL RL	MSEL Receptive Language T-score	25.8824	27.054	0.956692	-0.0959077	0.615175	0.93478
Pyruvate/Aspartic Acid	MSEL FM	MSEL Fine Motor T-score	27.5517	28.4231	0.969343	-0.0873375	0.624327	0.93478
Pyruvate/Carnitine	MSEL VR	MSEL Visual Reception T-score	30.3235	31.5184	0.962091	-0.0885372	0.616798	0.93478
Pyruvate/Glutamic Acid	MSEL EL	MSEL Expressive Language T-score	28.898	27.9643	1.03339	0.080201	0.627562	0.93478
Pyruvate/Glutamic Acid	MSEL RL	MSEL Receptive Language T-score	27.8571	26.8772	1.03646	0.0775008	0.638782	0.93478
Pyruvate/Glutamic Acid	MSEL VR	MSEL Visual Reception T-score	32.3673	31.3348	1.03295	0.0738651	0.632863	0.93478
Pyruvate/Kynurenine	MSEL EL	MSEL Expressive Language T-score	27.375	28.1292	0.973189	-0.0745102	0.613539	0.93478
Pyruvate/Palmitoylcarnitine	MSEL RL	MSEL Receptive Language T-score	25.9231	27.028	0.959121	-0.0979427	0.629911	0.93478
Pyruvate/Proline	ADOS-2 Comparison Score	ADOS-2 Module-1 or Module-2 Comparison Severity Score	7.33333	7.10366	1.03233	0.122485	0.629389	0.93478
Pyruvate/Sarcosine	ADOS-2 Comparison Score	ADOS-2 Module-1 or Module-2 Comparison Severity Score	7.31818	7.10185	1.03046	0.111361	0.638437	0.93478
Serine/Leucine	ADOS-2 Comparison Score	ADOS-2 Module-1 or Module-2 Comparison Severity Score	6.92857	7.11976	0.973147	-0.116393	0.637465	0.93478
Taurine/Citrate	ADOS-2 RRB CSS	ADOS-2 Module-1 or Module-2 Restrictive Repetitive Calibrated Severity Score	7.59259	7.81191	0.971925	-0.107651	0.637381	0.93478
Xanthine/Histidine	MSEL VR	MSEL Visual Reception T-score	30.0833	31.4357	0.956981	-0.0988026	0.641021	0.93478
gamma-Aminobutyric Acid/Hexanoylcarnitine	MSEL RL	MSEL Receptive Language T-score	28.52	26.8863	1.06076	0.120692	0.610758	0.93478
↑C10C8C6	ADOS-2 RRB CSS	ADOS-2 Module-1 or Module-2 Restrictive Repetitive Calibrated Severity Score	7.87143	7.77289	1.01268	0.0597268	0.635503	0.93478
↑Glycine	ADOS-2 Comparison Score	ADOS-2 Module-1 or Module-2 Comparison Severity Score	7.25	7.09416	1.02197	0.0849817	0.619794	0.93478
↑Glycine	ADOS-2 SA CSS	ADOS-2 Module-1 or Module-2 Social Affect Calibrated Severity Score	7	6.84416	1.02277	0.0879445	0.609298	0.93478
↑Gly↓BCAA	ADOS-2 Comparison Score	ADOS-2 Module-1 or Module-2 Comparison Severity Score	7.22	7.09396	1.01777	0.072103	0.6258	0.93478
↑Malate	ADOS-2 Comparison Score	ADOS-2 Module-1 or Module-2 Comparison Severity Score	6.96552	7.12934	0.977022	-0.0928956	0.62484	0.93478
↑Taurine	ADOS-2 RRB CSS	ADOS-2 Module-1 or Module-2 Restrictive Repetitive Calibrated Severity Score	7.93478	7.78477	1.01927	0.0812608	0.628329	0.93478
↓Urate	AgeMonths	Participants age in months	34.4103	35.1223	0.979728	-0.0872722	0.617954	0.93478
↓aKG1	MSEL RL	MSEL Receptive Language T-score	26.2069	27.0752	0.967931	-0.0718687	0.627524	0.93478
↑Taurine	AgeMonths	Participants age in months	35.4769	35	1.01363	0.0614013	0.644394	0.935163
Ethanolamine/a-Ketoglutarate	ADOS-2 Comparison Score	ADOS-2 Module-1 or Module-2 Comparison Severity Score	7.2963	7.10031	1.0276	0.0997825	0.645319	0.935749
Methionine/Leucine	ADOS-2 Comparison Score	ADOS-2 Module-1 or Module-2 Comparison Severity Score	7.25	7.10366	1.0206	0.0912703	0.646242	0.935749
Taurine/a-Ketoglutarate	MSEL DQ	MSEL Developmental Quotient (DQ)	64	62.5301	1.02351	0.07651	0.646332	0.935749
Lactate/Threonine	ADOS-2 Comparison Score	ADOS-2 Module-1 or Module-2 Comparison Severity Score	6.95238	7.12615	0.975615	-0.0997128	0.647914	0.937298
Arginine/Citrate	ADOS-2 SA CSS	ADOS-2 Module-1 or Module-2 Social Affect Calibrated Severity Score	6.70833	6.89097	0.973497	-0.0993886	0.658476	0.937395
Decanoylcarnitine/4-hydroxyproline	MSEL EL	MSEL Expressive Language T-score	27.2188	28.1179	0.968022	-0.0845206	0.65142	0.937395
Decanoylcarnitine/4-hydroxyproline	MSEL VR	MSEL Visual Reception T-score	32.4688	31.3188	1.03672	0.0838867	0.650754	0.937395
Glycine/Leucine	ADOS-2 RRB CSS	ADOS-2 Module-1 or Module-2 Restrictive Repetitive Calibrated Severity Score	7.9375	7.79819	1.01786	0.0929339	0.659193	0.937395
Glycine/Methionine	ADOS-2 RRB CSS	ADOS-2 Module-1 or Module-2 Restrictive Repetitive Calibrated Severity Score	7.95238	7.79511	1.02018	0.0964398	0.649056	0.937395
Glycine/a-Ketoglutarate	ADOS-2 RRB CSS	ADOS-2 Module-1 or Module-2 Restrictive Repetitive Calibrated Severity Score	7.92308	7.78437	1.01782	0.0850527	0.656785	0.937395
Homoserine/Citrate	MSEL FM	MSEL Fine Motor T-score	27.4483	28.4295	0.965486	-0.0894178	0.651655	0.937395
Homoserine/Leucine	MSEL RL	MSEL Receptive Language T-score	26.1071	27.0658	0.96458	-0.0865953	0.649582	0.937395
Lactate/4-hydroxyproline	MSEL EL	MSEL Expressive Language T-score	27.2571	28.1193	0.969339	-0.0799241	0.660274	0.937395
Lactate/Homoserine	MSEL EL	MSEL Expressive Language T-score	27.1429	28.1109	0.965564	-0.0908778	0.649741	0.937395
Lactate/Kynurenine	MSEL FM	MSEL Fine Motor T-score	29.3333	28.3105	1.03613	0.089608	0.656425	0.937395
Lactate/Taurine	MSEL FM	MSEL Fine Motor T-score	27.641	28.4345	0.972095	-0.0742841	0.657958	0.937395
Octanoylcarnitine/Citrate	MSEL VR	MSEL Visual Reception T-score	32.52	31.3305	1.03797	0.0892949	0.659553	0.937395
Octanoylcarnitine/Glutamic Acid	ADOS-2 Comparison Score	ADOS-2 Module-1 or Module-2 Comparison Severity Score	7.26923	7.10095	1.0237	0.0923777	0.654261	0.937395
Ornithine/a-Ketoglutarate	ADOS-2 RRB CSS	ADOS-2 Module-1 or Module-2 Restrictive Repetitive Calibrated Severity Score	7.91667	7.78571	1.01682	0.0834198	0.657461	0.937395
Pyruvate/Glutamic Acid	ADOS-2 RRB CSS	ADOS-2 Module-1 or Module-2 Restrictive Repetitive Calibrated Severity Score	7.64706	7.8109	0.979024	-0.0867814	0.656808	0.937395
Taurine/4-hydroxyproline	MSEL FM	MSEL Fine Motor T-score	27.6486	28.4902	0.97046	-0.0771731	0.659974	0.937395
Taurine/Carnitine	MSEL EL	MSEL Expressive Language T-score	27.16	28.1038	0.966417	-0.0908809	0.659403	0.937395
Taurine/Ethanolamine	AgeMonths	Participants age in months	34.36	35.0992	0.978941	-0.0939599	0.653736	0.937395
Taurine/Malate	ADOS-2 RRB CSS	ADOS-2 Module-1 or Module-2 Restrictive Repetitive Calibrated Severity Score	7.58333	7.81056	0.970908	-0.10882	0.656544	0.937395
↑Ethanolamine	MSEL EL	MSEL Expressive Language T-score	27.5152	28.1392	0.977822	-0.0591796	0.65828	0.937395
↑LacPyr↓(C6-C16)	MSEL RL	MSEL Receptive Language T-score	26.4556	27.0848	0.976768	-0.0539287	0.65421	0.937395
↑LacPyr↓GlyAsp	ADOS-2 SA CSS	ADOS-2 Module-1 or Module-2 Social Affect Calibrated Severity Score	6.75556	6.89037	0.980435	-0.0747572	0.652659	0.937395
↓Glutamine	BMI	Participants body mass index	16.5337	16.7151	0.989146	-0.0823569	0.651079	0.937395
Decanoylcarnitine/Carnitine	MSEL RL	MSEL Receptive Language T-score	26.1389	27.0352	0.966848	-0.0777367	0.661746	0.937646
Ethanolamine/a-Ketoglutarate	MSEL RL	MSEL Receptive Language T-score	26.1282	27.0459	0.966071	-0.076767	0.662239	0.937646
Lys/Phe	BMI	Participants body mass index	16.9147	16.6926	1.01331	0.0982581	0.663013	0.937646
Lysine/Phenylalanine	BMI	Participants body mass index	16.9147	16.6926	1.01331	0.0982581	0.663013	0.937646
Tryptophan/a-Ketoglutarate	MSEL DQ	MSEL Developmental Quotient (DQ)	63.9556	62.5442	1.02256	0.0743405	0.662408	0.937646
Alanine/Phenylalanine	ADOS-2 SA CSS	ADOS-2 Module-1 or Module-2 Social Affect Calibrated Severity Score	7.0625	6.85241	1.03066	0.116202	0.666854	0.939164
Alanine/a-Ketoglutarate	MSEL FM	MSEL Fine Motor T-score	27.5333	28.4261	0.968593	-0.0823711	0.668911	0.939164
Decanoylcarnitine/Leucine	MSEL VR	MSEL Visual Reception T-score	32.3462	31.3376	1.03218	0.0800552	0.666038	0.939164
Lactate/Citrate	BMI	Participants body mass index	16.8101	16.6913	1.00712	0.0660374	0.665657	0.939164
Lactate/Citrulline	MSEL EL	MSEL Expressive Language T-score	27.3143	28.1126	0.971605	-0.0760935	0.667773	0.939164
Lactate/Lysine	BMI	Participants body mass index	16.5712	16.7093	0.991733	-0.0756457	0.667672	0.939164
Leucine	AgeMonths	Participants age in months	35.5806	35.0278	1.01578	0.0753045	0.666594	0.939164
Pyruvate/Carnitine	MSEL FM	MSEL Fine Motor T-score	27.5588	28.432	0.96929	-0.0794516	0.665592	0.939164
Pyruvate/Hexanoylcarnitine	MSEL DQ	MSEL Developmental Quotient (DQ)	63.8837	62.4911	1.02229	0.0741284	0.668895	0.939164
gamma-Aminobutyric Acid/Hexanoylcarnitine	MSEL VR	MSEL Visual Reception T-score	32.72	31.3197	1.04471	0.0949486	0.669219	0.939164
Citrate	ADOS-2 RRB CSS	ADOS-2 Module-1 or Module-2 Restrictive Repetitive Calibrated Severity Score	7.94444	7.78659	1.02027	0.0955081	0.681051	0.94041
Citrate	BMI	Participants body mass index	16.5692	16.7064	0.991786	-0.0735823	0.676319	0.94041
Decanoylcarnitine/Carnitine	ADOS-2 SA CSS	ADOS-2 Module-1 or Module-2 Social Affect Calibrated Severity Score	6.71429	6.88254	0.975554	-0.0893711	0.674217	0.94041
Ethanolamine/Carnitine	MSEL DQ	MSEL Developmental Quotient (DQ)	61.2222	62.7553	0.97557	-0.0860686	0.675931	0.94041
Ethanolamine/Urate	MSEL DQ	MSEL Developmental Quotient (DQ)	60.96	62.7627	0.971277	-0.0952333	0.671179	0.94041
Hexanoylcarnitine/Leucine	ADOS-2 SA CSS	ADOS-2 Module-1 or Module-2 Social Affect Calibrated Severity Score	7.04762	6.85714	1.02778	0.102279	0.672191	0.94041
Homoserine/Carnitine	ADOS-2 SA CSS	ADOS-2 Module-1 or Module-2 Social Affect Calibrated Severity Score	7.04167	6.86025	1.02644	0.0964371	0.673533	0.94041
Lactate/Alanine	ADOS-2 Comparison Score	ADOS-2 Module-1 or Module-2 Comparison Severity Score	7.29412	7.10638	1.02642	0.103999	0.67928	0.94041
Lactate/Arginine	ADOS-2 RRB CSS	ADOS-2 Module-1 or Module-2 Restrictive Repetitive Calibrated Severity Score	8	7.80124	1.02548	0.100958	0.679593	0.94041
Lactate/Carnitine	ADOS-2 SA CSS	ADOS-2 Module-1 or Module-2 Social Affect Calibrated Severity Score	7.04545	6.86111	1.02687	0.0984828	0.67866	0.94041
Lactate/Lysine	ADOS-2 RRB CSS	ADOS-2 Module-1 or Module-2 Restrictive Repetitive Calibrated Severity Score	7.5	7.8006	0.961464	-0.137207	0.67422	0.94041
Lactate/Proline	ADOS-2 SA CSS	ADOS-2 Module-1 or Module-2 Social Affect Calibrated Severity Score	6.70588	6.88146	0.974486	-0.102369	0.681103	0.94041
Octanoylcarnitine/Asparagine	ADOS-2 RRB CSS	ADOS-2 Module-1 or Module-2 Restrictive Repetitive Calibrated Severity Score	7.88889	7.78176	1.01377	0.0667061	0.677414	0.94041
Octanoylcarnitine/Carnitine	MSEL EL	MSEL Expressive Language T-score	28.931	28.0022	1.03317	0.0842265	0.67748	0.94041
Ornithine/Citrate	ADOS-2 SA CSS	ADOS-2 Module-1 or Module-2 Social Affect Calibrated Severity Score	6.76316	6.88636	0.982109	-0.0712425	0.678586	0.94041
Ornithine/Citrate	BMI	Participants body mass index	16.8433	16.6815	1.0097	0.0694839	0.673565	0.94041
Taurine/a-Ketoglutarate	MSEL RL	MSEL Receptive Language T-score	27.7292	26.8931	1.03109	0.0674689	0.681261	0.94041
↑Arginine	AgeMonths	Participants age in months	34.6071	35.0995	0.985971	-0.0618043	0.671067	0.94041
↑LacPyr↓GlyAsp	AgeMonths	Participants age in months	34.6515	35.1299	0.986382	-0.0581219	0.676221	0.94041
↑Ornithine	MSEL VR	MSEL Visual Reception T-score	32.033	31.3088	1.02313	0.0507497	0.675124	0.94041
↑Taurine	MSEL EL	MSEL Expressive Language T-score	28.6462	27.9977	1.02316	0.0584754	0.677113	0.94041
↓aKG1	MSEL DQ	MSEL Developmental Quotient (DQ)	61.6379	62.8087	0.98136	-0.0620807	0.681412	0.94041
Taurine/Phenylalanine	MSEL FM	MSEL Fine Motor T-score	27.7179	28.4696	0.973599	-0.0694628	0.682688	0.941461
Pyruvate/Homocitrulline	ADOS-2 SA CSS	ADOS-2 Module-1 or Module-2 Social Affect Calibrated Severity Score	7.04545	6.86111	1.02687	0.0972547	0.68522	0.944242
Glycine/Hexanoylcarnitine	BMI	Participants body mass index	16.8963	16.6957	1.01201	0.0878623	0.686889	0.945829
Ethanolamine/Carnitine	MSEL FM	MSEL Fine Motor T-score	29.3333	28.317	1.03589	0.0866572	0.688481	0.946597
Octanoylcarnitine/Citrate	AgeMonths	Participants age in months	35.72	35.0858	1.01807	0.0824196	0.688092	0.946597
Arg/4hyp	MSEL DQ	MSEL Developmental Quotient (DQ)	61.6364	62.8065	0.98137	-0.0697549	0.691684	0.947341
Arginine/4-hydroxyproline	MSEL DQ	MSEL Developmental Quotient (DQ)	61.6364	62.8065	0.98137	-0.0697549	0.691684	0.947341
Leu/Car	MSEL EL	MSEL Expressive Language T-score	28.9	28.0021	1.03206	0.0799657	0.692646	0.947341
Leucine/Carnitine	MSEL EL	MSEL Expressive Language T-score	28.9	28.0021	1.03206	0.0799657	0.692646	0.947341
Lys/Phe	MSEL DQ	MSEL Developmental Quotient (DQ)	64	62.5924	1.02249	0.0802833	0.69251	0.947341
Lysine/Phenylalanine	MSEL DQ	MSEL Developmental Quotient (DQ)	64	62.5924	1.02249	0.0802833	0.69251	0.947341
Serine/Leucine	ADOS-2 RRB CSS	ADOS-2 Module-1 or Module-2 Restrictive Repetitive Calibrated Severity Score	7.92857	7.7994	1.01656	0.0871463	0.691723	0.947341
Alanine/Phenylalanine	ADOS-2 RRB CSS	ADOS-2 Module-1 or Module-2 Restrictive Repetitive Calibrated Severity Score	7.9375	7.79819	1.01786	0.0892204	0.694245	0.947436
Citrate	ADOS-2 SA CSS	ADOS-2 Module-1 or Module-2 Social Affect Calibrated Severity Score	6.66667	6.88415	0.968409	-0.108115	0.694268	0.947436
Decanoylcarnitine/Leucine	ADOS-2 Comparison Score	ADOS-2 Module-1 or Module-2 Comparison Severity Score	6.94737	7.12346	0.97528	-0.0954926	0.693729	0.947436
Ornithine/Carnitine	ADOS-2 SA CSS	ADOS-2 Module-1 or Module-2 Social Affect Calibrated Severity Score	7	6.86164	1.02016	0.0781557	0.699151	0.95197
Pyruvate/Proline	MSEL VR	MSEL Visual Reception T-score	30.5806	31.4936	0.971013	-0.0694038	0.699069	0.95197
↑C10C8C6	AgeMonths	Participants age in months	35.3789	35.0556	1.00923	0.0429056	0.698368	0.95197
Citrate	MSEL EL	MSEL Expressive Language T-score	28.9231	28.0085	1.03265	0.0818724	0.704466	0.952825
Ethanolamine/a-Ketoglutarate	ADOS-2 SA CSS	ADOS-2 Module-1 or Module-2 Social Affect Calibrated Severity Score	7	6.86207	1.0201	0.0780685	0.703752	0.952825
Lactate/Kynurenine	MSEL VR	MSEL Visual Reception T-score	30.5667	31.4925	0.970601	-0.0701529	0.701567	0.952825
Lactate/Palmitoylcarnitine	ADOS-2 RRB CSS	ADOS-2 Module-1 or Module-2 Restrictive Repetitive Calibrated Severity Score	7.93548	7.77885	1.02014	0.0799552	0.701286	0.952825
Octanoylcarnitine/Leucine	MSEL RL	MSEL Receptive Language T-score	27.64	26.9335	1.02623	0.0693163	0.703178	0.952825
Octanoylcarnitine/Sarcosine	ADOS-2 SA CSS	ADOS-2 Module-1 or Module-2 Social Affect Calibrated Severity Score	7.04762	6.85714	1.02778	0.0959959	0.703961	0.952825
Phenylalanine/Citrate	MSEL RL	MSEL Receptive Language T-score	27.6809	26.9	1.02903	0.0630536	0.703612	0.952825
Pyruvate/Hexanoylcarnitine	AgeMonths	Participants age in months	35.5581	35.0759	1.01375	0.06155	0.703556	0.952825
Pyruvate/Kynurenine	ADOS-2 SA CSS	ADOS-2 Module-1 or Module-2 Social Affect Calibrated Severity Score	7	6.86032	1.02036	0.0760057	0.702937	0.952825
Lactate/Asparagine	MSEL VR	MSEL Visual Reception T-score	32.3704	31.383	1.03146	0.0738225	0.705694	0.953781
Decanoylcarnitine/Phenylalanine	ADOS-2 SA CSS	ADOS-2 Module-1 or Module-2 Social Affect Calibrated Severity Score	6.71429	6.87888	0.976072	-0.0898062	0.706507	0.954175
Homoserine/Leucine	MSEL EL	MSEL Expressive Language T-score	27.3214	28.1274	0.971346	-0.0751993	0.707791	0.9545
Pyruvate/Homocitrulline	MSEL FM	MSEL Fine Motor T-score	27.7805	28.4254	0.977311	-0.060933	0.707433	0.9545
Alanine/a-Ketoglutarate	ADOS-2 Comparison Score	ADOS-2 Module-1 or Module-2 Comparison Severity Score	7.26087	7.10526	1.0219	0.0836272	0.708324	0.954516
Lactate/Proline	ADOS-2 RRB CSS	ADOS-2 Module-1 or Module-2 Restrictive Repetitive Calibrated Severity Score	7.58824	7.80547	0.972169	-0.105947	0.71118	0.957659
↓Leucine	ADOS-2 Comparison Score	ADOS-2 Module-1 or Module-2 Comparison Severity Score	7.21053	7.1	1.01557	0.0622988	0.712893	0.95926
Glutamic Acid/4-hydroxyproline	AgeMonths	Participants age in months	35.5517	35.0128	1.01539	0.0698546	0.714771	0.960085
Pyruvate/Proline	MSEL DQ	MSEL Developmental Quotient (DQ)	61.5484	62.7468	0.980901	-0.0688575	0.714918	0.960085
↓Citrate	AgeMonths	Participants age in months	35.3125	35.0075	1.00871	0.0402611	0.71508	0.960085
Leu/Car	MSEL RL	MSEL Receptive Language T-score	27.8333	26.9186	1.03398	0.0740718	0.716432	0.960491
Leucine/Carnitine	MSEL RL	MSEL Receptive Language T-score	27.8333	26.9186	1.03398	0.0740718	0.716432	0.960491
Lactate/Homoserine	BMI	Participants body mass index	16.8036	16.6926	1.00665	0.0605097	0.718201	0.961153
Lactate/Lysine	MSEL VR	MSEL Visual Reception T-score	32.4	31.3609	1.03313	0.0755253	0.717592	0.961153
Lysine/a-Ketoglutarate	MSEL FM	MSEL Fine Motor T-score	29.1786	28.2778	1.03186	0.0766628	0.719026	0.961153
Pyruvate/Proline	MSEL EL	MSEL Expressive Language T-score	27.3548	28.103	0.973378	-0.0693681	0.718764	0.961153
Glycine/Malate	ADOS-2 RRB CSS	ADOS-2 Module-1 or Module-2 Restrictive Repetitive Calibrated Severity Score	7.90476	7.78769	1.01503	0.0734706	0.72011	0.961697
Lactate/Sarcosine	ADOS-2 RRB CSS	ADOS-2 Module-1 or Module-2 Restrictive Repetitive Calibrated Severity Score	7.53846	7.8048	0.965874	-0.121217	0.720484	0.961697
Ethanolamine/Urate	ADOS-2 Comparison Score	ADOS-2 Module-1 or Module-2 Comparison Severity Score	7.27778	7.10671	1.02407	0.0899448	0.725838	0.961752
Histidine/Leucine	ADOS-2 Comparison Score	ADOS-2 Module-1 or Module-2 Comparison Severity Score	7.25	7.10398	1.02056	0.0813722	0.724577	0.961752
Hypoxanthine/4-hydroxyproline	MSEL FM	MSEL Fine Motor T-score	27.5714	28.3007	0.974232	-0.068825	0.724254	0.961752
Lactate/Histidine	ADOS-2 SA CSS	ADOS-2 Module-1 or Module-2 Social Affect Calibrated Severity Score	7	6.8681	1.01921	0.0794449	0.726192	0.961752
Leu/Val	ADOS-2 RRB CSS	ADOS-2 Module-1 or Module-2 Restrictive Repetitive Calibrated Severity Score	7.91304	7.80556	1.01377	0.0680692	0.726038	0.961752
Leucine/Valine	ADOS-2 RRB CSS	ADOS-2 Module-1 or Module-2 Restrictive Repetitive Calibrated Severity Score	7.91304	7.80556	1.01377	0.0680692	0.726038	0.961752
Ornithine/Citrate	MSEL VR	MSEL Visual Reception T-score	30.7647	31.5135	0.97624	-0.0536197	0.723639	0.961752
Phenylalanine/Citrate	MSEL VR	MSEL Visual Reception T-score	32.234	31.3533	1.02809	0.0586426	0.725216	0.961752
Pyruvate/Palmitoylcarnitine	MSEL EL	MSEL Expressive Language T-score	28.7308	28.0194	1.02539	0.0699947	0.722619	0.961752
Serine/Leucine	BMI	Participants body mass index	16.8598	16.6913	1.0101	0.0760115	0.721788	0.961752
Serine/Urate	MSEL EL	MSEL Expressive Language T-score	28.7931	28.0107	1.02793	0.0709424	0.726307	0.961752
Glycine/Isoleucine	ADOS-2 RRB CSS	ADOS-2 Module-1 or Module-2 Restrictive Repetitive Calibrated Severity Score	7.9	7.79878	1.01298	0.0668986	0.727831	0.96284
Octanoylcarnitine/Sarcosine	MSEL FM	MSEL Fine Motor T-score	28.963	28.2457	1.02539	0.0685537	0.728185	0.96284
↓Urate	MSEL EL	MSEL Expressive Language T-score	27.4872	28.1048	0.978024	-0.0586487	0.728707	0.96284
Alanine/a-Ketoglutarate	ADOS-2 SA CSS	ADOS-2 Module-1 or Module-2 Social Affect Calibrated Severity Score	7	6.86378	1.01985	0.0753357	0.738979	0.963107
Arg/4hyp	MSEL VR	MSEL Visual Reception T-score	30.7576	31.4925	0.976664	-0.0562616	0.744807	0.963107
Arginine/4-hydroxyproline	MSEL VR	MSEL Visual Reception T-score	30.7576	31.4925	0.976664	-0.0562616	0.744807	0.963107
Decanoylcarnitine/Isoleucine	MSEL DQ	MSEL Developmental Quotient (DQ)	63.4688	62.5534	1.01463	0.0575498	0.732437	0.963107
Decanoylcarnitine/Leucine	ADOS-2 RRB CSS	ADOS-2 Module-1 or Module-2 Restrictive Repetitive Calibrated Severity Score	7.68421	7.79938	0.985233	-0.0720242	0.737628	0.963107
Ethanolamine/Citrate	MSEL EL	MSEL Expressive Language T-score	27.4483	28.094	0.977015	-0.0630891	0.738338	0.963107
Ethanolamine/a-Ketoglutarate	ADOS-2 RRB CSS	ADOS-2 Module-1 or Module-2 Restrictive Repetitive Calibrated Severity Score	7.92593	7.7837	1.01827	0.0741321	0.735697	0.963107
Glutamic Acid/4-hydroxyproline	ADOS-2 SA CSS	ADOS-2 Module-1 or Module-2 Social Affect Calibrated Severity Score	7	6.85846	1.02064	0.0789182	0.730671	0.963107
Glycine/Methionine	MSEL DQ	MSEL Developmental Quotient (DQ)	63.9032	62.6368	1.02022	0.0672765	0.73818	0.963107
Glycine/a-Ketoglutarate	MSEL VR	MSEL Visual Reception T-score	30.5833	31.5033	0.970799	-0.0624523	0.737091	0.963107
Lactate/Carnitine	BMI	Participants body mass index	16.8003	16.6915	1.00652	0.0560095	0.741285	0.963107
Lactate/Decanoylcarnitine	ADOS-2 RRB CSS	ADOS-2 Module-1 or Module-2 Restrictive Repetitive Calibrated Severity Score	8	7.78287	1.0279	0.10072	0.73869	0.963107
Lactate/Decanoylcarnitine	MSEL EL	MSEL Expressive Language T-score	27.4516	28.0978	0.977001	-0.0617688	0.740998	0.963107
Lactate/Glutamic Acid	ADOS-2 SA CSS	ADOS-2 Module-1 or Module-2 Social Affect Calibrated Severity Score	6.75758	6.88498	0.981495	-0.0665812	0.738755	0.963107
Lactate/Glutarylcarnitine	ADOS-2 RRB CSS	ADOS-2 Module-1 or Module-2 Restrictive Repetitive Calibrated Severity Score	7.61111	7.80308	0.975399	-0.0939376	0.734478	0.963107
Lactate/Serine	ADOS-2 SA CSS	ADOS-2 Module-1 or Module-2 Social Affect Calibrated Severity Score	7	6.86707	1.01936	0.0813006	0.745269	0.963107
Lactate/Taurine	ADOS-2 SA CSS	ADOS-2 Module-1 or Module-2 Social Affect Calibrated Severity Score	7	6.8642	1.01978	0.076799	0.734404	0.963107
Lysine/a-Ketoglutarate	MSEL DQ	MSEL Developmental Quotient (DQ)	63.75	62.5577	1.01906	0.0682024	0.731705	0.963107
Octanoylcarnitine/Asparagine	MSEL RL	MSEL Receptive Language T-score	27.5217	26.9124	1.02264	0.0527522	0.739828	0.963107
Ornithine/Citrate	MSEL RL	MSEL Receptive Language T-score	26.4902	27.0291	0.98006	-0.0477137	0.74627	0.963107
Ornithine/Phenylalanine	AgeMonths	Participants age in months	35.5517	35.0319	1.01484	0.0659831	0.735173	0.963107
Phenylalanine/Citrate	MSEL DQ	MSEL Developmental Quotient (DQ)	63.6596	62.5689	1.01743	0.0553875	0.745947	0.963107
Pyruvate/Aspartic Acid	MSEL EL	MSEL Expressive Language T-score	28.8966	28.0043	1.03186	0.0722742	0.741051	0.963107
Pyruvate/Kynurenine	MSEL DQ	MSEL Developmental Quotient (DQ)	61.9583	62.7483	0.98741	-0.0479289	0.740951	0.963107
Pyruvate/Octanoylcarnitine	MSEL RL	MSEL Receptive Language T-score	26.3529	27.0153	0.975481	-0.0595458	0.735138	0.963107
Taurine/Carnitine	AgeMonths	Participants age in months	34.6	35.0911	0.986005	-0.0650889	0.744788	0.963107
Taurine/a-Ketoglutarate	MSEL FM	MSEL Fine Motor T-score	28.9583	28.3096	1.02292	0.0543937	0.744524	0.963107
Xanthine/Histidine	MSEL FM	MSEL Fine Motor T-score	27.5417	28.2957	0.973351	-0.0700985	0.742452	0.963107
↑Gly↓BCAA	ADOS-2 RRB CSS	ADOS-2 Module-1 or Module-2 Restrictive Repetitive Calibrated Severity Score	7.74	7.81544	0.990348	-0.0473107	0.732002	0.963107
↓Carnitine1	AgeMonths	Participants age in months	35.3462	35.0143	1.00948	0.0423947	0.732394	0.963107
↓Carnitine2	BMI	Participants body mass index	16.7568	16.6854	1.00428	0.0361534	0.744816	0.963107
↓Urate	MSEL RL	MSEL Receptive Language T-score	27.6154	26.9192	1.02586	0.0574538	0.746276	0.963107
↓Urate	MSEL VR	MSEL Visual Reception T-score	32.2051	31.3712	1.02658	0.057919	0.74212	0.963107
Taurine/a-Ketoglutarate	MSEL EL	MSEL Expressive Language T-score	27.5625	28.1091	0.980553	-0.0506186	0.747651	0.9642
Alanine/Phenylalanine	ADOS-2 Comparison Score	ADOS-2 Module-1 or Module-2 Comparison Severity Score	7.25	7.10542	1.02035	0.0815191	0.748939	0.964878
Decanoylcarnitine/Carnitine	ADOS-2 Comparison Score	ADOS-2 Module-1 or Module-2 Comparison Severity Score	7	7.12381	0.98262	-0.0653095	0.751803	0.964878
Glycine/Leucine	MSEL FM	MSEL Fine Motor T-score	27.8667	28.4456	0.979647	-0.056952	0.751193	0.964878
Homoserine/Citrate	ADOS-2 SA CSS	ADOS-2 Module-1 or Module-2 Social Affect Calibrated Severity Score	7	6.86378	1.01985	0.0730087	0.752921	0.964878
Lactate/Citrulline	ADOS-2 SA CSS	ADOS-2 Module-1 or Module-2 Social Affect Calibrated Severity Score	7	6.86462	1.01972	0.0750971	0.749854	0.964878
Lactate/Glutamic Acid	AgeMonths	Participants age in months	35.4667	35.0265	1.01257	0.0528156	0.75107	0.964878
Lactate/Glutamine	MSEL VR	MSEL Visual Reception T-score	30.7941	31.4838	0.978094	-0.0532055	0.752548	0.964878
Taurine/Carnitine	ADOS-2 SA CSS	ADOS-2 Module-1 or Module-2 Social Affect Calibrated Severity Score	7	6.86626	1.01948	0.0785812	0.750144	0.964878
↓Leucine	MSEL FM	MSEL Fine Motor T-score	28.0469	28.4644	0.985333	-0.0406527	0.751955	0.964878
Ethanolamine/Urate	MSEL FM	MSEL Fine Motor T-score	29.2	28.3284	1.03077	0.0715488	0.755702	0.967764
Arginine/Citrate	MSEL FM	MSEL Fine Motor T-score	27.7419	28.4323	0.97572	-0.061026	0.756322	0.96788
Decanoylcarnitine/Isoleucine	ADOS-2 Comparison Score	ADOS-2 Module-1 or Module-2 Comparison Severity Score	7.21739	7.10625	1.01564	0.0612435	0.778255	0.968539
Ethanolamine/Citrate	BMI	Participants body mass index	16.6163	16.7043	0.994734	-0.0480991	0.764751	0.968539
Glycine/Arginine	BMI	Participants body mass index	16.8054	16.6953	1.00659	0.0511251	0.779982	0.968539
Glycine/Citrate	BMI	Participants body mass index	16.7833	16.6892	1.00564	0.0453885	0.765153	0.968539
Glycine/Citrate	MSEL VR	MSEL Visual Reception T-score	30.78	31.5101	0.976831	-0.0493183	0.758667	0.968539
Glycine/Isoleucine	MSEL EL	MSEL Expressive Language T-score	27.6316	28.1193	0.982655	-0.0480009	0.770185	0.968539
Glycine/Lysine	AgeMonths	Participants age in months	35.4231	35.0191	1.01154	0.0544763	0.777412	0.968539
Homoserine/Leucine	MSEL FM	MSEL Fine Motor T-score	27.9286	28.4395	0.982035	-0.0522869	0.766318	0.968539
Lactate/Asparagine	ADOS-2 RRB CSS	ADOS-2 Module-1 or Module-2 Restrictive Repetitive Calibrated Severity Score	7.6	7.80363	0.973906	-0.0945332	0.761988	0.968539
Lactate/Glutamic Acid	MSEL RL	MSEL Receptive Language T-score	26.4667	27.0243	0.979364	-0.0462329	0.780124	0.968539
Lactate/Lysine	MSEL DQ	MSEL Developmental Quotient (DQ)	61.8	62.6688	0.986137	-0.0544798	0.77298	0.968539
Lactate/Methionine	MSEL EL	MSEL Expressive Language T-score	27.4667	28.0942	0.977663	-0.0584942	0.763816	0.968539
Lactate/Methionine	MSEL VR	MSEL Visual Reception T-score	30.7667	31.4797	0.977351	-0.0544136	0.764262	0.968539
Lactate/Ornithine	ADOS-2 SA CSS	ADOS-2 Module-1 or Module-2 Social Affect Calibrated Severity Score	6.75	6.87879	0.981278	-0.073395	0.779622	0.968539
Lactate/Proline	MSEL FM	MSEL Fine Motor T-score	28.9643	28.3369	1.02214	0.058122	0.769269	0.968539
Lactate/Threonine	ADOS-2 RRB CSS	ADOS-2 Module-1 or Module-2 Restrictive Repetitive Calibrated Severity Score	7.66667	7.80308	0.982518	-0.0706137	0.776344	0.968539
Lactate/a-Ketoglutarate	MSEL VR	MSEL Visual Reception T-score	32.2333	31.3854	1.02702	0.0579194	0.774096	0.968539
Leu/Car	MSEL DQ	MSEL Developmental Quotient (DQ)	63.6667	62.6081	1.01691	0.0587199	0.766358	0.968539
Leucine/Carnitine	MSEL DQ	MSEL Developmental Quotient (DQ)	63.6667	62.6081	1.01691	0.0587199	0.766358	0.968539
Lys/Gln	MSEL FM	MSEL Fine Motor T-score	27.68	28.4038	0.974517	-0.0637961	0.771054	0.968539
Lys/Phe	ADOS-2 Comparison Score	ADOS-2 Module-1 or Module-2 Comparison Severity Score	7.2	7.09786	1.01439	0.0621775	0.764339	0.968539
Lys/Phe	MSEL FM	MSEL Fine Motor T-score	27.7407	28.4034	0.97667	-0.0604604	0.768239	0.968539
Lysine/Glutamine	MSEL FM	MSEL Fine Motor T-score	27.68	28.4038	0.974517	-0.0637961	0.771054	0.968539
Lysine/Phenylalanine	ADOS-2 Comparison Score	ADOS-2 Module-1 or Module-2 Comparison Severity Score	7.2	7.09786	1.01439	0.0621775	0.764339	0.968539
Lysine/Phenylalanine	MSEL FM	MSEL Fine Motor T-score	27.7407	28.4034	0.97667	-0.0604604	0.768239	0.968539
Malate/Homoserine	BMI	Participants body mass index	16.6127	16.7039	0.99454	-0.0502628	0.763468	0.968539
Octanoylcarnitine/Carnitine	AgeMonths	Participants age in months	35.5172	35.0931	1.01209	0.0545277	0.777678	0.968539
Pyruvate/Hexanoylcarnitine	ADOS-2 RRB CSS	ADOS-2 Module-1 or Module-2 Restrictive Repetitive Calibrated Severity Score	7.67857	7.80317	0.984032	-0.0654796	0.759655	0.968539
Pyruvate/Homoserine	MSEL FM	MSEL Fine Motor T-score	27.8889	28.41	0.981658	-0.0495961	0.771895	0.968539
Pyruvate/Octanoylcarnitine	MSEL VR	MSEL Visual Reception T-score	30.7353	31.4398	0.977591	-0.0517986	0.771858	0.968539
Pyruvate/a-Ketoglutarate	MSEL DQ	MSEL Developmental Quotient (DQ)	61.8537	62.7456	0.985785	-0.0490067	0.775693	0.968539
Serine/Isoleucine	ADOS-2 RRB CSS	ADOS-2 Module-1 or Module-2 Restrictive Repetitive Calibrated Severity Score	7.90909	7.80119	1.01383	0.0730204	0.766949	0.968539
Taurine/Carnitine	MSEL FM	MSEL Fine Motor T-score	27.8	28.4025	0.978786	-0.0576642	0.775709	0.968539
Taurine/Palmitoylcarnitine	MSEL RL	MSEL Receptive Language T-score	27.5484	26.9304	1.02295	0.0544898	0.771388	0.968539
Tryptophan/a-Ketoglutarate	MSEL RL	MSEL Receptive Language T-score	27.5111	26.9204	1.02194	0.0490142	0.767139	0.968539
Xanthine/4-hydroxyproline	BMI	Participants body mass index	16.6134	16.6952	0.995101	-0.0455137	0.777773	0.968539
a-Ketoglutarate/Valine	ADOS-2 RRB CSS	ADOS-2 Module-1 or Module-2 Restrictive Repetitive Calibrated Severity Score	7.90909	7.79567	1.01455	0.0638378	0.779465	0.968539
a-Ketoglutarate/Valine	ADOS-2 SA CSS	ADOS-2 Module-1 or Module-2 Social Affect Calibrated Severity Score	7	6.87307	1.01847	0.0680948	0.774032	0.968539
aKG/Val	ADOS-2 RRB CSS	ADOS-2 Module-1 or Module-2 Restrictive Repetitive Calibrated Severity Score	7.90909	7.79567	1.01455	0.0638378	0.779465	0.968539
aKG/Val	ADOS-2 SA CSS	ADOS-2 Module-1 or Module-2 Social Affect Calibrated Severity Score	7	6.87307	1.01847	0.0680948	0.774032	0.968539
↑Alanine	MSEL EL	MSEL Expressive Language T-score	27.7231	28.1359	0.985326	-0.0387199	0.77534	0.968539
↑Ethanolamine	MSEL DQ	MSEL Developmental Quotient (DQ)	63.3485	62.5684	1.01247	0.042878	0.757777	0.968539
↑LacPyr↓(C6-C16)	MSEL DQ	MSEL Developmental Quotient (DQ)	62.1222	62.7232	0.990419	-0.034206	0.774628	0.968539
↓Urate	MSEL FM	MSEL Fine Motor T-score	28.9231	28.3253	1.0211	0.0509256	0.779092	0.968539
Decanoylcarnitine/Carnitine	ADOS-2 RRB CSS	ADOS-2 Module-1 or Module-2 Restrictive Repetitive Calibrated Severity Score	7.71429	7.8	0.989011	-0.0518323	0.781688	0.969526
Lactate/Aspartic Acid	MSEL RL	MSEL Receptive Language T-score	26.5128	27.0131	0.98148	-0.0449283	0.78432	0.969526
Lactate/Urate	MSEL VR	MSEL Visual Reception T-score	30.9394	31.472	0.983077	-0.0434737	0.782951	0.969526
Lactate/a-Ketoglutarate	ADOS-2 RRB CSS	ADOS-2 Module-1 or Module-2 Restrictive Repetitive Calibrated Severity Score	7.65	7.80368	0.980307	-0.0733591	0.783619	0.969526
Pyruvate/Carnitine	ADOS-2 SA CSS	ADOS-2 Module-1 or Module-2 Social Affect Calibrated Severity Score	6.75	6.88037	0.981052	-0.0689094	0.783311	0.969526
Taurine/a-Ketoglutarate	ADOS-2 RRB CSS	ADOS-2 Module-1 or Module-2 Restrictive Repetitive Calibrated Severity Score	7.88889	7.78387	1.01349	0.0536558	0.783152	0.969526
Xanthine/4-hydroxyproline	AgeMonths	Participants age in months	34.72	35.1674	0.987277	-0.0572976	0.784627	0.969526
Arginine/Leucine	MSEL FM	MSEL Fine Motor T-score	27.9118	28.4655	0.980547	-0.0498695	0.787869	0.969901
Eta/Kyn	MSEL DQ	MSEL Developmental Quotient (DQ)	61.9167	62.7775	0.986287	-0.0483606	0.787292	0.969901
Ethanolamine/Kynurenine	MSEL DQ	MSEL Developmental Quotient (DQ)	61.9167	62.7775	0.986287	-0.0483606	0.787292	0.969901
Glycine/Lysine	BMI	Participants body mass index	16.5601	16.7122	0.990897	-0.0632072	0.788111	0.969901
Lactate/Glutamic Acid	MSEL EL	MSEL Expressive Language T-score	27.6	28.1018	0.982145	-0.0450705	0.78619	0.969901
Methionine/Carnitine	ADOS-2 RRB CSS	ADOS-2 Module-1 or Module-2 Restrictive Repetitive Calibrated Severity Score	7.7	7.80061	0.987102	-0.0601857	0.787699	0.969901
Ethanolamine/4-hydroxyproline	ADOS-2 Comparison Score	ADOS-2 Module-1 or Module-2 Comparison Severity Score	7.21739	7.1142	1.01451	0.0574924	0.790859	0.970672
Lactate/Homocitrulline	ADOS-2 SA CSS	ADOS-2 Module-1 or Module-2 Social Affect Calibrated Severity Score	6.96154	6.86562	1.01397	0.0549008	0.790408	0.970672
Lactate/Proline	ADOS-2 Comparison Score	ADOS-2 Module-1 or Module-2 Comparison Severity Score	7	7.12158	0.982928	-0.0672026	0.789482	0.970672
Serine/Urate	BMI	Participants body mass index	16.624	16.7034	0.995246	-0.0437333	0.789892	0.970672
Lactate/Glycine	ADOS-2 Comparison Score	ADOS-2 Module-1 or Module-2 Comparison Severity Score	7.23529	7.10942	1.0177	0.0680295	0.791434	0.970726
Arg/4hyp	BMI	Participants body mass index	16.642	16.7083	0.996033	-0.0369348	0.796099	0.97224
Arginine/4-hydroxyproline	BMI	Participants body mass index	16.642	16.7083	0.996033	-0.0369348	0.796099	0.97224
Citrate	ADOS-2 Comparison Score	ADOS-2 Module-1 or Module-2 Comparison Severity Score	7	7.12195	0.982877	-0.0655488	0.794296	0.97224
Decanoylcarnitine/4-hydroxyproline	MSEL DQ	MSEL Developmental Quotient (DQ)	61.9375	62.6747	0.988238	-0.0443375	0.803063	0.97224
Ethanolamine/4-hydroxyproline	ADOS-2 SA CSS	ADOS-2 Module-1 or Module-2 Social Affect Calibrated Severity Score	6.78261	6.87346	0.986783	-0.0530736	0.804376	0.97224
Glycine/Arginine	AgeMonths	Participants age in months	34.7429	35.067	0.990758	-0.0425974	0.804534	0.97224
Glycine/Lysine	MSEL RL	MSEL Receptive Language T-score	26.4231	27.0233	0.977788	-0.0521721	0.799389	0.97224
Lactate/Alanine	ADOS-2 RRB CSS	ADOS-2 Module-1 or Module-2 Restrictive Repetitive Calibrated Severity Score	7.64706	7.80243	0.980087	-0.0723334	0.804887	0.97224
Lactate/Asparagine	ADOS-2 Comparison Score	ADOS-2 Module-1 or Module-2 Comparison Severity Score	7	7.12085	0.983029	-0.0666237	0.803992	0.97224
Lactate/Glutarylcarnitine	ADOS-2 Comparison Score	ADOS-2 Module-1 or Module-2 Comparison Severity Score	7.22222	7.10769	1.01611	0.0627059	0.79908	0.97224
Lactate/Malate	MSEL FM	MSEL Fine Motor T-score	27.9524	28.411	0.983858	-0.0420036	0.799583	0.97224
Leucine	ADOS-2 Comparison Score	ADOS-2 Module-1 or Module-2 Comparison Severity Score	7.21053	7.10638	1.01465	0.0599289	0.793218	0.97224
Octanoylcarnitine/Carnitine	ADOS-2 Comparison Score	ADOS-2 Module-1 or Module-2 Comparison Severity Score	7	7.12074	0.983043	-0.0633118	0.794815	0.97224
Pyruvate/Homocitrulline	ADOS-2 Comparison Score	ADOS-2 Module-1 or Module-2 Comparison Severity Score	7.22727	7.10802	1.01678	0.0601328	0.802324	0.97224
Pyruvate/Homocitrulline	ADOS-2 RRB CSS	ADOS-2 Module-1 or Module-2 Restrictive Repetitive Calibrated Severity Score	7.68182	7.80247	0.984537	-0.0618199	0.800541	0.97224
Pyruvate/Proline	ADOS-2 RRB CSS	ADOS-2 Module-1 or Module-2 Restrictive Repetitive Calibrated Severity Score	7.66667	7.80183	0.982676	-0.069146	0.797836	0.97224
Pyruvate/Sarcosine	ADOS-2 RRB CSS	ADOS-2 Module-1 or Module-2 Restrictive Repetitive Calibrated Severity Score	7.68182	7.80247	0.984537	-0.0611097	0.804217	0.97224
Taurine/4-hydroxyproline	ADOS-2 SA CSS	ADOS-2 Module-1 or Module-2 Social Affect Calibrated Severity Score	6.7931	6.87421	0.988201	-0.0476376	0.803066	0.97224
Taurine/Carnitine	ADOS-2 Comparison Score	ADOS-2 Module-1 or Module-2 Comparison Severity Score	7.23529	7.10942	1.0177	0.0663238	0.800951	0.97224
Tryptophan/a-Ketoglutarate	ADOS-2 SA CSS	ADOS-2 Module-1 or Module-2 Social Affect Calibrated Severity Score	6.79412	6.88141	0.987315	-0.0484912	0.796061	0.97224
gamma-Aminobutyric Acid/Hexanoylcarnitine	MSEL FM	MSEL Fine Motor T-score	28.88	28.2532	1.02218	0.0551368	0.802534	0.97224
↑LacPyr↓GlyAsp	MSEL EL	MSEL Expressive Language T-score	27.7121	28.109	0.985879	-0.0358733	0.797109	0.97224
↓Glutamine	AgeMonths	Participants age in months	35.3415	35.0371	1.00869	0.0401262	0.801081	0.97224
Pyruvate/Octanoylcarnitine	MSEL EL	MSEL Expressive Language T-score	28.4706	28.0263	1.01585	0.0431479	0.806228	0.973217
Glycine/Leucine	MSEL EL	MSEL Expressive Language T-score	28.5333	28.0533	1.01711	0.0461005	0.806891	0.973375
Hexanoylcarnitine/Leucine	MSEL VR	MSEL Visual Reception T-score	30.8857	31.4298	0.982688	-0.041298	0.808339	0.973604
Phenylalanine/Citrate	MSEL EL	MSEL Expressive Language T-score	27.7021	28.0933	0.986075	-0.0373581	0.808676	0.973604
↑Glycine	MSEL RL	MSEL Receptive Language T-score	27.3667	26.9636	1.01495	0.0344455	0.807913	0.973604
Lactate/Sarcosine	MSEL EL	MSEL Expressive Language T-score	28.56	28.0297	1.01892	0.0502109	0.810489	0.974081
Pyruvate/Homocitrulline	BMI	Participants body mass index	16.7597	16.6935	1.00397	0.0353362	0.810669	0.974081
Serine/Urate	AgeMonths	Participants age in months	34.6897	35.0897	0.988598	-0.04862	0.810174	0.974081
Arginine/Phenylalanine	MSEL VR	MSEL Visual Reception T-score	30.8966	31.4776	0.981541	-0.0437431	0.815402	0.974602
Glycine/Malate	MSEL EL	MSEL Expressive Language T-score	28.5862	28.0235	1.02008	0.0488978	0.815159	0.974602
Homoserine/Isoleucine	MSEL RL	MSEL Receptive Language T-score	26.5625	27.0428	0.982238	-0.042262	0.817991	0.974602
Lactate/Glutamine	ADOS-2 RRB CSS	ADOS-2 Module-1 or Module-2 Restrictive Repetitive Calibrated Severity Score	7.66667	7.80183	0.982676	-0.0650083	0.816389	0.974602
Lactate/Kynurenine	MSEL DQ	MSEL Developmental Quotient (DQ)	62	62.7152	0.988596	-0.0425097	0.818011	0.974602
Lactate/Methionine	MSEL FM	MSEL Fine Motor T-score	27.9333	28.4004	0.983553	-0.0436902	0.817985	0.974602
Malate/4-hydroxyproline	BMI	Participants body mass index	16.7697	16.6973	1.00434	0.0391781	0.814153	0.974602
Octanoylcarnitine/4-hydroxyproline	ADOS-2 RRB CSS	ADOS-2 Module-1 or Module-2 Restrictive Repetitive Calibrated Severity Score	7.73684	7.81734	0.989703	-0.050591	0.818027	0.974602
Octanoylcarnitine/4-hydroxyproline	MSEL DQ	MSEL Developmental Quotient (DQ)	61.88	62.6667	0.987447	-0.0469283	0.816256	0.974602
Octanoylcarnitine/Isoleucine	AgeMonths	Participants age in months	34.76	35.1373	0.989261	-0.0485745	0.814558	0.974602
Phenylalanine/Citrate	ADOS-2 SA CSS	ADOS-2 Module-1 or Module-2 Social Affect Calibrated Severity Score	6.94118	6.86538	1.01104	0.042794	0.816927	0.974602
Serine/Citrate	AgeMonths	Participants age in months	35.3333	35.0437	1.00827	0.0380653	0.815739	0.974602
↓aKG2	ADOS-2 Comparison Score	ADOS-2 Module-1 or Module-2 Comparison Severity Score	7.17778	7.10631	1.01006	0.0382846	0.816391	0.974602
Decanoylcarnitine/Leucine	AgeMonths	Participants age in months	35.4615	35.0989	1.01033	0.0464052	0.82039	0.975227
Hexanoylcarnitine/Leucine	MSEL FM	MSEL Fine Motor T-score	27.9714	28.3092	0.988068	-0.0352556	0.820683	0.975227
Taurine/Carnitine	BMI	Participants body mass index	16.7763	16.6944	1.00491	0.0423688	0.820529	0.975227
↑Glycine	MSEL DQ	MSEL Developmental Quotient (DQ)	63.2333	62.6446	1.0094	0.0327176	0.819594	0.975227
Arginine/Citrate	MSEL VR	MSEL Visual Reception T-score	30.9355	31.4731	0.982918	-0.0405776	0.822325	0.976158
Homoserine/Isoleucine	MSEL VR	MSEL Visual Reception T-score	31.9375	31.4069	1.0169	0.0400376	0.822534	0.976158
Citrulline/Glutarylcarnitine	BMI	Participants body mass index	16.7713	16.7001	1.00426	0.0341121	0.826313	0.97624
Ethanolamine/Citrate	MSEL VR	MSEL Visual Reception T-score	30.8966	31.4701	0.981775	-0.0424111	0.824228	0.97624
Lactate/Asparagine	MSEL DQ	MSEL Developmental Quotient (DQ)	62	62.7106	0.988668	-0.0427431	0.82355	0.97624
Lactate/Malate	MSEL EL	MSEL Expressive Language T-score	27.6905	28.0901	0.985773	-0.0366272	0.828077	0.97624
Lactate/Serine	ADOS-2 RRB CSS	ADOS-2 Module-1 or Module-2 Restrictive Repetitive Calibrated Severity Score	7.93333	7.78852	1.01859	0.0678972	0.826826	0.97624
Malate/Carnitine	ADOS-2 SA CSS	ADOS-2 Module-1 or Module-2 Social Affect Calibrated Severity Score	6.93939	6.86581	1.01072	0.0414247	0.825492	0.97624
Octanoylcarnitine/Asparagine	ADOS-2 SA CSS	ADOS-2 Module-1 or Module-2 Social Affect Calibrated Severity Score	6.80556	6.87622	0.989723	-0.0394342	0.828198	0.97624
Ornithine/Citrate	MSEL FM	MSEL Fine Motor T-score	28	28.4148	0.985402	-0.0352621	0.826459	0.97624
Taurine/Malate	ADOS-2 Comparison Score	ADOS-2 Module-1 or Module-2 Comparison Severity Score	7.20833	7.1087	1.01402	0.0501726	0.827787	0.97624
Xanthine/Carnitine	BMI	Participants body mass index	16.6229	16.6918	0.995872	-0.0372624	0.824841	0.97624
↑TauXan↓C16	MSEL EL	MSEL Expressive Language T-score	28.3469	28.0249	1.01149	0.0316631	0.829004	0.97624
↓Citrate	MSEL RL	MSEL Receptive Language T-score	26.7396	27.0299	0.989259	-0.0250451	0.828991	0.97624
Lactate/Glutamic Acid	MSEL VR	MSEL Visual Reception T-score	31.0444	31.4757	0.9863	-0.0326289	0.829572	0.976281
↓Urate	MSEL DQ	MSEL Developmental Quotient (DQ)	63.3333	62.6157	1.01146	0.0383795	0.830897	0.977212
Alanine/Carnitine	AgeMonths	Participants age in months	35.3429	35.0455	1.00849	0.0367285	0.840597	0.979083
Alanine/Valine	ADOS-2 RRB CSS	ADOS-2 Module-1 or Module-2 Restrictive Repetitive Calibrated Severity Score	7.75	7.81571	0.991593	-0.0415869	0.85754	0.979083
Citrulline/Carnitine	ADOS-2 SA CSS	ADOS-2 Module-1 or Module-2 Social Affect Calibrated Severity Score	6.94737	6.8685	1.01148	0.0427209	0.865348	0.979083
Decanoylcarnitine/Carnitine	MSEL DQ	MSEL Developmental Quotient (DQ)	62.0833	62.6549	0.990877	-0.0333344	0.848062	0.979083
Decanoylcarnitine/Carnitine	MSEL FM	MSEL Fine Motor T-score	27.9444	28.3121	0.987015	-0.0343206	0.845433	0.979083
Decanoylcarnitine/Leucine	MSEL EL	MSEL Expressive Language T-score	28.4231	28.0366	1.01379	0.0386214	0.841785	0.979083
Decanoylcarnitine/Phenylalanine	ADOS-2 RRB CSS	ADOS-2 Module-1 or Module-2 Restrictive Repetitive Calibrated Severity Score	7.85714	7.78882	1.00877	0.0411338	0.848574	0.979083
Ethanolamine/Carnitine	ADOS-2 SA CSS	ADOS-2 Module-1 or Module-2 Social Affect Calibrated Severity Score	6.78947	6.87768	0.987176	-0.04888	0.843265	0.979083
Ethanolamine/Urate	AgeMonths	Participants age in months	34.76	35.0826	0.990804	-0.0377204	0.866195	0.979083
Ethanolamine/a-Ketoglutarate	MSEL VR	MSEL Visual Reception T-score	31.0769	31.4672	0.987596	-0.0285486	0.86497	0.979083
Glycine/Citrate	MSEL RL	MSEL Receptive Language T-score	27.28	26.9396	1.01264	0.0282544	0.857812	0.979083
Glycine/Valine	ADOS-2 SA CSS	ADOS-2 Module-1 or Module-2 Social Affect Calibrated Severity Score	6.94737	6.86585	1.01187	0.0467973	0.845199	0.979083
Homoserine/Isoleucine	ADOS-2 RRB CSS	ADOS-2 Module-1 or Module-2 Restrictive Repetitive Calibrated Severity Score	7.73684	7.80851	0.990822	-0.0445775	0.837764	0.979083
Lactate/Alanine	MSEL VR	MSEL Visual Reception T-score	31.0303	31.4655	0.986169	-0.0335492	0.844668	0.979083
Lactate/Carnitine	AgeMonths	Participants age in months	34.8182	35.0841	0.992422	-0.0325024	0.86372	0.979083
Lactate/Glutamic Acid	MSEL DQ	MSEL Developmental Quotient (DQ)	62.2	62.719	0.991725	-0.0306027	0.842675	0.979083
Lactate/Glutarylcarnitine	MSEL EL	MSEL Expressive Language T-score	27.7241	28.0779	0.9874	-0.0334773	0.863487	0.979083
Lactate/Kynurenine	ADOS-2 RRB CSS	ADOS-2 Module-1 or Module-2 Restrictive Repetitive Calibrated Severity Score	7.88889	7.78963	1.01274	0.0474654	0.865731	0.979083
Lactate/Kynurenine	BMI	Participants body mass index	16.7625	16.6949	1.00405	0.0346935	0.848939	0.979083
Lactate/Leucine	MSEL FM	MSEL Fine Motor T-score	28.1	28.3897	0.989795	-0.0300993	0.856237	0.979083
Lactate/Methionine	BMI	Participants body mass index	16.6408	16.7027	0.996292	-0.0336814	0.8357	0.979083
Lactate/Ornithine	BMI	Participants body mass index	16.6504	16.7022	0.996898	-0.0284759	0.855514	0.979083
Lactate/Sarcosine	MSEL DQ	MSEL Developmental Quotient (DQ)	62.12	62.7013	0.99073	-0.0370153	0.840833	0.979083
Lactate/Serine	BMI	Participants body mass index	16.7499	16.6958	1.00324	0.029147	0.864648	0.979083
Lactate/Threonine	MSEL FM	MSEL Fine Motor T-score	28.0588	28.3952	0.988152	-0.0315942	0.859236	0.979083
Lactate/Tyrosine	ADOS-2 RRB CSS	ADOS-2 Module-1 or Module-2 Restrictive Repetitive Calibrated Severity Score	7.88889	7.78963	1.01274	0.0474654	0.865731	0.979083
Lactate/Urate	ADOS-2 RRB CSS	ADOS-2 Module-1 or Module-2 Restrictive Repetitive Calibrated Severity Score	7.68421	7.80122	0.985001	-0.0559108	0.838077	0.979083
Lactate/Valine	ADOS-2 RRB CSS	ADOS-2 Module-1 or Module-2 Restrictive Repetitive Calibrated Severity Score	7.92857	7.79758	1.0168	0.0599385	0.853801	0.979083
Leu/Car	AgeMonths	Participants age in months	35.3	35.0514	1.00709	0.032487	0.861304	0.979083
Leu/Car	BMI	Participants body mass index	16.7588	16.6951	1.00381	0.0319939	0.864235	0.979083
Leucine/Carnitine	AgeMonths	Participants age in months	35.3	35.0514	1.00709	0.032487	0.861304	0.979083
Leucine/Carnitine	BMI	Participants body mass index	16.7588	16.6951	1.00381	0.0319939	0.864235	0.979083
Lys/Gln	MSEL VR	MSEL Visual Reception T-score	31	31.4397	0.986013	-0.034191	0.859899	0.979083
Lysine/Glutamine	MSEL VR	MSEL Visual Reception T-score	31	31.4397	0.986013	-0.034191	0.859899	0.979083
Malate/Homoserine	ADOS-2 Comparison Score	ADOS-2 Module-1 or Module-2 Comparison Severity Score	7.2	7.11178	1.0124	0.0501146	0.847086	0.979083
Methionine/Carnitine	ADOS-2 Comparison Score	ADOS-2 Module-1 or Module-2 Comparison Severity Score	7.2	7.11043	1.0126	0.0468434	0.848032	0.979083
Octanoylcarnitine/4-hydroxyproline	MSEL RL	MSEL Receptive Language T-score	26.52	27	0.982222	-0.039224	0.85959	0.979083
Octanoylcarnitine/4-hydroxyproline	MSEL VR	MSEL Visual Reception T-score	31.88	31.3677	1.01633	0.0367319	0.862238	0.979083
Octanoylcarnitine/Asparagine	ADOS-2 Comparison Score	ADOS-2 Module-1 or Module-2 Comparison Severity Score	7.05556	7.12052	0.990876	-0.035555	0.841543	0.979083
Octanoylcarnitine/Asparagine	MSEL VR	MSEL Visual Reception T-score	31.7174	31.3573	1.01148	0.0272757	0.856065	0.979083
Octanoylcarnitine/Leucine	ADOS-2 SA CSS	ADOS-2 Module-1 or Module-2 Social Affect Calibrated Severity Score	6.77778	6.87385	0.986024	-0.0519641	0.840672	0.979083
Octanoylcarnitine/Sarcosine	MSEL DQ	MSEL Developmental Quotient (DQ)	63.1852	62.5797	1.00967	0.0364098	0.85035	0.979083
Ornithine/Phenylalanine	BMI	Participants body mass index	16.7908	16.6954	1.00571	0.0413204	0.850979	0.979083
Pyruvate/4-hydroxyproline	ADOS-2 Comparison Score	ADOS-2 Module-1 or Module-2 Comparison Severity Score	7.18519	7.1195	1.00923	0.0354535	0.863832	0.979083
Pyruvate/Aspartic Acid	AgeMonths	Participants age in months	35.3793	35.047	1.00948	0.0394323	0.848334	0.979083
Pyruvate/Octanoylcarnitine	ADOS-2 Comparison Score	ADOS-2 Module-1 or Module-2 Comparison Severity Score	7.19048	7.1087	1.0115	0.0447683	0.844713	0.979083
Pyruvate/Phenylalanine	ADOS-2 RRB CSS	ADOS-2 Module-1 or Module-2 Restrictive Repetitive Calibrated Severity Score	7.6875	7.8	0.985577	-0.0546648	0.852946	0.979083
Pyruvate/Phenylalanine	MSEL FM	MSEL Fine Motor T-score	28.0312	28.3957	0.987165	-0.0337601	0.855843	0.979083
Pyruvate/Sarcosine	ADOS-2 SA CSS	ADOS-2 Module-1 or Module-2 Social Affect Calibrated Severity Score	6.95455	6.86728	1.01271	0.0451991	0.852242	0.979083
Pyruvate/Sarcosine	MSEL RL	MSEL Receptive Language T-score	27.3529	26.946	1.0151	0.0346867	0.850643	0.979083
Taurine/Carnitine	MSEL RL	MSEL Receptive Language T-score	26.56	26.9958	0.983858	-0.0386424	0.850812	0.979083
Taurine/Palmitoylcarnitine	BMI	Participants body mass index	16.7884	16.7015	1.00521	0.0381073	0.851312	0.979083
Tryptophan/a-Ketoglutarate	ADOS-2 Comparison Score	ADOS-2 Module-1 or Module-2 Comparison Severity Score	7.05882	7.12179	0.991158	-0.0332765	0.860163	0.979083
Tryptophan/a-Ketoglutarate	BMI	Participants body mass index	16.7488	16.6938	1.0033	0.02919	0.835495	0.979083
↑C10C8C6	ADOS-2 SA CSS	ADOS-2 Module-1 or Module-2 Social Affect Calibrated Severity Score	6.82857	6.87912	0.992652	-0.02799	0.840017	0.979083
↑Ethanolamine	BMI	Participants body mass index	16.7307	16.6936	1.00223	0.0199749	0.860049	0.979083
↑Glycine	MSEL VR	MSEL Visual Reception T-score	31.1167	31.4852	0.988295	-0.0262446	0.853284	0.979083
↑LacPyr↓GlyAsp	ADOS-2 Comparison Score	ADOS-2 Module-1 or Module-2 Comparison Severity Score	7.06667	7.12292	0.992102	-0.0302115	0.854283	0.979083
↑LacPyr↓GlyAsp	ADOS-2 RRB CSS	ADOS-2 Module-1 or Module-2 Restrictive Repetitive Calibrated Severity Score	7.84444	7.78738	1.00733	0.0310348	0.854139	0.979083
↑TauXan↓C16	MSEL RL	MSEL Receptive Language T-score	26.6735	27.0023	0.987823	-0.0299162	0.838394	0.979083
↑TauXan↓C16	MSEL VR	MSEL Visual Reception T-score	31.7143	31.3552	1.01145	0.0261544	0.863648	0.979083
↓C5DC	BMI	Participants body mass index	16.75	16.7008	1.00294	0.0241115	0.857654	0.979083
↓aKG1	ADOS-2 RRB CSS	ADOS-2 Module-1 or Module-2 Restrictive Repetitive Calibrated Severity Score	7.7561	7.8	0.994371	-0.026801	0.863759	0.979083
Decanoylcarnitine/Isoleucine	MSEL EL	MSEL Expressive Language T-score	27.7812	28.0763	0.989493	-0.0293556	0.867565	0.979423
Pyruvate/Octanoylcarnitine	BMI	Participants body mass index	16.6384	16.712	0.995597	-0.0334965	0.867172	0.979423
Pyruvate/Hexanoylcarnitine	MSEL FM	MSEL Fine Motor T-score	28.5814	28.2567	1.01149	0.0281989	0.869979	0.981542
Octanoylcarnitine/Leucine	AgeMonths	Participants age in months	35.36	35.1052	1.00726	0.0331819	0.871181	0.982293
Lactate/Ornithine	ADOS-2 Comparison Score	ADOS-2 Module-1 or Module-2 Comparison Severity Score	7.1875	7.11212	1.0106	0.0417274	0.871888	0.982485
Alanine/Valine	ADOS-2 Comparison Score	ADOS-2 Module-1 or Module-2 Comparison Severity Score	7.1875	7.11782	1.00979	0.037586	0.887858	0.984298
Alanine/Valine	ADOS-2 SA CSS	ADOS-2 Module-1 or Module-2 Social Affect Calibrated Severity Score	6.9375	6.86707	1.01026	0.0389972	0.884956	0.984298
Arginine/Citrate	ADOS-2 Comparison Score	ADOS-2 Module-1 or Module-2 Comparison Severity Score	7.16667	7.1215	1.00634	0.0264689	0.894648	0.984298
Arginine/Leucine	AgeMonths	Participants age in months	34.8235	35.0603	0.993245	-0.0291999	0.875	0.984298
Decanoylcarnitine/Carnitine	MSEL EL	MSEL Expressive Language T-score	27.8333	28.0747	0.991402	-0.0222719	0.901467	0.984298
Decanoylcarnitine/Isoleucine	MSEL RL	MSEL Receptive Language T-score	26.75	26.9847	0.991301	-0.0227989	0.889438	0.984298
Decanoylcarnitine/Leucine	MSEL DQ	MSEL Developmental Quotient (DQ)	62.9231	62.5957	1.00523	0.0217286	0.898442	0.984298
Decanoylcarnitine/Phenylalanine	ADOS-2 Comparison Score	ADOS-2 Module-1 or Module-2 Comparison Severity Score	7.04762	7.11801	0.990111	-0.0368024	0.87723	0.984298
Decanoylcarnitine/Valine	MSEL DQ	MSEL Developmental Quotient (DQ)	62.9091	62.5821	1.00523	0.0215148	0.888988	0.984298
Ethanolamine/Citrate	ADOS-2 RRB CSS	ADOS-2 Module-1 or Module-2 Restrictive Repetitive Calibrated Severity Score	7.73913	7.79876	0.992354	-0.0317368	0.891705	0.984298
Glycine/Leucine	BMI	Participants body mass index	16.7696	16.6965	1.00437	0.0306835	0.889375	0.984298
Glycine/Methionine	MSEL VR	MSEL Visual Reception T-score	31.0968	31.4637	0.988339	-0.0250181	0.89996	0.984298
Hypoxanthine/Carnitine	MSEL FM	MSEL Fine Motor T-score	28.56	28.2212	1.012	0.0294132	0.894415	0.984298
Lactate/Alanine	MSEL FM	MSEL Fine Motor T-score	28.1515	28.3879	0.991672	-0.0246578	0.875805	0.984298
Lactate/Glutamine	ADOS-2 Comparison Score	ADOS-2 Module-1 or Module-2 Comparison Severity Score	7.05556	7.1189	0.991102	-0.0347627	0.887775	0.984298
Lactate/Glutamine	MSEL FM	MSEL Fine Motor T-score	28.6176	28.3542	1.00929	0.0248973	0.888118	0.984298
Lactate/Glycine	ADOS-2 RRB CSS	ADOS-2 Module-1 or Module-2 Restrictive Repetitive Calibrated Severity Score	7.70588	7.79939	0.988011	-0.0438651	0.880399	0.984298
Lactate/Glycine	MSEL VR	MSEL Visual Reception T-score	31.1379	31.4551	0.989916	-0.0240235	0.897204	0.984298
Lactate/Homoserine	ADOS-2 Comparison Score	ADOS-2 Module-1 or Module-2 Comparison Severity Score	7.1875	7.11212	1.0106	0.040558	0.878785	0.984298
Lactate/Lysine	MSEL EL	MSEL Expressive Language T-score	28.32	28.0149	1.01089	0.0283851	0.89392	0.984298
Lactate/Methionine	ADOS-2 RRB CSS	ADOS-2 Module-1 or Module-2 Restrictive Repetitive Calibrated Severity Score	7.72222	7.79878	0.990183	-0.0371073	0.894057	0.984298
Lactate/Octanoylcarnitine	ADOS-2 RRB CSS	ADOS-2 Module-1 or Module-2 Restrictive Repetitive Calibrated Severity Score	7.875	7.78899	1.01104	0.0388764	0.898611	0.984298
Lactate/Ornithine	ADOS-2 RRB CSS	ADOS-2 Module-1 or Module-2 Restrictive Repetitive Calibrated Severity Score	7.875	7.79091	1.01079	0.0408121	0.889976	0.984298
Lactate/Phenylalanine	ADOS-2 RRB CSS	ADOS-2 Module-1 or Module-2 Restrictive Repetitive Calibrated Severity Score	7.88235	7.79027	1.01182	0.0431609	0.882348	0.984298
Lactate/Sarcosine	MSEL VR	MSEL Visual Reception T-score	31.76	31.4195	1.01084	0.0252992	0.901306	0.984298
Lactate/Valine	MSEL FM	MSEL Fine Motor T-score	28.1667	28.3863	0.992264	-0.0224238	0.895279	0.984298
Lactate/Xanthine	ADOS-2 RRB CSS	ADOS-2 Module-1 or Module-2 Restrictive Repetitive Calibrated Severity Score	7.9	7.82524	1.00955	0.0377017	0.886214	0.984298
Lactate/a-Ketoglutarate	BMI	Participants body mass index	16.739	16.6961	1.00258	0.0222585	0.896308	0.984298
Leu/Car	MSEL VR	MSEL Visual Reception T-score	31.8333	31.4111	1.01344	0.0301769	0.876492	0.984298
Leucine	ADOS-2 RRB CSS	ADOS-2 Module-1 or Module-2 Restrictive Repetitive Calibrated Severity Score	7.84211	7.80243	1.00508	0.0256254	0.900643	0.984298
Leucine/Carnitine	MSEL VR	MSEL Visual Reception T-score	31.8333	31.4111	1.01344	0.0301769	0.876492	0.984298
Malate/Proline	ADOS-2 Comparison Score	ADOS-2 Module-1 or Module-2 Comparison Severity Score	7.05882	7.11854	0.991611	-0.0334752	0.892559	0.984298
Malate/Proline	MSEL FM	MSEL Fine Motor T-score	28.1034	28.3889	0.989945	-0.0259886	0.895513	0.984298
Octanoylcarnitine/Asparagine	MSEL EL	MSEL Expressive Language T-score	27.8261	28.0809	0.990926	-0.0238556	0.880416	0.984298
Octanoylcarnitine/Carnitine	ADOS-2 SA CSS	ADOS-2 Module-1 or Module-2 Social Affect Calibrated Severity Score	6.8	6.87307	0.989369	-0.0378664	0.881256	0.984298
Octanoylcarnitine/Glutamic Acid	MSEL FM	MSEL Fine Motor T-score	28.0938	28.2985	0.992766	-0.021303	0.896009	0.984298
Ornithine/Phenylalanine	ADOS-2 Comparison Score	ADOS-2 Module-1 or Module-2 Comparison Severity Score	7.15	7.10976	1.00566	0.025243	0.897712	0.984298
Pyruvate/4-hydroxyproline	ADOS-2 RRB CSS	ADOS-2 Module-1 or Module-2 Restrictive Repetitive Calibrated Severity Score	7.85185	7.81132	1.00519	0.0252267	0.893994	0.984298
Pyruvate/4-hydroxyproline	ADOS-2 SA CSS	ADOS-2 Module-1 or Module-2 Social Affect Calibrated Severity Score	6.92593	6.87421	1.00752	0.0286406	0.891097	0.984298
Pyruvate/Carnitine	ADOS-2 Comparison Score	ADOS-2 Module-1 or Module-2 Comparison Severity Score	7.05	7.11963	0.99022	-0.0374782	0.875081	0.984298
Pyruvate/Kynurenine	MSEL FM	MSEL Fine Motor T-score	28.5833	28.3497	1.00824	0.0217304	0.887338	0.984298
Pyruvate/Octanoylcarnitine	MSEL DQ	MSEL Developmental Quotient (DQ)	62.2059	62.6433	0.993017	-0.0250921	0.8901	0.984298
Serine/Leucine	ADOS-2 SA CSS	ADOS-2 Module-1 or Module-2 Social Affect Calibrated Severity Score	6.92857	6.85928	1.0101	0.0389652	0.890644	0.984298
Xanthine/4-hydroxyproline	ADOS-2 SA CSS	ADOS-2 Module-1 or Module-2 Social Affect Calibrated Severity Score	6.85	6.8961	0.993315	-0.0280182	0.898303	0.984298
Xanthine/Carnitine	MSEL VR	MSEL Visual Reception T-score	30.963	31.3651	0.987179	-0.0286981	0.888324	0.984298
Xanthine/Palmitoylcarnitine	ADOS-2 RRB CSS	ADOS-2 Module-1 or Module-2 Restrictive Repetitive Calibrated Severity Score	7.86957	7.82508	1.00568	0.0268742	0.899425	0.984298
↑Glycine	AgeMonths	Participants age in months	35.1833	35.0456	1.00393	0.0180924	0.8932	0.984298
↑Glycine	MSEL FM	MSEL Fine Motor T-score	28.2167	28.4374	0.992239	-0.0204942	0.882884	0.984298
↑LacPyr↓(C6-C16)	MSEL EL	MSEL Expressive Language T-score	28.1889	28.0274	1.00576	0.0153331	0.896163	0.984298
↑LacPyr↓GlyAsp	MSEL FM	MSEL Fine Motor T-score	28.5606	28.3434	1.00766	0.0202844	0.878575	0.984298
↓Urate	BMI	Participants body mass index	16.6687	16.7012	0.998051	-0.0180798	0.899941	0.984298
↓aKG2	ADOS-2 SA CSS	ADOS-2 Module-1 or Module-2 Social Affect Calibrated Severity Score	6.91111	6.86711	1.00641	0.0244941	0.882246	0.984298
Decanoylcarnitine/Phenylalanine	MSEL FM	MSEL Fine Motor T-score	28.0769	28.2968	0.992231	-0.0225645	0.902264	0.984581
Decanoylcarnitine/Isoleucine	ADOS-2 SA CSS	ADOS-2 Module-1 or Module-2 Social Affect Calibrated Severity Score	6.91304	6.86562	1.00691	0.0267239	0.903985	0.985285
Lactate/Isoleucine	ADOS-2 RRB CSS	ADOS-2 Module-1 or Module-2 Restrictive Repetitive Calibrated Severity Score	7.71429	7.79819	0.98924	-0.0389816	0.903777	0.985285
Eta/Kyn	MSEL EL	MSEL Expressive Language T-score	28.2778	28.067	1.00751	0.0200417	0.908682	0.98544
Ethanolamine/Kynurenine	MSEL EL	MSEL Expressive Language T-score	28.2778	28.067	1.00751	0.0200417	0.908682	0.98544
Glycine/a-Ketoglutarate	MSEL FM	MSEL Fine Motor T-score	28.1111	28.3926	0.990085	-0.0230205	0.905328	0.98544
Lactate/Glutamic Acid	MSEL FM	MSEL Fine Motor T-score	28.5556	28.354	1.00711	0.018398	0.908882	0.98544
Lactate/Kynurenine	ADOS-2 Comparison Score	ADOS-2 Module-1 or Module-2 Comparison Severity Score	7.16667	7.1128	1.00757	0.0288913	0.908601	0.98544
Leu/Car	MSEL FM	MSEL Fine Motor T-score	28.1333	28.3876	0.991044	-0.0229462	0.906907	0.98544
Leucine/Carnitine	MSEL FM	MSEL Fine Motor T-score	28.1333	28.3876	0.991044	-0.0229462	0.906907	0.98544
Lys/Gln	ADOS-2 Comparison Score	ADOS-2 Module-1 or Module-2 Comparison Severity Score	7.0625	7.10574	0.993915	-0.0263601	0.908974	0.98544
Lysine/Glutamine	ADOS-2 Comparison Score	ADOS-2 Module-1 or Module-2 Comparison Severity Score	7.0625	7.10574	0.993915	-0.0263601	0.908974	0.98544
Alanine/a-Ketoglutarate	ADOS-2 RRB CSS	ADOS-2 Module-1 or Module-2 Restrictive Repetitive Calibrated Severity Score	7.82609	7.79257	1.0043	0.0202329	0.921966	0.986302
Citrate	MSEL FM	MSEL Fine Motor T-score	28.6538	28.3567	1.01048	0.024377	0.913924	0.986302
Citrulline/Glutarylcarnitine	ADOS-2 RRB CSS	ADOS-2 Module-1 or Module-2 Restrictive Repetitive Calibrated Severity Score	7.75758	7.79677	0.994972	-0.0211931	0.913018	0.986302
Decanoylcarnitine/Valine	MSEL EL	MSEL Expressive Language T-score	27.9091	28.0503	0.994965	-0.0146281	0.929171	0.986302
Eta/Kyn	MSEL FM	MSEL Fine Motor T-score	28.2222	28.4255	0.992849	-0.0183231	0.919023	0.986302
Ethanolamine/Carnitine	ADOS-2 RRB CSS	ADOS-2 Module-1 or Module-2 Restrictive Repetitive Calibrated Severity Score	7.84211	7.79205	1.00642	0.0256312	0.922229	0.986302
Ethanolamine/Kynurenine	MSEL FM	MSEL Fine Motor T-score	28.2222	28.4255	0.992849	-0.0183231	0.919023	0.986302
Glycine/Arginine	MSEL VR	MSEL Visual Reception T-score	31.2	31.4622	0.991666	-0.0190996	0.91423	0.986302
Glycine/Citrate	MSEL EL	MSEL Expressive Language T-score	27.9	28.0738	0.993808	-0.0165361	0.912547	0.986302
Glycine/Valine	AgeMonths	Participants age in months	34.9032	35.0642	0.995408	-0.0205016	0.913209	0.986302
Hexanoylcarnitine/Leucine	ADOS-2 RRB CSS	ADOS-2 Module-1 or Module-2 Restrictive Repetitive Calibrated Severity Score	7.7619	7.79503	0.99575	-0.0200081	0.92568	0.986302
Homoserine/Leucine	ADOS-2 Comparison Score	ADOS-2 Module-1 or Module-2 Comparison Severity Score	7.06667	7.11411	0.993331	-0.0252914	0.927342	0.986302
Lactate/4-hydroxyproline	BMI	Participants body mass index	16.7274	16.6996	1.00167	0.0154702	0.914258	0.986302
Lactate/Arginine	ADOS-2 SA CSS	ADOS-2 Module-1 or Module-2 Social Affect Calibrated Severity Score	6.91304	6.87578	1.00542	0.0214744	0.921308	0.986302
Lactate/Asparagine	BMI	Participants body mass index	16.6716	16.7005	0.998268	-0.0155316	0.928131	0.986302
Lactate/Aspartic Acid	MSEL VR	MSEL Visual Reception T-score	31.641	31.4192	1.00706	0.0166634	0.918671	0.986302
Lactate/Glycine	BMI	Participants body mass index	16.726	16.6972	1.00173	0.0156525	0.924974	0.986302
Lactate/Octanoylcarnitine	MSEL EL	MSEL Expressive Language T-score	27.8788	28.0699	0.993193	-0.0179156	0.922723	0.986302
Lactate/Threonine	MSEL VR	MSEL Visual Reception T-score	31.2353	31.4514	0.993129	-0.0165615	0.922405	0.986302
Lactate/Xanthine	MSEL FM	MSEL Fine Motor T-score	28.4516	28.2243	1.00806	0.0210555	0.911424	0.986302
Lactate/a-Ketoglutarate	MSEL FM	MSEL Fine Motor T-score	28.2	28.3833	0.993542	-0.0173032	0.926668	0.986302
Lactate/a-Ketoglutarate	MSEL RL	MSEL Receptive Language T-score	27.2333	26.9572	1.01024	0.021521	0.918053	0.986302
Octanoylcarnitine/Asparagine	MSEL DQ	MSEL Developmental Quotient (DQ)	62.8261	62.591	1.00376	0.0140236	0.926339	0.986302
Octanoylcarnitine/Sarcosine	MSEL EL	MSEL Expressive Language T-score	28.2593	28.0453	1.00763	0.0202734	0.919753	0.986302
Ornithine/Citrate	ADOS-2 RRB CSS	ADOS-2 Module-1 or Module-2 Restrictive Repetitive Calibrated Severity Score	7.81579	7.79221	1.00303	0.0149882	0.921709	0.986302
Ornithine/a-Ketoglutarate	MSEL VR	MSEL Visual Reception T-score	31.1765	31.4557	0.991122	-0.0192168	0.918995	0.986302
Pyruvate/Palmitoylcarnitine	ADOS-2 RRB CSS	ADOS-2 Module-1 or Module-2 Restrictive Repetitive Calibrated Severity Score	7.84211	7.79012	1.00667	0.0257043	0.923499	0.986302
Taurine/Ethanolamine	ADOS-2 Comparison Score	ADOS-2 Module-1 or Module-2 Comparison Severity Score	7.05882	7.1148	0.992132	-0.029301	0.911886	0.986302
Taurine/Phenylalanine	ADOS-2 RRB CSS	ADOS-2 Module-1 or Module-2 Restrictive Repetitive Calibrated Severity Score	7.84615	7.80124	1.00576	0.0217224	0.925973	0.986302
Xanthine/4-hydroxyproline	ADOS-2 Comparison Score	ADOS-2 Module-1 or Module-2 Comparison Severity Score	7.1	7.13961	0.994452	-0.0224411	0.922618	0.986302
↑Ethanolamine	MSEL RL	MSEL Receptive Language T-score	26.8485	26.993	0.994645	-0.0124632	0.926495	0.986302
↑Glycine	ADOS-2 RRB CSS	ADOS-2 Module-1 or Module-2 Restrictive Repetitive Calibrated Severity Score	7.775	7.80844	0.995717	-0.0185853	0.915125	0.986302
↑Ornithine	MSEL FM	MSEL Fine Motor T-score	28.3077	28.4338	0.995564	-0.0109915	0.92914	0.986302
↓Carnitine2	ADOS-2 RRB CSS	ADOS-2 Module-1 or Module-2 Restrictive Repetitive Calibrated Severity Score	7.77193	7.79931	0.99649	-0.0142786	0.927883	0.986302
↓Hydroxyproline	ADOS-2 Comparison Score	ADOS-2 Module-1 or Module-2 Comparison Severity Score	7.08511	7.11628	0.99562	-0.0163885	0.920737	0.986302
↓aKG1	MSEL FM	MSEL Fine Motor T-score	28.5172	28.3531	1.00579	0.0139934	0.926456	0.986302
Homoserine/Isoleucine	MSEL FM	MSEL Fine Motor T-score	28.5625	28.4004	1.00571	0.0156663	0.929755	0.986349
Pyruvate/Hexanoylcarnitine	MSEL VR	MSEL Visual Reception T-score	31.2093	31.4085	0.993658	-0.0142748	0.930666	0.986743
↑Ethanolamine	MSEL VR	MSEL Visual Reception T-score	31.303	31.4571	0.995103	-0.0112275	0.932783	0.988415
↓Carnitine1	ADOS-2 RRB CSS	ADOS-2 Module-1 or Module-2 Restrictive Repetitive Calibrated Severity Score	7.81481	7.7911	1.00304	0.0129941	0.933338	0.988431
Glycine/Citrate	MSEL DQ	MSEL Developmental Quotient (DQ)	62.9	62.6465	1.00405	0.013157	0.935983	0.989514
Lactate/a-Ketoglutarate	MSEL DQ	MSEL Developmental Quotient (DQ)	62.9667	62.6531	1.005	0.0165824	0.935518	0.989514
Leucine/Glutarylcarnitine	AgeMonths	Participants age in months	35	35.125	0.996441	-0.0161709	0.935055	0.989514
Decanoylcarnitine/Carnitine	MSEL VR	MSEL Visual Reception T-score	31.2222	31.4044	0.994199	-0.0133534	0.938948	0.990183
Lactate/Aspartic Acid	ADOS-2 Comparison Score	ADOS-2 Module-1 or Module-2 Comparison Severity Score	7.14286	7.11321	1.00417	0.0156841	0.939398	0.990183
Lactate/Glutarylcarnitine	ADOS-2 SA CSS	ADOS-2 Module-1 or Module-2 Social Affect Calibrated Severity Score	6.83333	6.87077	0.994551	-0.0198181	0.939863	0.990183
Octanoylcarnitine/Asparagine	MSEL FM	MSEL Fine Motor T-score	28.1739	28.2966	0.995663	-0.0118077	0.938252	0.990183
Octanoylcarnitine/Sarcosine	MSEL RL	MSEL Receptive Language T-score	27.1481	26.9591	1.00701	0.016079	0.938095	0.990183
Ornithine/Lysine	MSEL RL	MSEL Receptive Language T-score	26.8462	27.0044	0.994142	-0.0132856	0.93936	0.990183
Decanoylcarnitine/Phenylalanine	MSEL DQ	MSEL Developmental Quotient (DQ)	62.8462	62.6	1.00393	0.0145622	0.941972	0.990993
Glycine/Asparagine	ADOS-2 RRB CSS	ADOS-2 Module-1 or Module-2 Restrictive Repetitive Calibrated Severity Score	7.82609	7.80308	1.00295	0.0143393	0.942256	0.990993
Lactate	ADOS-2 RRB CSS	ADOS-2 Module-1 or Module-2 Restrictive Repetitive Calibrated Severity Score	7.75	7.79697	0.993976	-0.0218915	0.942066	0.990993
Hexanoylcarnitine/Leucine	ADOS-2 Comparison Score	ADOS-2 Module-1 or Module-2 Comparison Severity Score	7.14286	7.1118	1.00437	0.0165785	0.943502	0.991501
Lactate/Aspartic Acid	ADOS-2 RRB CSS	ADOS-2 Module-1 or Module-2 Restrictive Repetitive Calibrated Severity Score	7.82143	7.79245	1.00372	0.0149759	0.944962	0.991501
Lactate/Glutamic Acid	ADOS-2 RRB CSS	ADOS-2 Module-1 or Module-2 Restrictive Repetitive Calibrated Severity Score	7.81818	7.79233	1.00332	0.0135953	0.945447	0.991501
Lactate/Ornithine	MSEL EL	MSEL Expressive Language T-score	28.1875	28.0473	1.005	0.0130714	0.944743	0.991501
↑Malate	BMI	Participants body mass index	16.6833	16.7005	0.99897	-0.00927558	0.945283	0.991501
Lactate/Aspartic Acid	AgeMonths	Participants age in months	35.1538	35.059	1.00271	0.0115838	0.947311	0.992886
Decanoylcarnitine/Leucine	ADOS-2 SA CSS	ADOS-2 Module-1 or Module-2 Social Affect Calibrated Severity Score	6.89474	6.86728	1.004	0.0150348	0.951867	0.994122
Methionine/Carnitine	ADOS-2 SA CSS	ADOS-2 Module-1 or Module-2 Social Affect Calibrated Severity Score	6.9	6.87117	1.0042	0.015564	0.949626	0.994122
Ornithine/Citrate	ADOS-2 Comparison Score	ADOS-2 Module-1 or Module-2 Comparison Severity Score	7.13158	7.11364	1.00252	0.0101747	0.951605	0.994122
Taurine/Palmitoylcarnitine	ADOS-2 Comparison Score	ADOS-2 Module-1 or Module-2 Comparison Severity Score	7.14286	7.1118	1.00437	0.0152164	0.951445	0.994122
Xanthine/Carnitine	AgeMonths	Participants age in months	35.0741	35.1678	0.997335	-0.0123072	0.950123	0.994122
↑Glycine	BMI	Participants body mass index	16.7158	16.6987	1.00103	0.00828095	0.952293	0.994122
↑TauXan↓C16	MSEL DQ	MSEL Developmental Quotient (DQ)	62.7551	62.5973	1.00252	0.00915046	0.951949	0.994122
Decanoylcarnitine/Phenylalanine	MSEL RL	MSEL Receptive Language T-score	27.1154	26.9613	1.00572	0.0127447	0.952876	0.994163
Homoserine/Isoleucine	MSEL EL	MSEL Expressive Language T-score	27.9688	28.0899	0.995686	-0.0111089	0.953613	0.994366
Octanoylcarnitine/Isoleucine	ADOS-2 RRB CSS	ADOS-2 Module-1 or Module-2 Restrictive Repetitive Calibrated Severity Score	7.8125	7.79205	1.00262	0.0129348	0.95506	0.995308
↑LacPyr↓GlyAsp	MSEL RL	MSEL Receptive Language T-score	26.8939	26.9861	0.996586	-0.00768372	0.955938	0.995655
Lactate/Aspartic Acid	ADOS-2 SA CSS	ADOS-2 Module-1 or Module-2 Social Affect Calibrated Severity Score	6.89286	6.87107	1.00317	0.0115589	0.956682	0.995682
Taurine/Phenylalanine	AgeMonths	Participants age in months	35	35.0674	0.998078	-0.00883246	0.957051	0.995682
Taurine/Ethanolamine	ADOS-2 SA CSS	ADOS-2 Module-1 or Module-2 Social Affect Calibrated Severity Score	6.88235	6.86103	1.00311	0.0125418	0.959336	0.997491
Glycine/Arginine	MSEL FM	MSEL Fine Motor T-score	28.3429	28.4341	0.99679	-0.00865249	0.960333	0.997961
Glycine/Phenylalanine	MSEL EL	MSEL Expressive Language T-score	28	28.0882	0.996861	-0.00854196	0.961297	0.998111
Lactate/Taurine	ADOS-2 RRB CSS	ADOS-2 Module-1 or Module-2 Restrictive Repetitive Calibrated Severity Score	7.81818	7.79321	1.0032	0.0121544	0.961568	0.998111
Glycine/Valine	ADOS-2 Comparison Score	ADOS-2 Module-1 or Module-2 Comparison Severity Score	7.10526	7.12195	0.997657	-0.0100369	0.963009	0.998213
Lactate/Arginine	MSEL FM	MSEL Fine Motor T-score	28.3171	28.3956	0.997234	-0.00745603	0.963136	0.998213
Serine/Citrate	MSEL FM	MSEL Fine Motor T-score	28.4615	28.3646	1.00342	0.00830732	0.963322	0.998213
↑Ornithine	MSEL RL	MSEL Receptive Language T-score	27.0659	27	1.00244	0.00550718	0.963848	0.998213
Alanine/Kynurenine	AgeMonths	Participants age in months	35.0357	35.0637	0.999202	-0.0036323	0.985044	0.998397
Citrate	AgeMonths	Participants age in months	35.1154	35.0637	1.00147	0.00685888	0.972044	0.998397
Decanoylcarnitine/4-hydroxyproline	AgeMonths	Participants age in months	35.125	35.0983	1.00076	0.00355717	0.984024	0.998397
Decanoylcarnitine/Valine	AgeMonths	Participants age in months	35.0909	35.1116	0.999411	-0.00264211	0.988453	0.998397
Ethanolamine/Citrate	MSEL DQ	MSEL Developmental Quotient (DQ)	62.5517	62.6795	0.997962	-0.00718765	0.971078	0.998397
Ethanolamine/Urate	ADOS-2 SA CSS	ADOS-2 Module-1 or Module-2 Social Affect Calibrated Severity Score	6.88889	6.87195	1.00246	0.010096	0.965836	0.998397
Ethanolamine/a-Ketoglutarate	MSEL DQ	MSEL Developmental Quotient (DQ)	62.7436	62.6659	1.00124	0.00422495	0.98099	0.998397
Glutamic Acid/4-hydroxyproline	ADOS-2 RRB CSS	ADOS-2 Module-1 or Module-2 Restrictive Repetitive Calibrated Severity Score	7.81818	7.82462	0.999178	-0.00328177	0.989461	0.998397
Glycine/Citrate	MSEL FM	MSEL Fine Motor T-score	28.34	28.3758	0.998737	-0.00297638	0.985592	0.998397
Glycine/Methionine	AgeMonths	Participants age in months	35.0323	35.0641	0.999092	-0.00419766	0.981552	0.998397
Glycine/Methionine	BMI	Participants body mass index	16.6877	16.7017	0.999161	-0.0065309	0.973492	0.998397
Glycine/Methionine	MSEL FM	MSEL Fine Motor T-score	28.4516	28.4081	1.00153	0.00382787	0.984519	0.998397
Homoserine/Isoleucine	MSEL DQ	MSEL Developmental Quotient (DQ)	62.6562	62.7195	0.998992	-0.00371371	0.983663	0.998397
Homoserine/Leucine	ADOS-2 SA CSS	ADOS-2 Module-1 or Module-2 Social Affect Calibrated Severity Score	6.86667	6.86186	1.0007	0.00265233	0.992396	0.998397
Lactate/Citrate	ADOS-2 RRB CSS	ADOS-2 Module-1 or Module-2 Restrictive Repetitive Calibrated Severity Score	7.78571	7.79518	0.998786	-0.00424017	0.98968	0.998397
Lactate/Citrulline	ADOS-2 RRB CSS	ADOS-2 Module-1 or Module-2 Restrictive Repetitive Calibrated Severity Score	7.80952	7.79385	1.00201	0.00776717	0.97573	0.998397
Lactate/Glutamic Acid	ADOS-2 Comparison Score	ADOS-2 Module-1 or Module-2 Comparison Severity Score	7.12121	7.11502	1.00087	0.00326367	0.986435	0.998397
Lactate/Glycine	ADOS-2 SA CSS	ADOS-2 Module-1 or Module-2 Social Affect Calibrated Severity Score	6.88235	6.87234	1.00146	0.00601479	0.98002	0.998397
Lactate/Histidine	MSEL VR	MSEL Visual Reception T-score	31.375	31.4655	0.997123	-0.00684337	0.969285	0.998397
Lactate/Homocitrulline	ADOS-2 RRB CSS	ADOS-2 Module-1 or Module-2 Restrictive Repetitive Calibrated Severity Score	7.80769	7.79375	1.00179	0.00721636	0.97434	0.998397
Lactate/Kynurenine	MSEL EL	MSEL Expressive Language T-score	28.0333	28.0578	0.999127	-0.00229426	0.990543	0.998397
Lactate/Leucine	ADOS-2 RRB CSS	ADOS-2 Module-1 or Module-2 Restrictive Repetitive Calibrated Severity Score	7.76923	7.7958	0.996592	-0.0120348	0.97164	0.998397
Lactate/Malate	ADOS-2 RRB CSS	ADOS-2 Module-1 or Module-2 Restrictive Repetitive Calibrated Severity Score	7.80769	7.79375	1.00179	0.00694713	0.975891	0.998397
Lactate/Methionine	ADOS-2 Comparison Score	ADOS-2 Module-1 or Module-2 Comparison Severity Score	7.11111	7.11585	0.999334	-0.00261536	0.991485	0.998397
Lactate/Ornithine	MSEL DQ	MSEL Developmental Quotient (DQ)	62.7188	62.6688	1.0008	0.00308275	0.98562	0.998397
Lactate/Proline	MSEL VR	MSEL Visual Reception T-score	31.5	31.4328	1.00214	0.0054849	0.974327	0.998397
Lactate/a-Ketoglutarate	MSEL EL	MSEL Expressive Language T-score	27.9667	28.0621	0.996599	-0.00839154	0.967183	0.998397
Lys/Phe	MSEL RL	MSEL Receptive Language T-score	27.0741	26.9873	1.00322	0.00765344	0.969268	0.998397
Lysine/Phenylalanine	MSEL RL	MSEL Receptive Language T-score	27.0741	26.9873	1.00322	0.00765344	0.969268	0.998397
Octanoylcarnitine/Asparagine	BMI	Participants body mass index	16.7104	16.7069	1.00021	0.00179254	0.990082	0.998397
Octanoylcarnitine/Glutamic Acid	MSEL DQ	MSEL Developmental Quotient (DQ)	62.6875	62.6078	1.00127	0.00475012	0.978898	0.998397
Octanoylcarnitine/Glutamic Acid	MSEL RL	MSEL Receptive Language T-score	26.9062	26.9739	0.997494	-0.00566082	0.976646	0.998397
Octanoylcarnitine/Isoleucine	ADOS-2 SA CSS	ADOS-2 Module-1 or Module-2 Social Affect Calibrated Severity Score	6.875	6.8685	1.00095	0.00384415	0.987789	0.998397
Octanoylcarnitine/Isoleucine	MSEL EL	MSEL Expressive Language T-score	28.08	28.0558	1.00086	0.0024623	0.989806	0.998397
Octanoylcarnitine/Sarcosine	MSEL VR	MSEL Visual Reception T-score	31.4444	31.3879	1.0018	0.00416753	0.98326	0.998397
Ornithine/Phenylalanine	ADOS-2 SA CSS	ADOS-2 Module-1 or Module-2 Social Affect Calibrated Severity Score	6.85	6.8628	0.998134	-0.00785232	0.971006	0.998397
Ornithine/a-Ketoglutarate	MSEL DQ	MSEL Developmental Quotient (DQ)	62.5294	62.6825	0.997558	-0.00797583	0.967404	0.998397
Phenylalanine/Citrate	MSEL FM	MSEL Fine Motor T-score	28.4255	28.3667	1.00208	0.00484422	0.97733	0.998397
Pyruvate/Glutamic Acid	AgeMonths	Participants age in months	35.0408	35.0692	0.999191	-0.00341797	0.982918	0.998397
Pyruvate/Kynurenine	MSEL VR	MSEL Visual Reception T-score	31.4167	31.4388	0.999297	-0.00167024	0.990951	0.998397
Pyruvate/Octanoylcarnitine	AgeMonths	Participants age in months	35.1471	35.116	1.00089	0.0040682	0.981525	0.998397
Pyruvate/Octanoylcarnitine	MSEL FM	MSEL Fine Motor T-score	28.2353	28.2888	0.998107	-0.00478472	0.979686	0.998397
Pyruvate/Sarcosine	MSEL EL	MSEL Expressive Language T-score	28.0882	28.054	1.00122	0.00323828	0.985714	0.998397
Pyruvate/a-Ketoglutarate	MSEL VR	MSEL Visual Reception T-score	31.3415	31.4452	0.996702	-0.00740132	0.964837	0.998397
Taurine/Carnitine	MSEL DQ	MSEL Developmental Quotient (DQ)	62.76	62.6674	1.00148	0.0053853	0.97918	0.998397
↑Alanine	ADOS-2 RRB CSS	ADOS-2 Module-1 or Module-2 Restrictive Repetitive Calibrated Severity Score	7.80952	7.80392	1.00072	0.00313236	0.985278	0.998397
↑LacPyr↓(C6-C16)	MSEL FM	MSEL Fine Motor T-score	28.3111	28.2793	1.00112	0.00294752	0.980223	0.998397
↑LacPyr↓GlyAsp	MSEL DQ	MSEL Developmental Quotient (DQ)	62.6515	62.6752	0.999623	-0.00135536	0.991929	0.998397
↑LacPyr↓GlyAsp	MSEL VR	MSEL Visual Reception T-score	31.4697	31.4316	1.00121	0.00282235	0.982822	0.998397
↑Ornithine	MSEL DQ	MSEL Developmental Quotient (DQ)	62.7473	62.7083	1.00062	0.00212537	0.986146	0.998397
↑TauXan↓C16	MSEL FM	MSEL Fine Motor T-score	28.2449	28.2896	0.99842	-0.00411539	0.978783	0.998397
↓Glutamine	MSEL EL	MSEL Expressive Language T-score	28.0488	28.0852	0.998705	-0.00336466	0.984089	0.998397
Glycine/Lysine	MSEL EL	MSEL Expressive Language T-score	28.0385	28.0572	0.999332	-0.00164259	0.994006	0.998853
Glycine/Valine	BMI	Participants body mass index	16.7054	16.7026	1.00017	0.0012211	0.995408	0.998853
Hypoxanthine/Carnitine	AgeMonths	Participants age in months	35.16	35.1625	0.999928	-0.000311543	0.998853	0.998853
Lactate/Histidine	ADOS-2 RRB CSS	ADOS-2 Module-1 or Module-2 Restrictive Repetitive Calibrated Severity Score	7.78947	7.78834	1.00015	0.000555258	0.998356	0.998853
Lactate/Homoserine	ADOS-2 SA CSS	ADOS-2 Module-1 or Module-2 Social Affect Calibrated Severity Score	6.875	6.87273	1.00033	0.00133174	0.995826	0.998853
Lys/Phe	ADOS-2 RRB CSS	ADOS-2 Module-1 or Module-2 Restrictive Repetitive Calibrated Severity Score	7.8	7.79817	1.00024	0.00108369	0.996187	0.998853
Lysine/Phenylalanine	ADOS-2 RRB CSS	ADOS-2 Module-1 or Module-2 Restrictive Repetitive Calibrated Severity Score	7.8	7.79817	1.00024	0.00108369	0.996187	0.998853
Phenylalanine/Citrate	AgeMonths	Participants age in months	35.0638	35.0667	0.999919	-0.000380093	0.997931	0.998853
Taurine/Palmitoylcarnitine	AgeMonths	Participants age in months	35.129	35.1174	1.00033	0.00147324	0.993807	0.998853
Xanthine/4-hydroxyproline	ADOS-2 RRB CSS	ADOS-2 Module-1 or Module-2 Restrictive Repetitive Calibrated Severity Score	7.85	7.85065	0.999917	-0.000406995	0.998558	0.998853
↑C10C8C6	ADOS-2 Comparison Score	ADOS-2 Module-1 or Module-2 Comparison Severity Score	7.11429	7.11355	1.0001	0.000400933	0.997626	0.998853
